# Supplementary material for: Oriented intergrowth of the catalyst layer in membrane electrode assembly for alkaline water electrolysis
Source: PubMed Central journal article supplement (PMC9794718; doi:10.1038/s41467-022-35603-9), 2022-12-27
Supplement: 41467_2022_35603_MOESM1_ESM.pdf [file 41467_2022_35603_MOESM1_ESM.pdf]

**Supplementary Information**

**Oriented intergrowth of the catalyst layer in membrane electrode assembly for alkaline water electrolysis**

Lei Wan<sup>1</sup>, Maobin Pang<sup>1</sup>, Junfa Le<sup>1</sup>, Ziang Xu<sup>1</sup>, Hangyu Zhou<sup>1</sup>, Qin Xu<sup>1</sup> and Baoguo Wang<sup>\*1</sup>

<sup>1</sup>**Department of Chemical Engineering, Tsinghua University, Beijing, China**

\*Corresponding author. Email: [bgwang@tsinghua.edu.cn](mailto:bgwang@tsinghua.edu.cn)

## Supplementary Notes

### 1. Experimental & Results

#### 1.1. Basic property of membranes characterization

**Water contact angle measurement.** Samples of all-in-one MEAs and other membranes were cut into  $\sim 2\text{ cm} \times 2\text{ cm}$  pieces and immersed in deionized water to reach a fully wet state before water contact angle measurement (Dataphysics OCAH200). A setting of 10  $\mu\text{L}$  volume drop deionized water was used at room temperature.

**Electrolyte uptake and swelling measurement.** To measure the electrolyte uptake (including water and KOH) and swelling ratio of the all-in-one MEAs, the weight and length of membranes were measured before treating with 30 wt.% KOH and after immersing in 30 wt.% KOH, respectively. To measure the weight of dry membranes, the membranes were dried in a vacuum at 60 °C for 24 h. The electrolyte uptake of the different membranes was defined as:  $\text{electrolyte uptake} = (m_h - m_d)/m_d \times 100\%$ , in which  $m_d$  and  $m_h$  are the mass of dry and hydrated membranes, respectively. The swelling ratio of the different membranes was defined as:  $\text{swelling ratio} = (X_w - X_d)/X_d \times 100\%$ , in which  $X_d$  and  $X_w$  are the length of corresponding dry and wet membranes, respectively.

**Area resistance measurement.** The area resistance of the membranes was evaluated by a two-electrode electrochemical impedance spectroscopy (EIS) method in an assembled coin cell. The potentiostat with an AC bias and a frequency range were set 10 mV and 1 MHz-0.1 Hz, respectively. The samples impregnated with aqueous electrolyte (10-30 wt.% KOH) were sandwiched between two electrodes with an active area of 1.13  $\text{cm}^2$ , and sealed with coin cell cases for area resistance measurement at 25 °C.

**The hydroxide ions transport properties.** The ionic transport properties of different membranes were investigated using an electrochemical workstation (VersaSTAT-3F, Princeton Applied Research). The current–voltage (I–V) profile was recorded when the membrane was sandwiched between two cells soaking with a gradient of 1–3  $\text{mol L}^{-1}$  NaOH solution. Two Ag/AgCl reference electrodes filled with saturated KCl solution and two salt bridges filled with saturated KCl solution were employed to eliminate the potential

drop. Thus, the open-cell voltage of the device ( $V_0$ ) is equal to the value of diffusion potential ( $V_d$ ) resulted from the NaOH concentration gradient, which can be calculated as the following equation:  $V_0 = V_d = \frac{RT}{F}(t_{Na^+} - t_{OH^-})\ln(\Delta)$ .  $R$ ,  $T$ ,  $F$ ,  $t_{Na^+}$ ,  $t_{OH^-}$ , and  $\Delta$  are the gas constant, temperature, faraday constant,  $Na^+$  transference number,  $OH^-$  transference number, and activity gradient (the mean ion activity coefficient was considered since the concentration of NaOH solution is high), respectively.

**Bubble point pressure measurement.** Samples of all-in-one MEAs of 100% relative humidity were cut into 2 cm  $\times$  2 cm pieces and equipped into a bubble pressure analyzer. Pressurized Ar gas was applied to the sample. Bubble pressure value was record when the first bubble appeared.

**Mechanical strength measurement.** The mechanical properties of membranes in dry state were measured using a microcomputer controlled electronic universal testing machine (Changchun Kexin Co.,China) at room temperature in controlled force mode with a stretch rate of 5 mm min<sup>-1</sup>.

**Alkaline stability measurement.** A piece of membranes (1 cm  $\times$  6 cm) was cut out and immersed into 30 wt.% KOH solution and treated at 80 °C. The area resistance and mechanical strength were measured to evaluate its alkaline stability.

## 1.2. Overpotential Analysis

The cell voltage  $E_{cell}$  is composed of the sum of the reversible cell potential  $E_{rev}$  and the three main overpotential  $\eta_i$ :

$$E_{cell} = E_{rev} + \eta_{kin} + \eta_{ohm} + \eta_{mass}$$

Where  $\eta_{kin}$  is the kinetic,  $\eta_{ohm}$  is the ohmic, and  $\eta_{mass}$  is the mass transport overpotential.

At a temperature of 60 °C, the saturation pressure of H<sub>2</sub>O was 0.47 bar<sub>a</sub>. For liquid water, the activity of water,  $a(H_2O)$ , was one, while the activity of the gaseous species was represented by the ratio of their partial pressure to the standard pressure of 1 bar. The temperature dependent standard reversible potential,  $E_{rev}$ , could be obtained from the literature

$$E_{rev} = 1.2291 - 0.0008456(T-298.15)$$

Where the voltages, first two terms on right hand side of equation, were measured in V, and the temperatures in K. Under current electrolyzer testing conditions, the  $E_{rev}$  was calculated to be 1.168 V, with a thermoneutral voltage of 1.42 V.

### **Ohmic overpotential ( $\eta_{ohm}$ )**

EIS was used to measure the high frequency resistance (HFR) representing the total electronic cell resistance  $R_{tot}$ . The ohmic overpotential,  $\eta_{ohm}$ , is therefore determined as:

$$\eta_{ohm} = i \times R_{tot} = i \times HRF$$

### **Kinetic overpotential( $\eta_{kin}$ )**

The kinetic overpotential was extracted using a Tafel model, in which the Tafel slope  $b$  and exchange current density  $i_0$  were the governing kinetic parameters. The Tafel model was fitted to  $iR$ -free cell voltages between 4 and 20 mA cm<sup>-1</sup>. Assuming a non-polarizable HER, the entire kinetic overpotential of the cell was governed by OER with the Tafel slope  $b$  as  $2.303 \times RT/4F$  where  $R$  is the ideal gas constant,  $T$  is temperature, and  $F$  is Faraday's constant:

$$\eta_{kin} = b \times \log(i/i_0)$$

### **Mass transport Overpotential( $\eta_{mass}$ )**

Mass transport was defined as a sum of gaseous/liquid transfer in the LGDL/CL and ionic transport in the CLs. In this study, it was calculated by subtracting the reversible cell potential and kinetic and ohmic overpotentials from the measured cell potential.

## **1.3. Levelized cost of hydrogen (LCOH) analysis**

The LCOH was used as an index to quantify the cost of hydrogen production from alkaline water electrolysis. The LCOH (\$ kg<sup>-1</sup>) can be expressed as follows:

$$LCOH = \frac{(CAPEX \times CRF) + C_{O\&M}}{M_{H2}}$$



Where CAPEX is the total capital expenditure of the electrolyzer (\$), CRF is the capital recovery factor,  $C_{O\&M}$  is the annual operation and maintenance costs (\$) and  $M_{H_2}$  is the total hydrogen produced by the electrolyzer in one year (kg).

CRF stands for the capital recovery factor, which converts the capital cost into a series of equivalent annual payments over the system lifetime  $N$  considering an interest rate  $i$ .

$$CRF = \frac{i \times (1 + i)^N}{(1 + i)^N - 1}$$

The capital costs of the electrolyzer CAPEX can be calculated with Eq. (3).

$$CAPEX = P_{el} \times I_{el}$$

Where  $P_{el}$  is the rated power of the electrolyzer (kW) and  $I_{el}$  is the specific investment cost of the electrolyzer (\$ kW<sup>-1</sup>).

The annual operation and maintenance costs  $C_{O\&M}$  (\$) include the costs of electricity, electrolyte, nonfuel variable operation and maintenance.

$$C_{O\&M} = (\tau \times P_{el} \times \mu_{el} \times c_e) + (\gamma \times M_{H_2} \times c_w) + (CAPEX \times \varphi)$$

Where  $\tau$  is the total number of hours in the year (h),  $P_{el}$  is the rated power of the electrolyzer (kW),  $\mu_{el}$  is the utilization rate of the electrolyzer expressed as a fraction of 1,  $c_e$  is the price of electricity (\$ kWh<sup>-1</sup>),  $\gamma$  is the water required to produce each kg of hydrogen (L kg<sup>-1</sup>),  $M_{H_2}$  is the hydrogen produced by the installation in one year (kg), and  $c_w$  is the price of electrolyte (\$ kg<sup>-1</sup>). Maintenance costs are assumed to be constant throughout the system's lifetime and are estimated as a fraction ( $\varphi$ ) of the electrolyzer capital cost.

The annual production of hydrogen using alkaline water electrolysis can be computed using Eq. (5):

$$M_{H_2} = \frac{\tau \times P_{el} \times \mu_{el}}{E_{el}}$$

In the equation above,  $E_{el}$  stands for the power consumption of the electrolyzer ( $\text{kWh kg}^{-1}$ ).

The energy efficiency of an electrolysis cell is defined as the net energy present in the hydrogen produced by the cell divided by the net energy consumed by the cell to produce it, expressed as a percentage. The net energy present in hydrogen is its higher heating value (HHV), which is  $39.4 \text{ kWh kg}^{-1}$  of hydrogen. An electrolysis cell operating at a cell potential equal to the the voltage of water electrolysis ( $1.47 \text{ V}$  at  $60 \text{ }^\circ\text{C}$ ) displays 100% energy efficiency. In this work, the energy efficiency of advanced alkaline water electrolysis with conventional MEA-CCM and all-in-one MEA-S is  $\sim 84\%$  and  $\sim 89\%$  at the current density of  $1000 \text{ mA cm}^{-2}$ , respectively. Owing to the rapid degradation of conventional MEA-CCM, the energy efficiency of alkaline water electrolysis using conventional MEA-CCM is  $\sim 70\%$  after the stability test.

### **Common assumptions:**

Advanced alkaline water electrolysis stack system is constructed by stacking 200 single cells (200-cell) (Supplementary Table 5). The stack provided a current density of  $1000 \text{ mA cm}^{-2}$  at approximately 392, 356, 330 and 314  $V_{\text{stack}}$  for conventional MEA-CCM (Pt/C//X37-50// $\text{IrO}_2$ ), conventional MEA-CCS (CoNiS//Zirfon Thin//CoNiS), all-in-one MEA-S and all-in-one MEA (CoNiS@FeNi LDH), respectively.

Conventional MEA-CCM (Pt/C//X37-50// $\text{IrO}_2$ ): electricity cost =  $\$25 \text{ MWh}^{-1}$ , the specific investment cost of the electrolyzer  $I_{el} = \$400 \text{ kW}^{-1}$ , electrolyzer lifetime = 10 years, interest rate (i) = 6.5%, operations and maintenance (O&M) cost = 4% of electrolyzer CAPEX p.a., cost of electrolyte (5 wt% KOH) =  $\$0.002 \text{ kg}^{-1}$ .

Conventional MEA-CCS (CoNiS//Zirfon Thin//CoNiS): electricity cost =  $\$25 \text{ MWh}^{-1}$ , the specific investment cost of the electrolyzer  $I_{el} = \$300 \text{ kW}^{-1}$ , electrolyzer lifetime = 20 years,

interest rate ( $i$ ) = 6.5%, operations and maintenance (O&M) cost = 4% of electrolyzer CAPEX p.a., cost of electrolyte (30 wt% KOH) = \$0.01 kg<sup>-1</sup>.

All-in-one MEA-S and all-in-one MEA (CoNiS@FeNi LDH): electricity cost = \$25 MWh<sup>-1</sup>, the specific investment cost of the electrolyzer  $I_{el}$  = \$200 kW<sup>-1</sup>, electrolyzer lifetime = 20 years, interest rate ( $i$ ) = 6.5%, operations and maintenance (O&M) cost = 4% of electrolyzer CAPEX p.a., cost of electrolyte (30 wt% KOH) = \$0.01 kg<sup>-1</sup>, cost of electrolyte (5 wt% KOH) = \$0.002 kg<sup>-1</sup>.

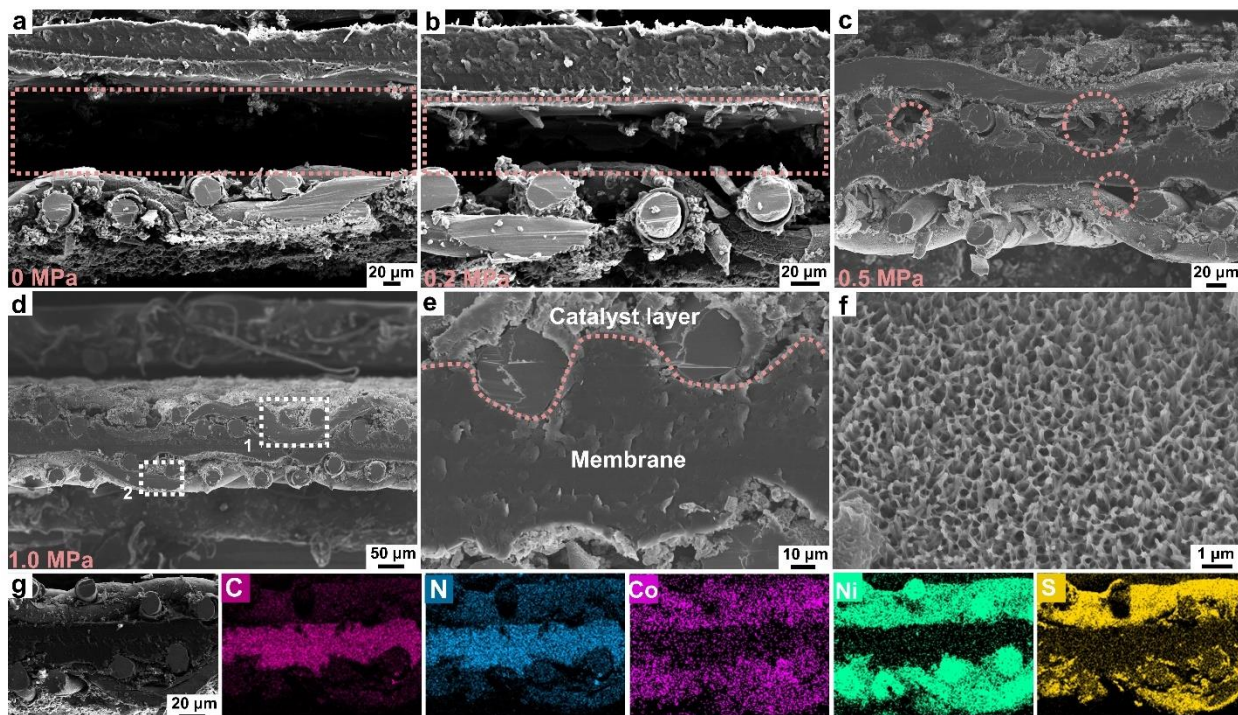

**Supplementary Fig. 1 | Morphologies characterization of C-MEA-CCS (CoNiS//X37-50//CoNiS).**

SEM images of MEAs prepared by hot-pressing of (a) 0 MPa, (b) 0.2 MPa, (c) 0.5 MPa and (d) 1.0 MPa. (e) SEM images of the interface between catalyst layer and membrane (the position 1 marked in (d)). (f) SEM images of catalyst layer (the position 2 marked in (d)). (g) Corresponding EDX mapping of MEA prepared by hot-pressing of 1.0 MPa.

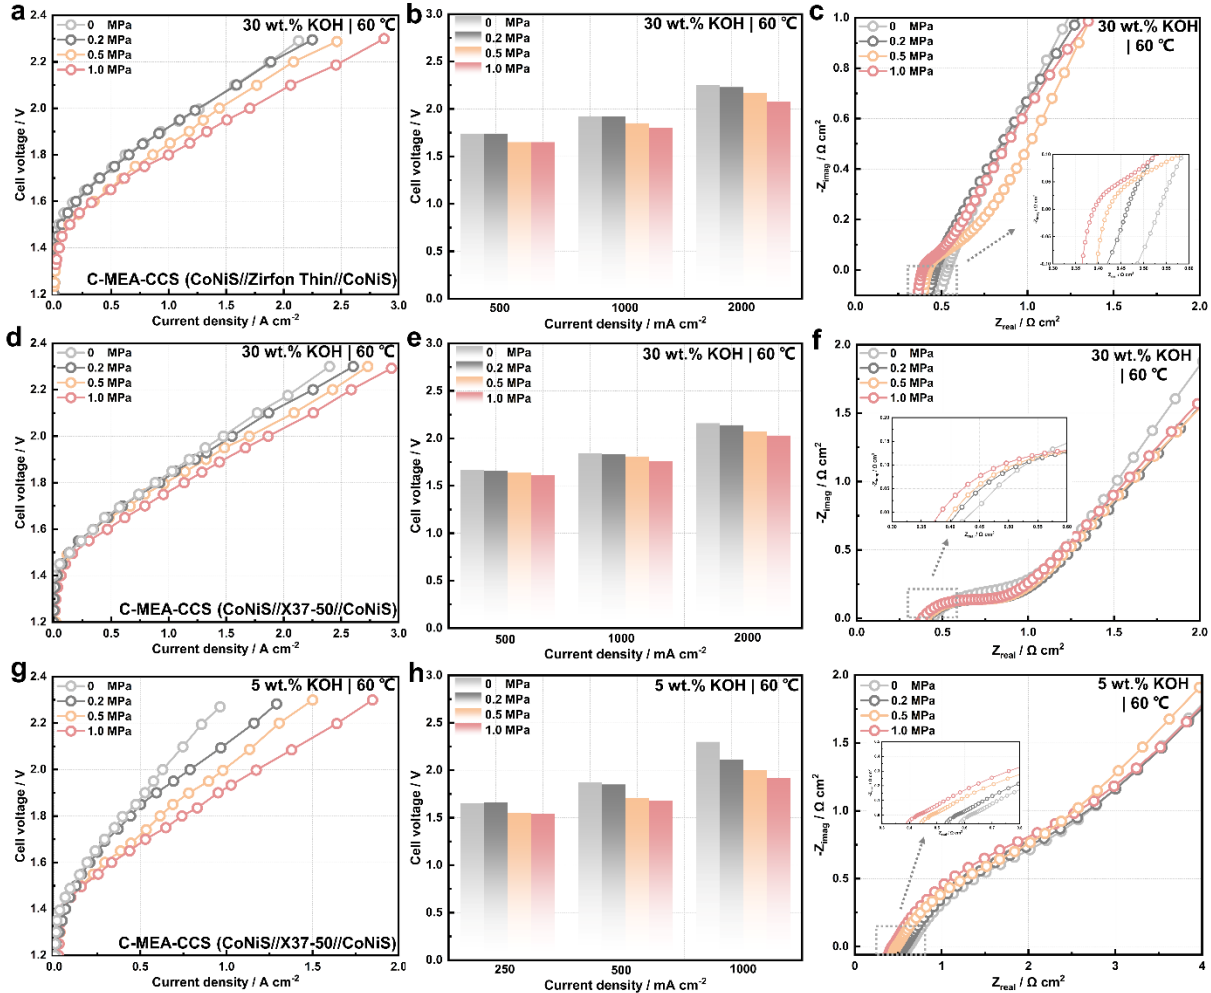

**Supplementary Fig. 2 | Performance of MEAs using different hot-pressing pressure.** C-MEA-CCS (CoNiS//Zirfon Thin//CoNiS) uses commercial Zirfon Thin (200  $\mu\text{m}$ ) and self-supported CoNiS as membrane and electrode, respectively; C-MEA-CCS (CoNiS//X37-50//CoNiS) uses commercial Sustainion X37-50 and self-supported CoNiS as membrane and electrode. There is no ionomer in the cathode and anode. (a) Polarization curves of C-MEA-CCS (CoNiS//Zirfon Thin//CoNiS) prepared by different hot-pressing pressure (0, 0.2, 0.5 and 1.0 MPa) in 30 wt.% KOH at 60  $^{\circ}\text{C}$ . (b) The cell voltage of MEAs with different hot-pressing pressure at various current density (500, 1000 and 2000  $\text{mA cm}^{-2}$ ). (c) Nyquist plot of MEAs with different hot-pressing pressure at 1.4  $V_{\text{cell}}$  in 30 wt.% KOH at 60  $^{\circ}\text{C}$ . (d) Polarization curves of C-MEA-CCS (CoNiS//X37-50//CoNiS) prepared by different hot-pressing pressure (0, 0.2, 0.5 and 1.0 MPa) in 30 wt.% KOH at 60  $^{\circ}\text{C}$ . (e) The cell voltage of C-MEA-CCS

(CoNiS//X37-50//CoNiS) with different hot-pressing pressure at various current density (500, 1000 and 2000 mA cm<sup>-2</sup>). (f) Nyquist plot of C-MEA-CCS (CoNiS//X37-50//CoNiS) with different hot-pressing pressure at 1.4 V<sub>cell</sub> in 30 wt.% KOH at 60 °C. (g) Polarization curves of C-MEA-CCS (CoNiS//X37-50//CoNiS) prepared by different hot-pressing pressure (0, 0.2, 0.5 and 1.0 MPa) in 5 wt.% KOH at 60 °C. (e) The cell voltage of C-MEA-CCS (CoNiS//X37-50//CoNiS) with different hot-pressing pressure at various current density (250, 500 and 1000 mA cm<sup>-2</sup>). (f) Nyquist plot of MEAs with different hot-pressing pressure at 1.4 V<sub>cell</sub> in 5 wt.% KOH at 60 °C.

### Supplementary Note 1

To further investigate the impact of the interfacial resistance on the performance of conventional MEA-CCS (C-MEA-CCS) using Zirfon membrane and self-supported electrodes, we utilized the hot-pressing method to regulate the binding force between self-supported electrodes and membranes. As shown in Supplementary Fig. 2a-b, the introduction of hot pressing will increase the electrolysis performance of MEAs, especially at high current densities. Furthermore, to characterize the ohmic resistances in MEAs, EIS was performed at 1.4 V (Supplementary Fig. 2c). The intercept in the high-frequency region represents the ohmic resistance, which consists of the ionic and electronic resistances. Improving the hot-pressing pressure reduced the ohmic resistance of cell.

We also investigated the impact of the interfacial resistance on the performance of C-MEA-CCS using Sustainion X37-50 membranes and self-supported electrodes. Supplementary Fig. 1 exhibited SEM images of the AEM/electrode interface after hot pressing under different pressures. It can be observed that the interface distance decreased as improving the hot-pressing pressure from 0 to 1.0 MPa. When 30 wt% KOH solution was used as the electrolyte, MEAs-CCS with different hot-pressing pressures showed discrepant electrolysis performance (Supplementary Fig.

2d). Typically, the MEA with 1.0 MPa showed cell voltage of 1.61, 1.76, and 2.03 V at different current densities of 500, 1000, and 2000 mA cm<sup>-2</sup>, which were lower than that (1.67, 1.84, and 2.16 V) of the MEA with 0.1 MPa (Supplementary Fig. 2e). Furthermore, to characterize the ohmic resistances in MEAs, EIS was performed at 1.4 V (Supplementary Fig. 2f). Improving the hot-pressing pressure reduced the ohmic resistance of cell. This result indicates that reducing the interfacial resistance between the electrode and the membrane can obviously improve the electrolysis performance. When 10 wt% KOH solution was used as the electrolyte, the electrolysis performance difference of MEAs-CCS with different hot-pressing pressures was significant (Supplementary Fig. 2g). Typically, the MEA with 1.0 MPa showed cell voltage of 1.54, 1.68 and 1.92 V at different current density of 250, 500 and 1000 mA cm<sup>-2</sup>, which are significantly lower than that (1.65, 1.87 and 2.3 V) of the MEA with 0.1 MPa (Supplementary Fig. 2h). Improving the hot-pressing pressure can significantly reduce the ohmic resistance of cells, especially at low-concentration KOH solution (Supplementary Fig. 2i).

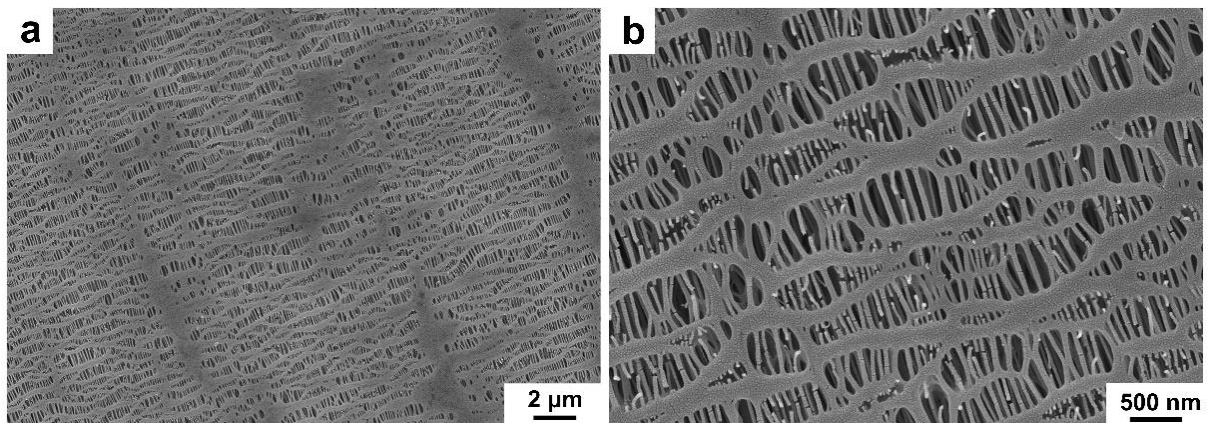

**Supplementary Fig. 3 | Scanning electron microscopy (SEM) analysis of polypropylene (PP) membrane. (a-b) The SEM images of pristine PP porous membranes.**



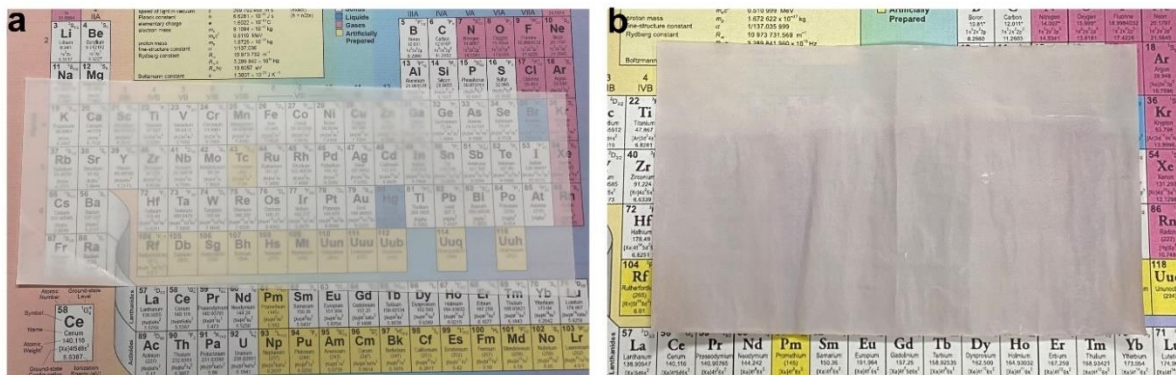

**Pristine PP separator**

**All-in-one MEA-L**

**Supplementary Fig. 4 | Photographic images of PP separator and all-in-one MEA-L.** Photographs of (a) pristine PP separator (size: 40 cm × 20 cm; thickness: ~20 cm) and (b) all-in-one MEA-L (size: 40 cm × 20 cm; thickness: ~26 cm).

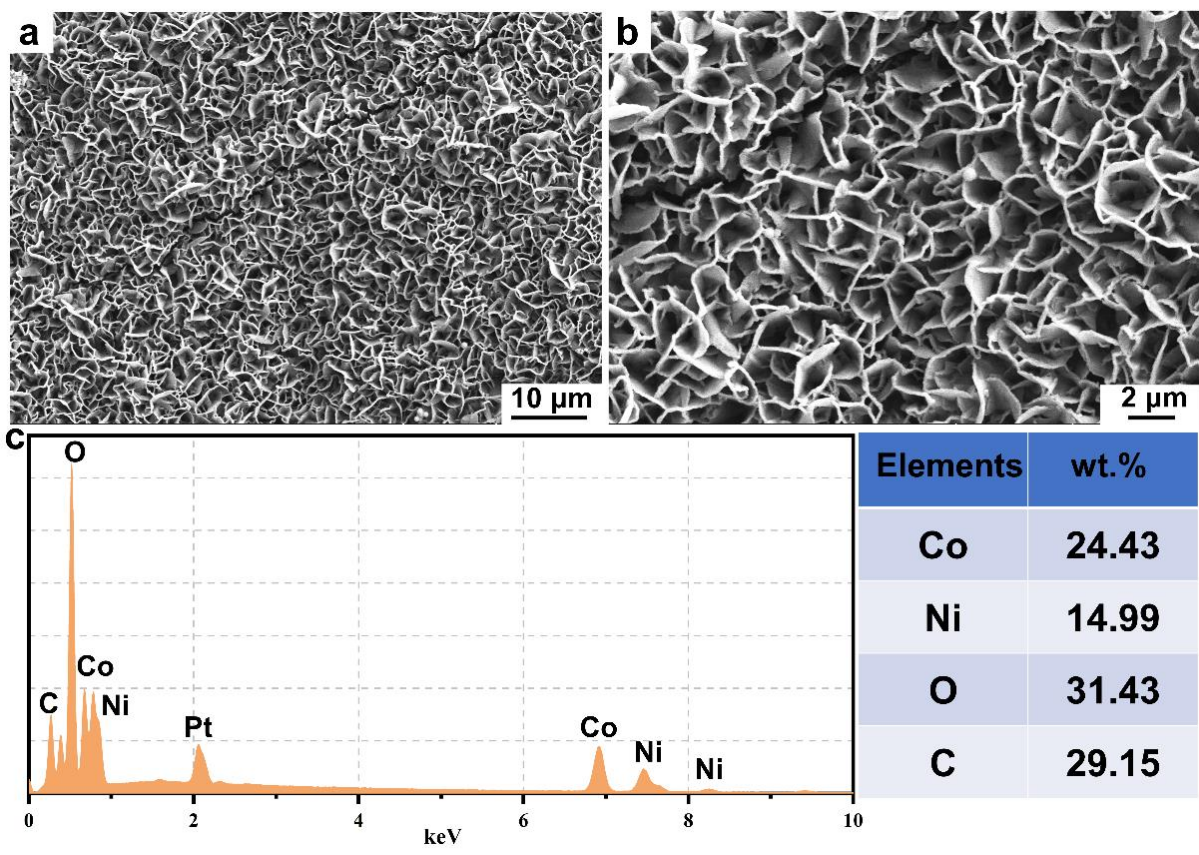

**Supplementary Fig. 5 | SEM analysis of all-in-one MEA-L.** SEM images of (a-b) catalyst layer morphologies of all-in-one MEA-L. (c) The EDS spectrum of the selected area in catalyst layer surface of all-in-one MEA-L.

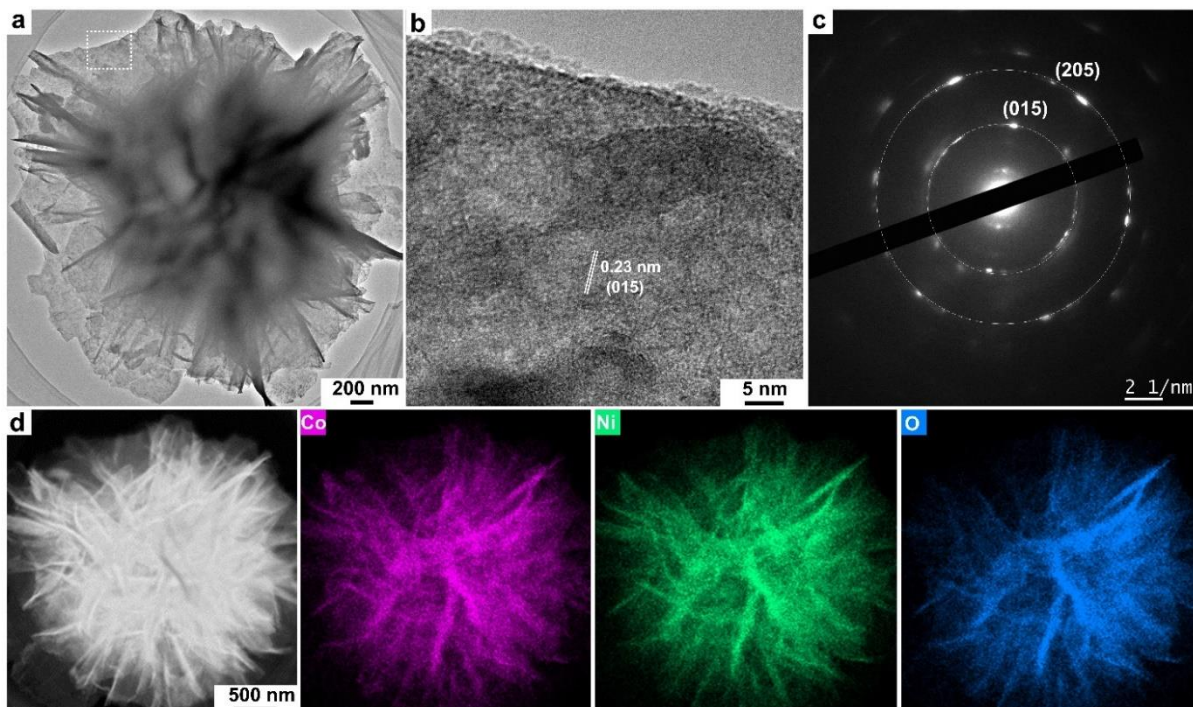

**Supplementary Fig. 6 | Structure characterization of CoNi LDH by transmission electron microscope (TEM).** (a) TEM and (b) high-resolution TEM images of CoNi LDH. (c) SAED pattern of CoNi LDH. (d) The corresponding elemental mapping images of Co, Ni and O in CoNi LDH.

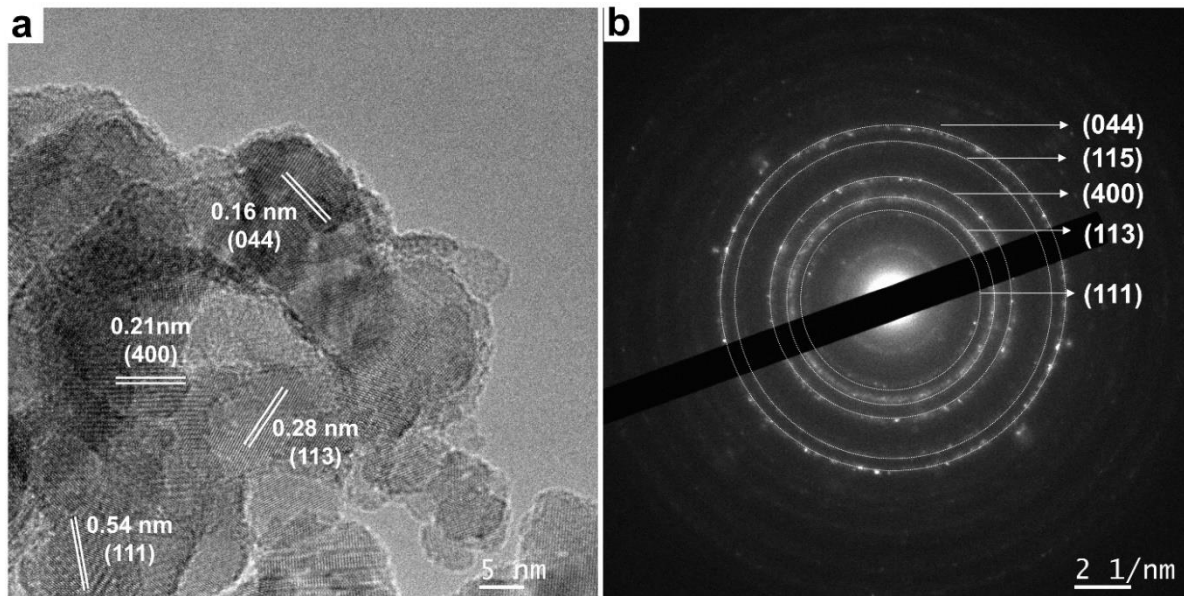

**Supplementary Fig. 7 | Structure characterization of CoNiS by TEM.** (a) The high-resolution TEM image of CoNiS nanosheets, and (b) the SAED pattern of the area in (a).



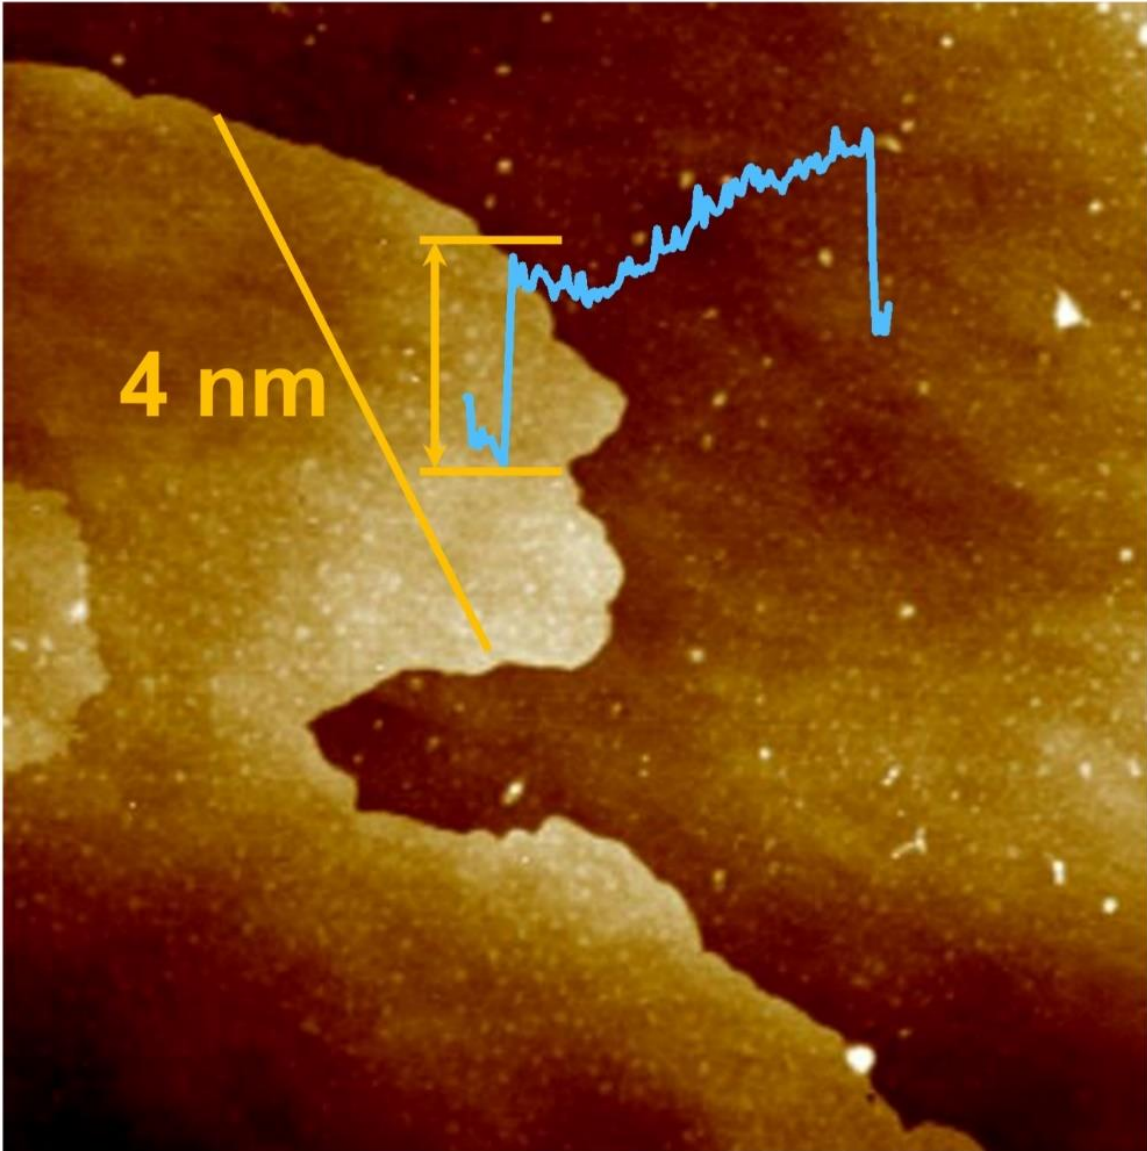

**Supplementary Fig. 8 | AFM characterization of CoNiS nanosheets.** AFM image of CoNiS nanosheets and corresponding height profile along the marked yellow line.

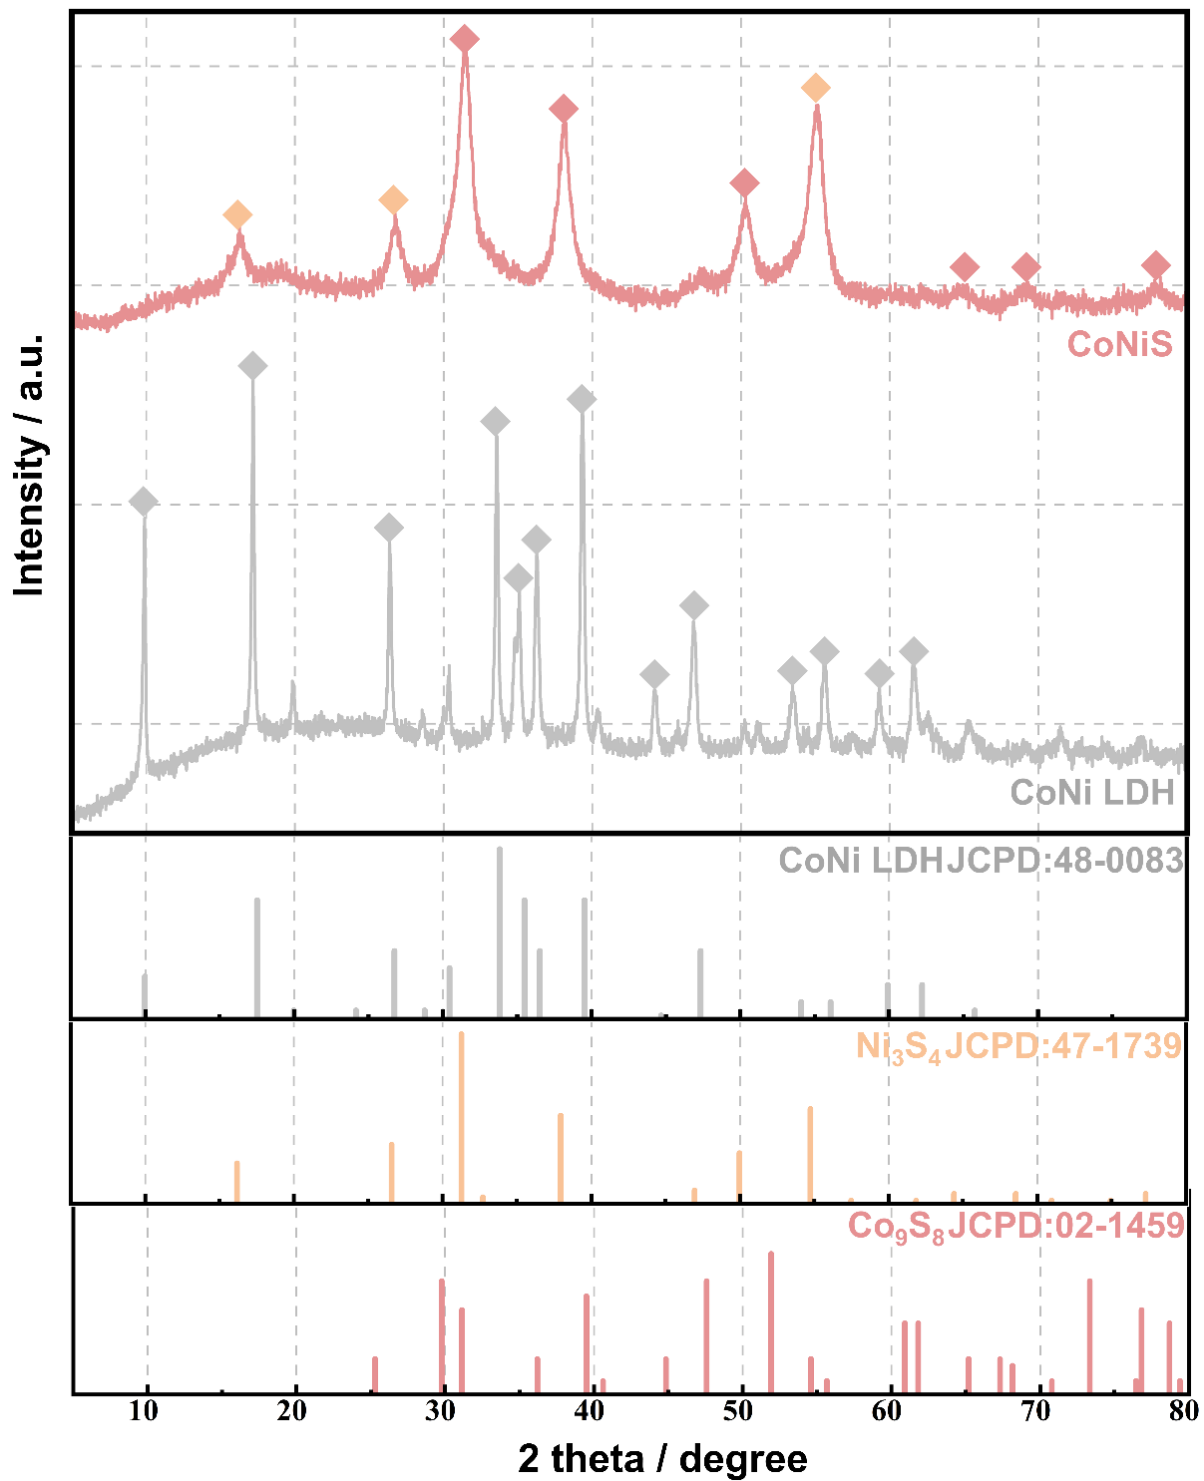

Supplementary Fig. 9 | XRD patterns. XRD patterns of CLs of all-in-one MEA-L and all-in-one MEA-S.

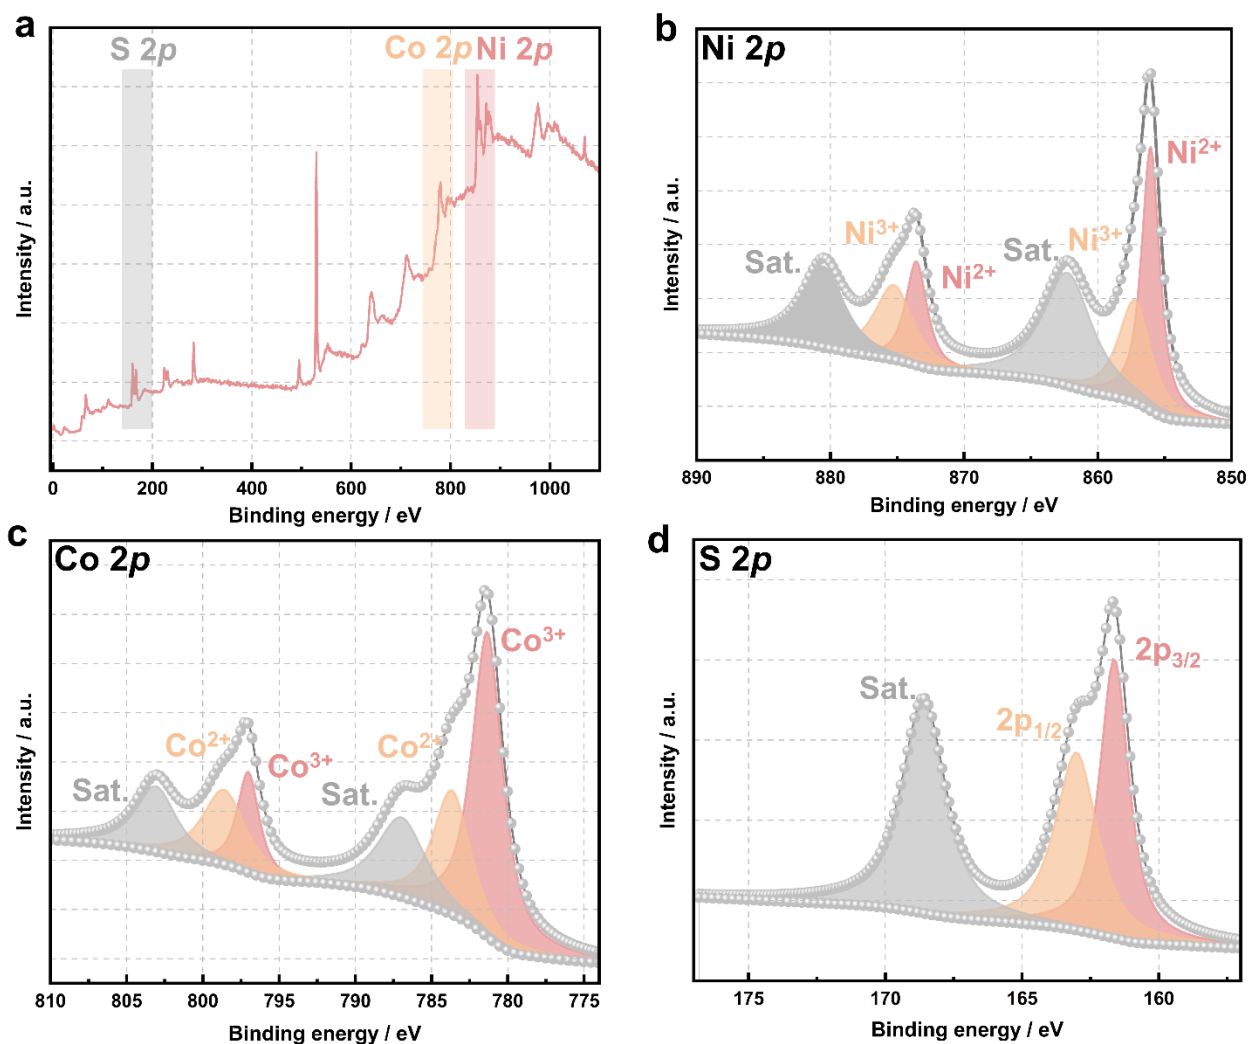

**Supplementary Fig. 10 | XPS spectra.** (a) XPS survey of CoNiS. High-resolution XPS spectra of (b) Ni 2p for CoNiS. High-resolution XPS spectra of (c) Co 2p for CoNiS. High-resolution XPS spectra of (d) S 2p for CoNiS.

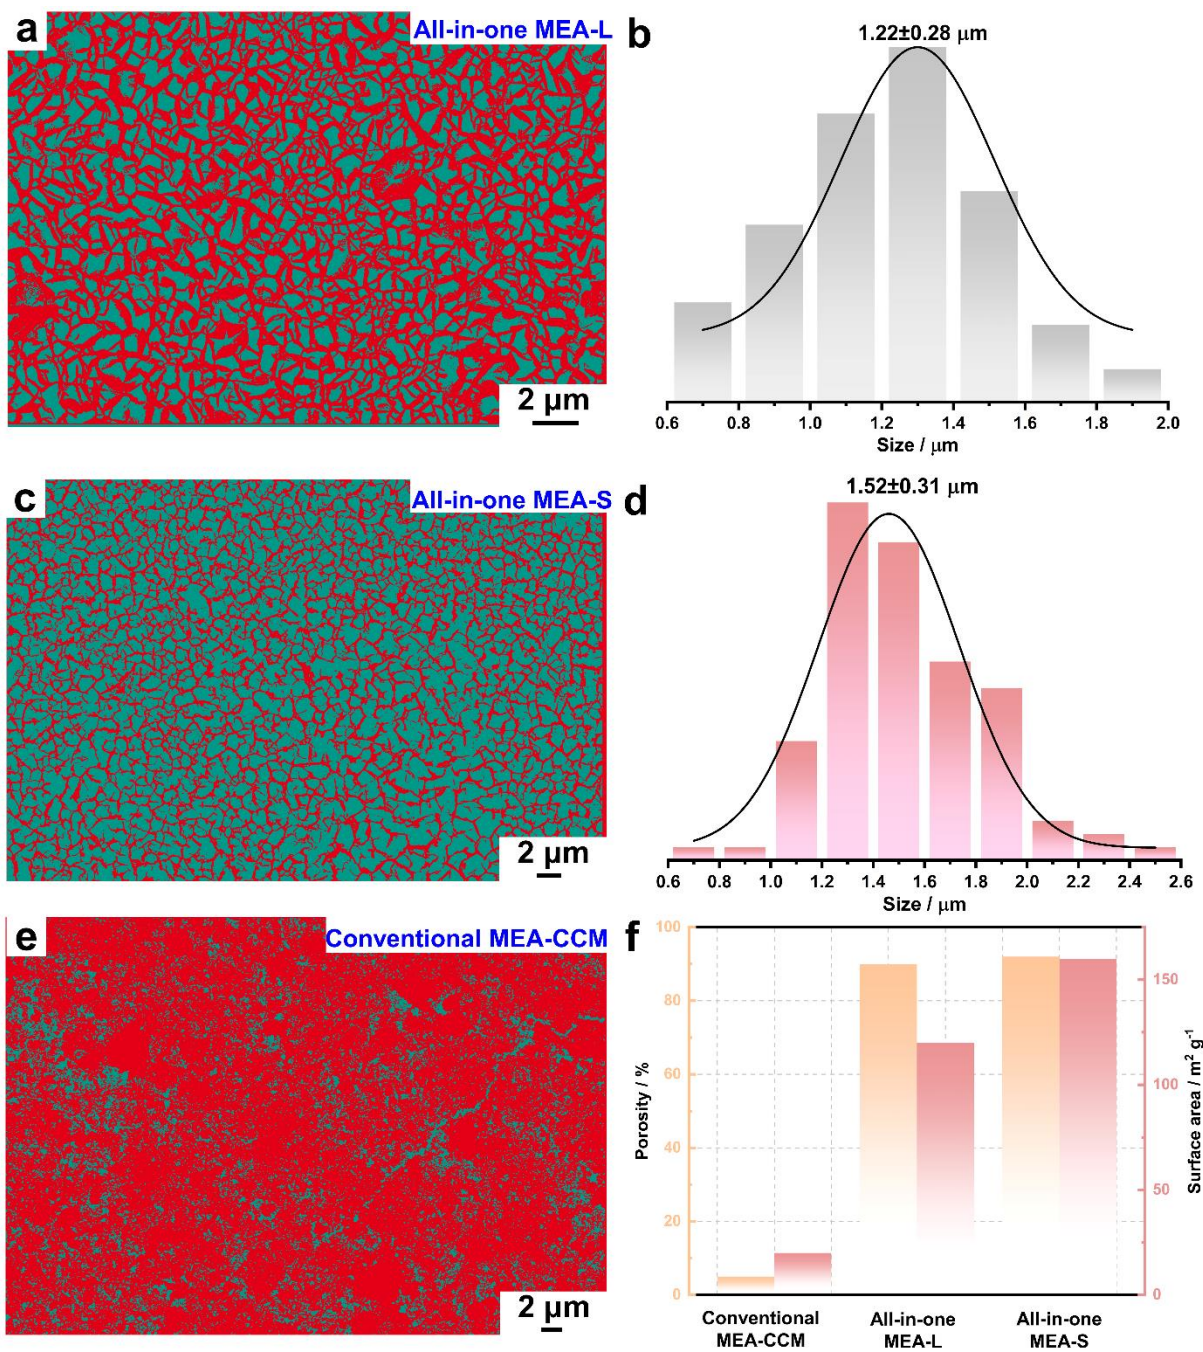

**Supplementary Fig. 11 | The CL images for porosity and pore structures analysis.** (a) all-in-one MEA-L, (c) all-in-one MEA-S and (e) conventional MEA-CCM (The green parts are pores; The red parts are solid catalysts). The pore size distribution of (b) all-in-one MEA-L and (d) all-in-one MEA-S. (f) The porosity and surface area of conventional MEA-CCM, all-in-one MEA-L and all-in-one MEA-S. Image analysis, i.e. the extraction of areal surface porosity (ASP), was performed using the Fiji distribution of the ImageJ software program. A Gaussian blur was applied to pristine SEM images to reduce the roughness of



the exterior surfaces and filter out small, illuminated intraporous surfaces while maintaining image integrity. A threshold was applied using the default method of the ImageJ threshold operation, then the image was inverted.

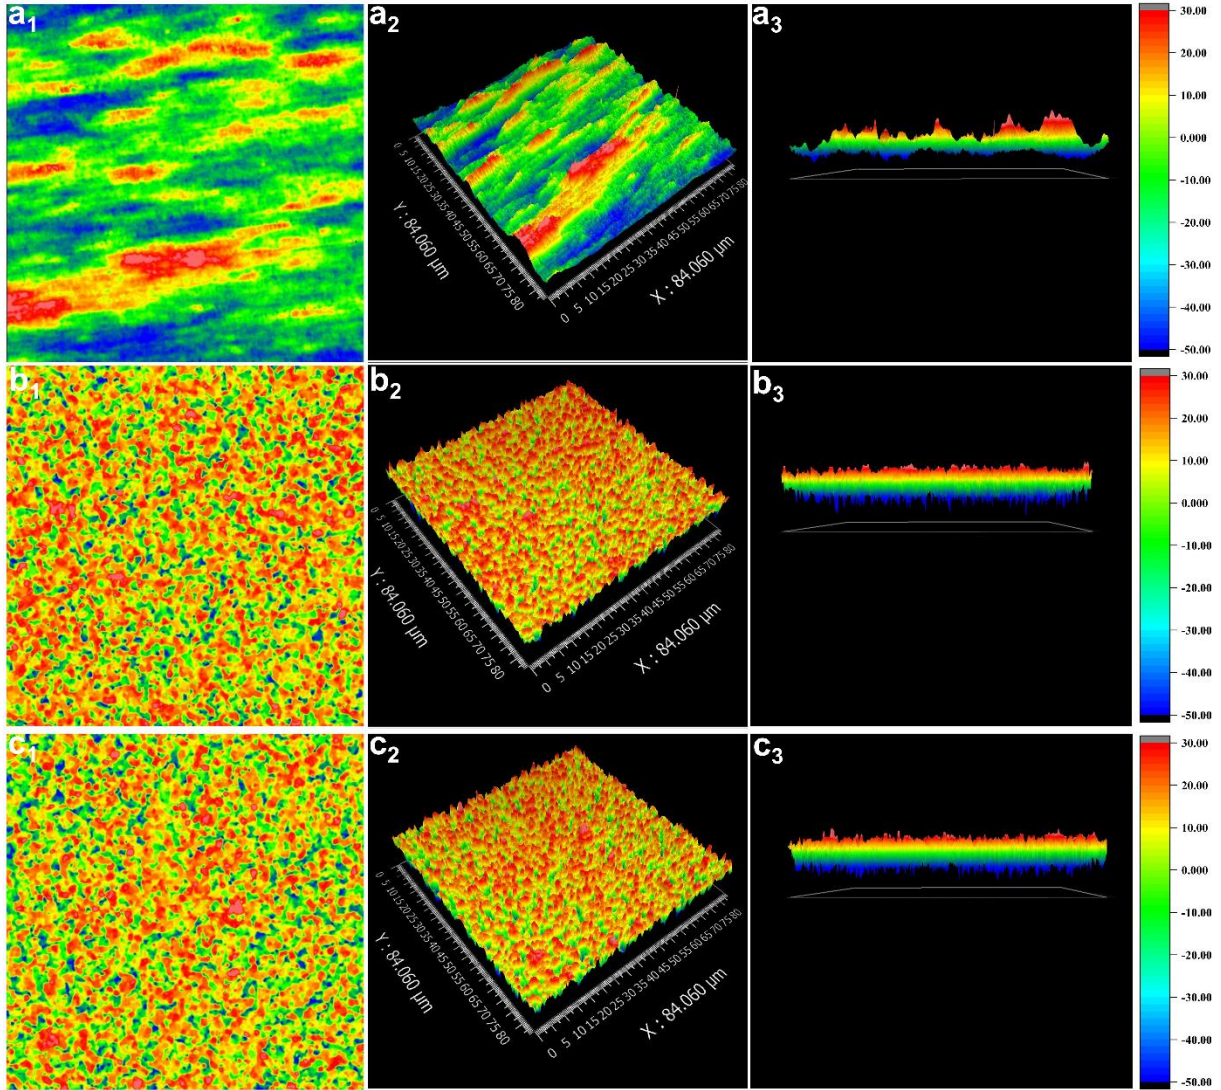

**Supplementary Fig. 12 | White light interferometry characterization of PP membrane and CLs structure of all-in-one MEAs. (a<sub>1</sub>) 2D and (a<sub>2</sub>-a<sub>3</sub>) 3D images of pristine PP porous membrane. (b<sub>1</sub>) 2D and (b<sub>2</sub>-b<sub>3</sub>) 3D images of all-in-one MEA-L. (c<sub>1</sub>) 2D and (c<sub>2</sub>-c<sub>3</sub>) 3D images of all-in-one MEA-S.**

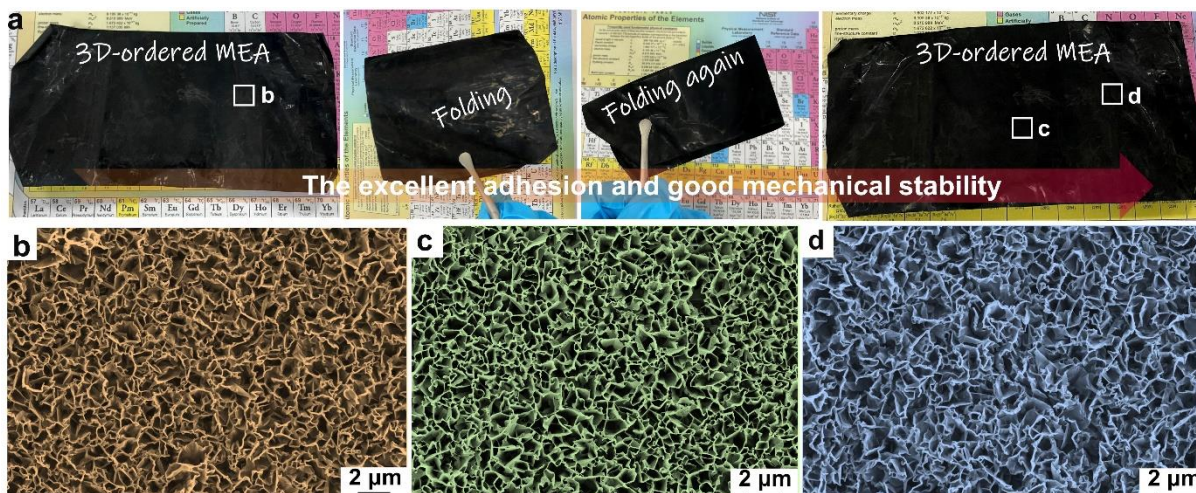

**Supplementary Fig. 13 | Mechanical toughness and catalyst layer adhesion tests of all-in-one MEA-**

**S.** (a) The all-in-one MEA-S (size: 40 cm × 20 cm; thickness: ~26 cm) recovers the shape without cracks even after the twisting and kneading tests. The corresponding SEM images of the representative areas (b), (c) and (d), respectively.

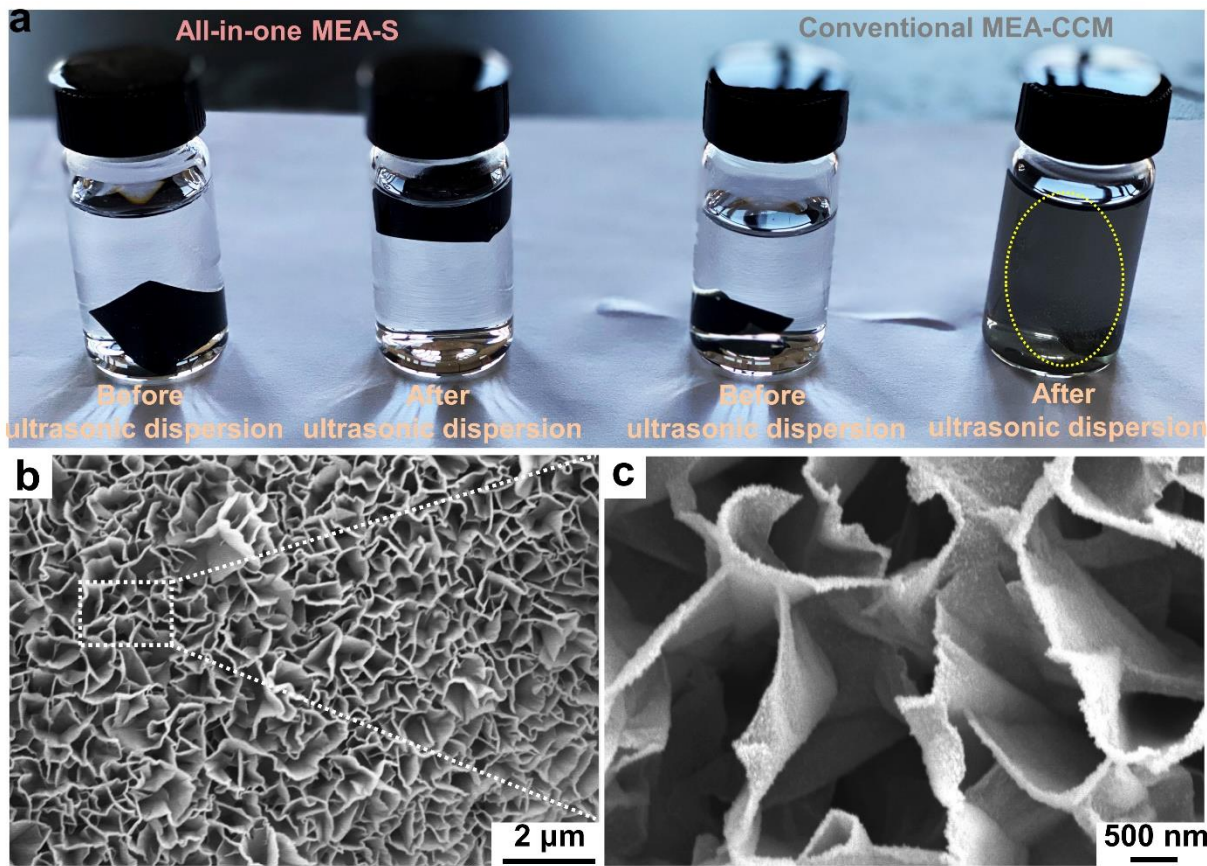

**Supplementary Fig. 14 | Catalyst layer adhesion tests using ultrasonic vibration method.** (a) The digital photographs of all-in-one MEA-S before and after ultrasonication for 10 min. (b-c) SEM images of catalyst layers of all-in-one MEA-S after ultrasonication for 10 min.



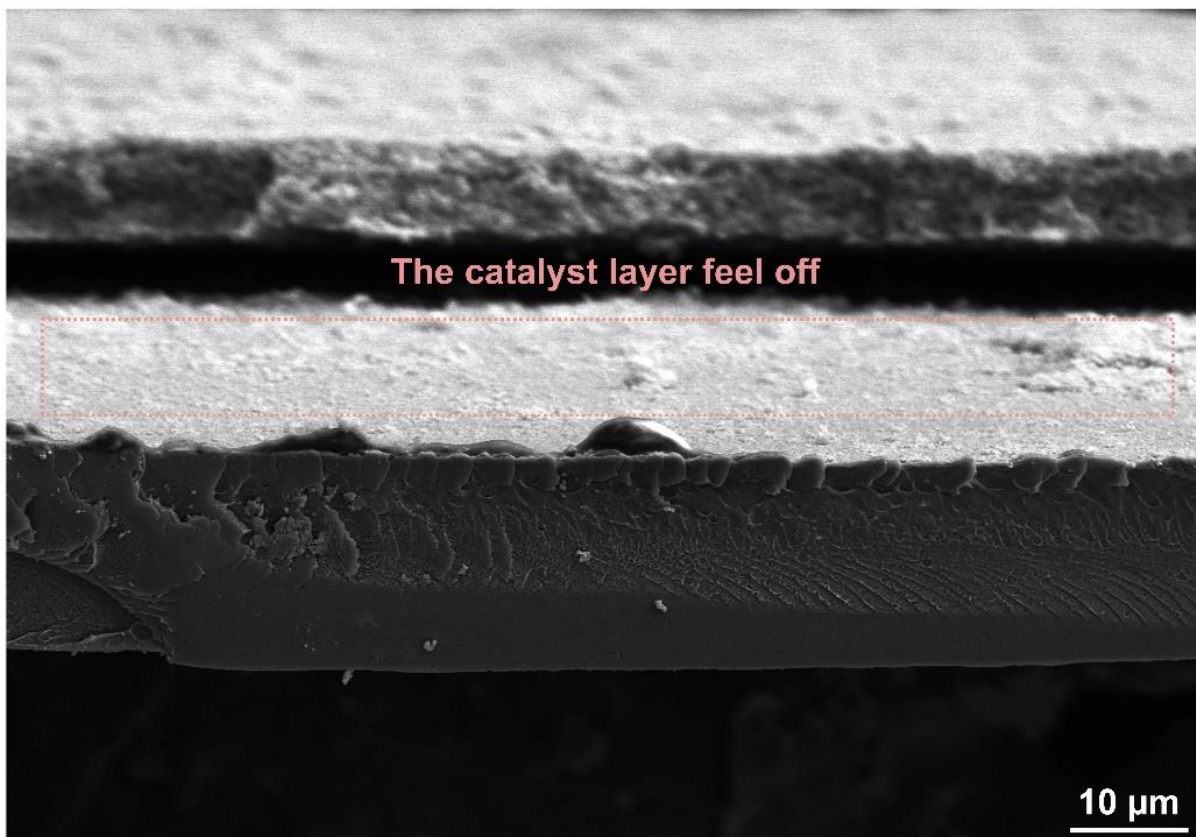

**Supplementary Fig. 15 | SEM analysis of conventional MEA-CCM (C-MEA-CCM).** SEM images of catalyst layer of the C-MEA-CCM after ultrasonication.

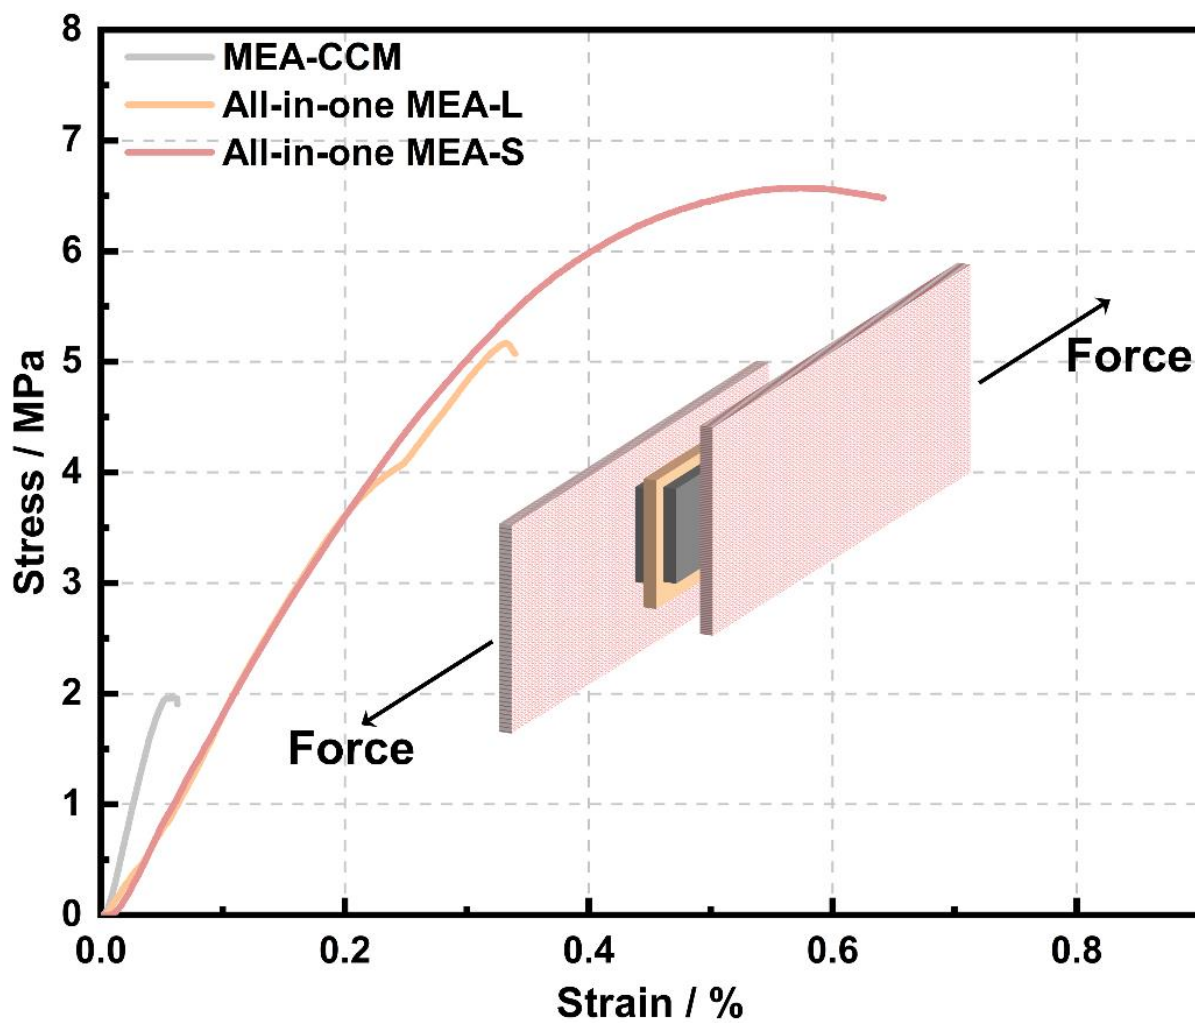

**Supplementary Fig. 16 | Catalyst layer adhesion tests.** Tensile stress–strain curves for shear testing of the dry conventional MEA-CCM, the dry all-in-one MEA-L, and the all-in-one MEA-S.

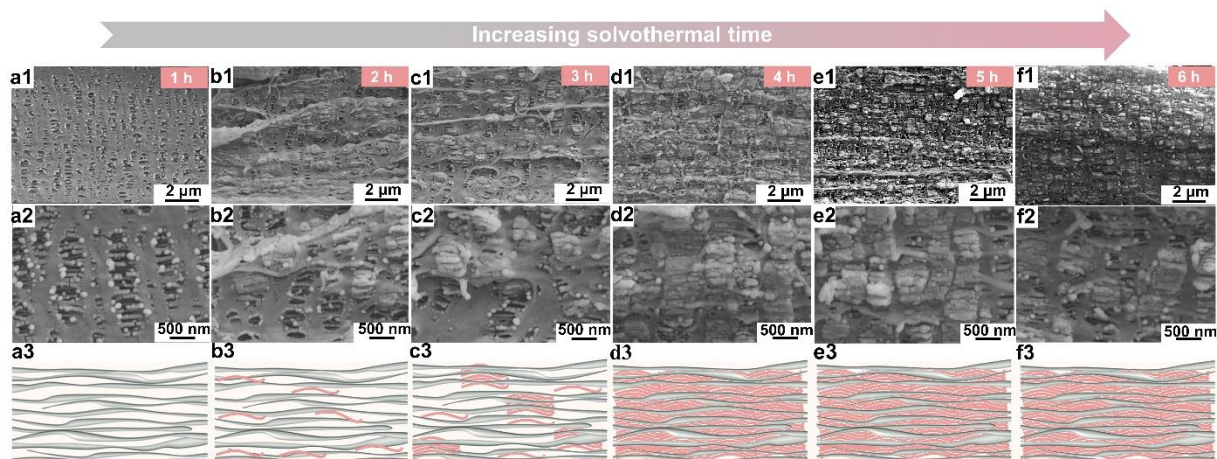

**Supplementary Fig. 17 | SEM analysis of cross-sectional morphologies of all-in-one MEA-S with different solvothermal time. (a1-a2) 1 h, (b1-b2) 2 h, (c1-c2) 3 h, (d1-d2) 4 h, (e1-e2) 5 h and (f1-f2) 6 h.**

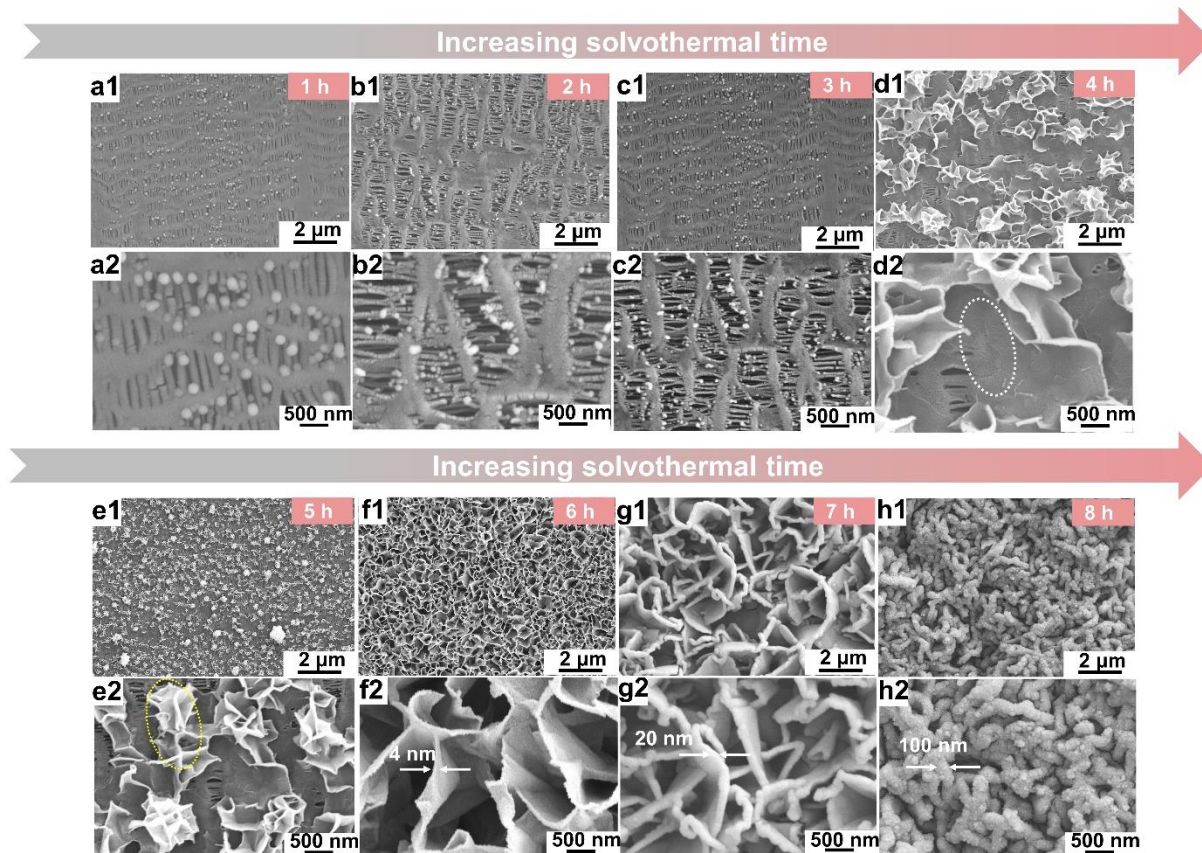

**Supplementary Fig. 18 | SEM analysis of catalyst layer morphologies of all-in-one MEA-S with different solvothermal time.** (a1-a2) 1 h, (b1-b2) 2 h, (c1-c2) 3 h, (d1-d2) 4 h, (e1-e2) 5 h, (f1-f2) 6 h, (g1-g2) 7 h and (h1-h2) 8 h.



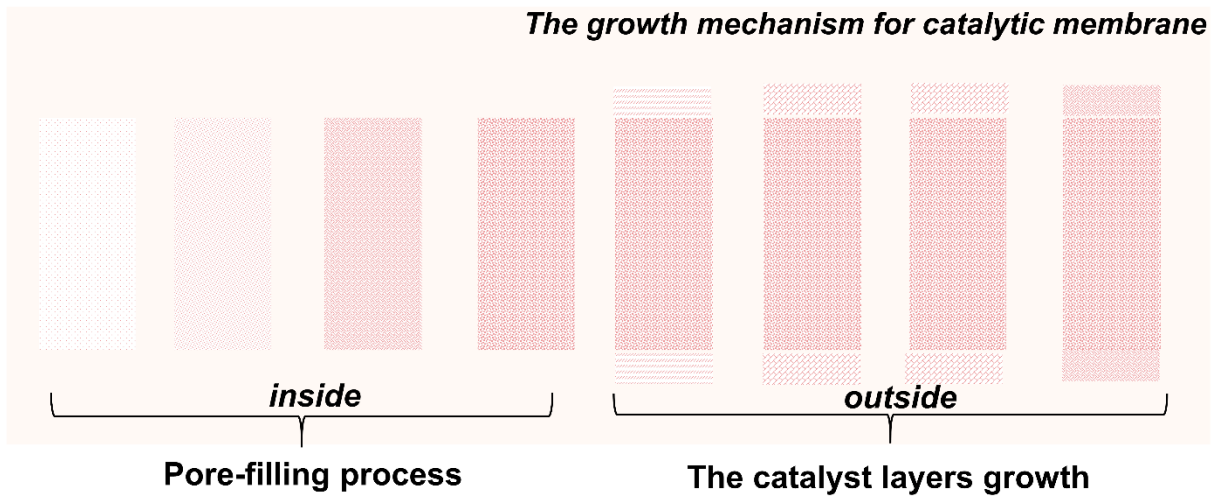

**Supplementary Fig. 19 | Schematic diagrams of the growth mechanism for catalytic membrane.** The oriented intergrowth process of catalyst layer in MEA can be divided into two stages: the pore-filling process and the catalyst layer growth on membrane.

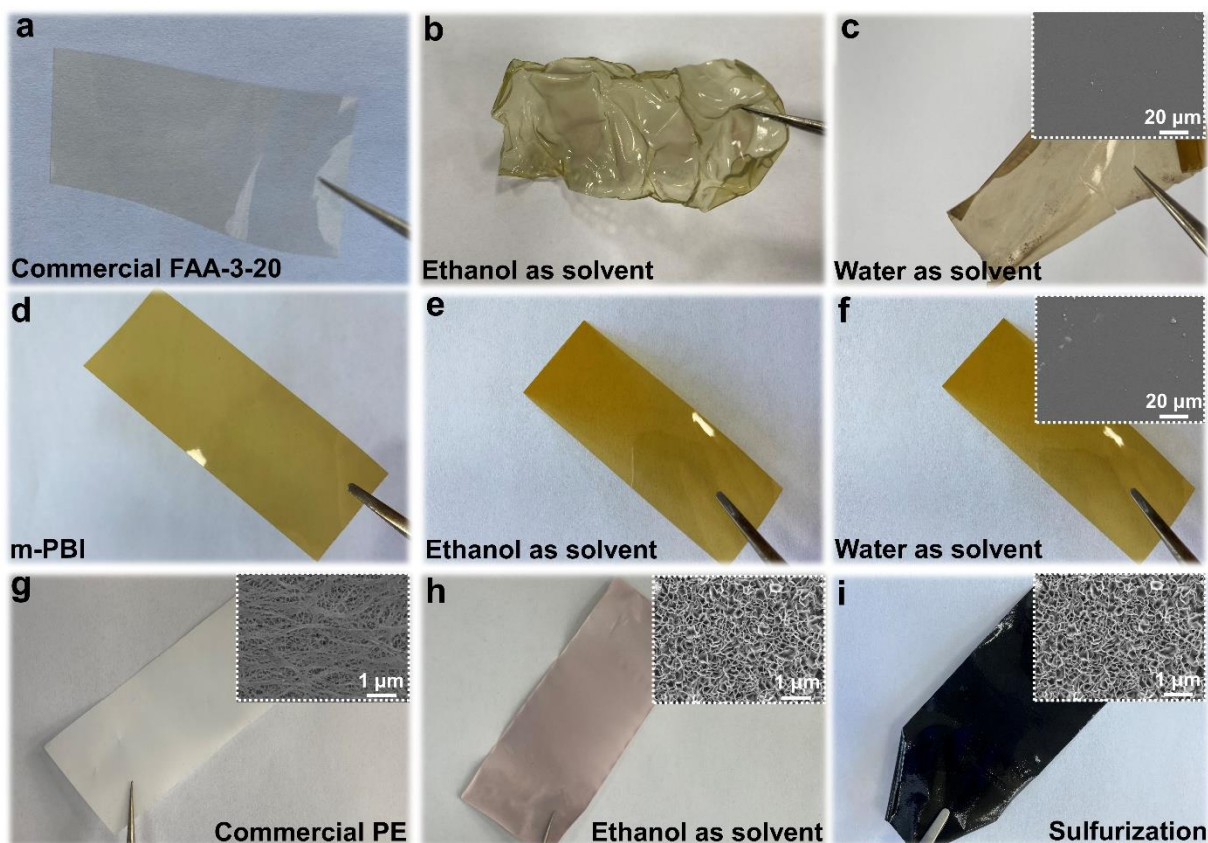

**Supplementary Fig. 20 | Photographic images of different membranes before and after CL intergrowth process.** The digital photographs of (a) pristine commercial FAA-3-20 membrane, (b) commercial FAA-3-20 membrane after solvothermal reaction (ethanol as solvent), (c) commercial FAA-3-20 membrane after hydrothermal reaction (water as solvent), (d) pristine PBI membrane, (e) PBI membrane after solvothermal reaction (ethanol as solvent), (f) PBI membrane after hydrothermal reaction (water as solvent), (g) commercial PE membrane, (h) commercial PE membrane after solvothermal reaction (ethanol as solvent) and (i) commercial PE membrane after sulfurization treatment.

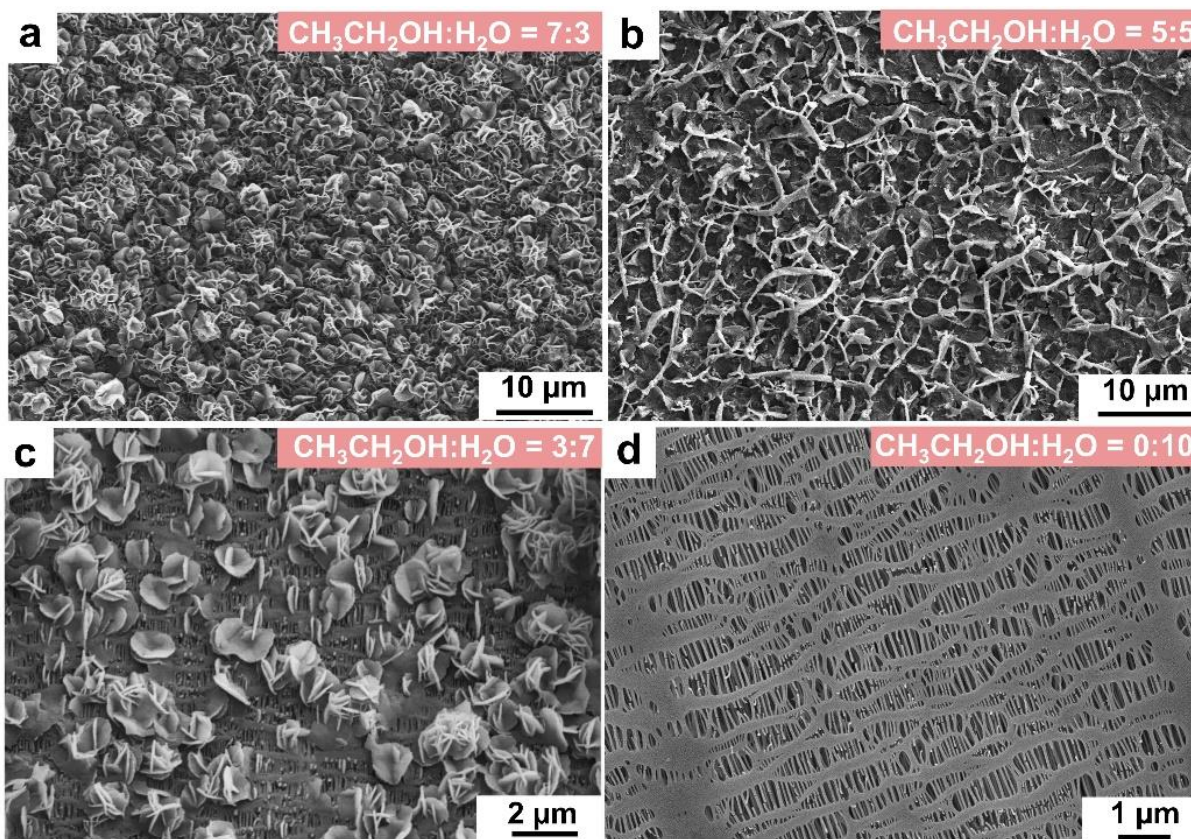

**Supplementary Fig. 21 | SEM analysis of all-in-one MEA-S.** SEM images of catalyst layer surface morphologies of all-in-one MEA-S with different ratio of ethanol and water: (a) ethanol : H<sub>2</sub>O = 7:3, (b) ethanol : H<sub>2</sub>O = 5:5, (c) ethanol : H<sub>2</sub>O = 3:7 and (d) ethanol : H<sub>2</sub>O = 0:10.

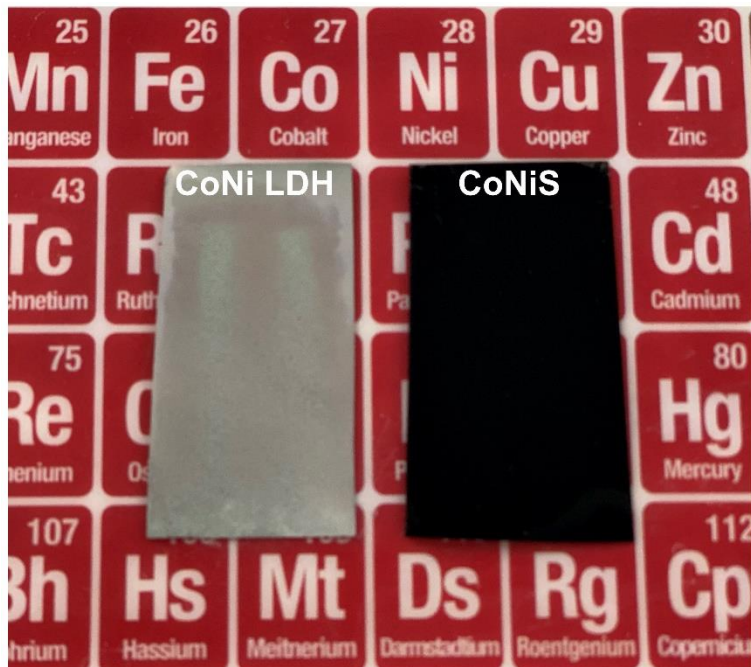

**Supplementary Fig. 22 | Photographic images of CoNi LDH/Ni foil and CoNiS/Ni foil.**



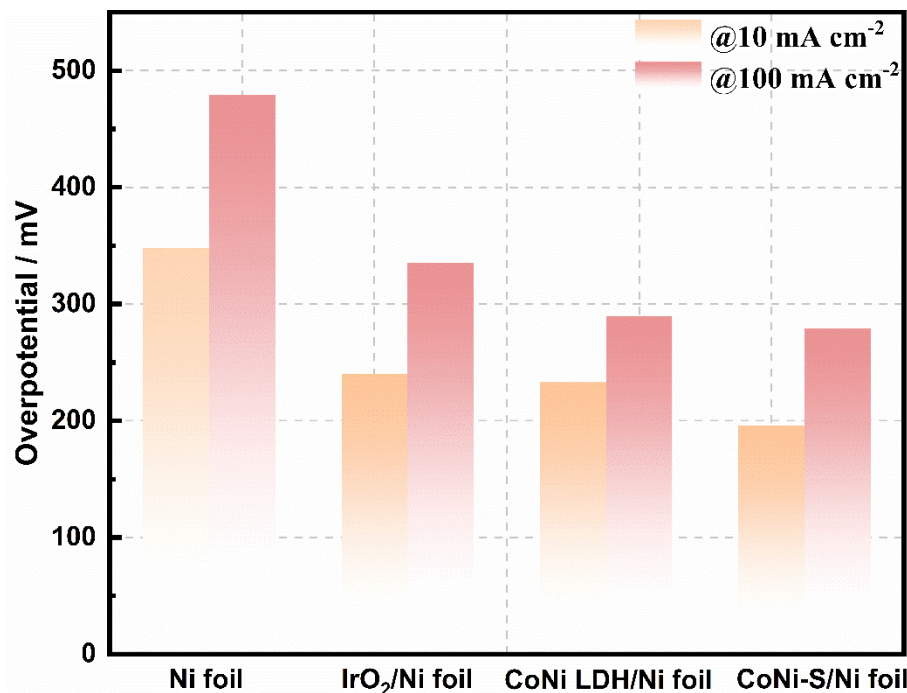

**Supplementary Fig. 23 | OER overpotential analysis of catalysts at different current densities.** The overpotentials of Ni foil, commercial IrO<sub>2</sub>/Ni foil, CoNi LDH/Ni foil and CoNiS/Ni foil at 10 and 100 mA cm<sup>-2</sup> towards OER.

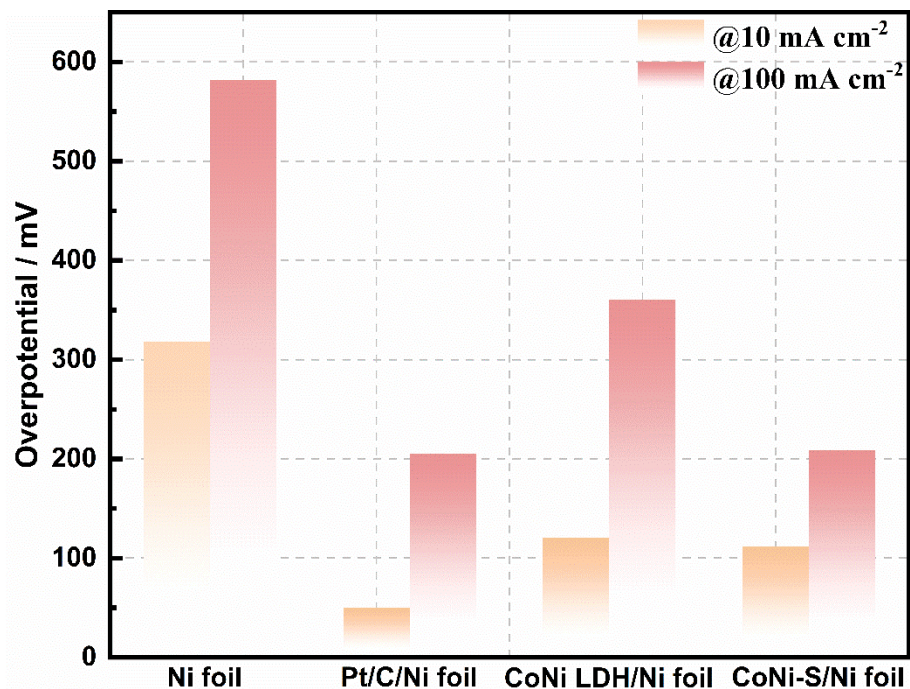

**Supplementary Fig. 24 | HER overpotential analysis of catalysts at different current densities.** The overpotential of Ni foil, commercial Pt/C/Ni foil, CoNi LDH/Ni foil and CoNiS/Ni foil at 10 and 100 mA cm<sup>-2</sup> towards HER.

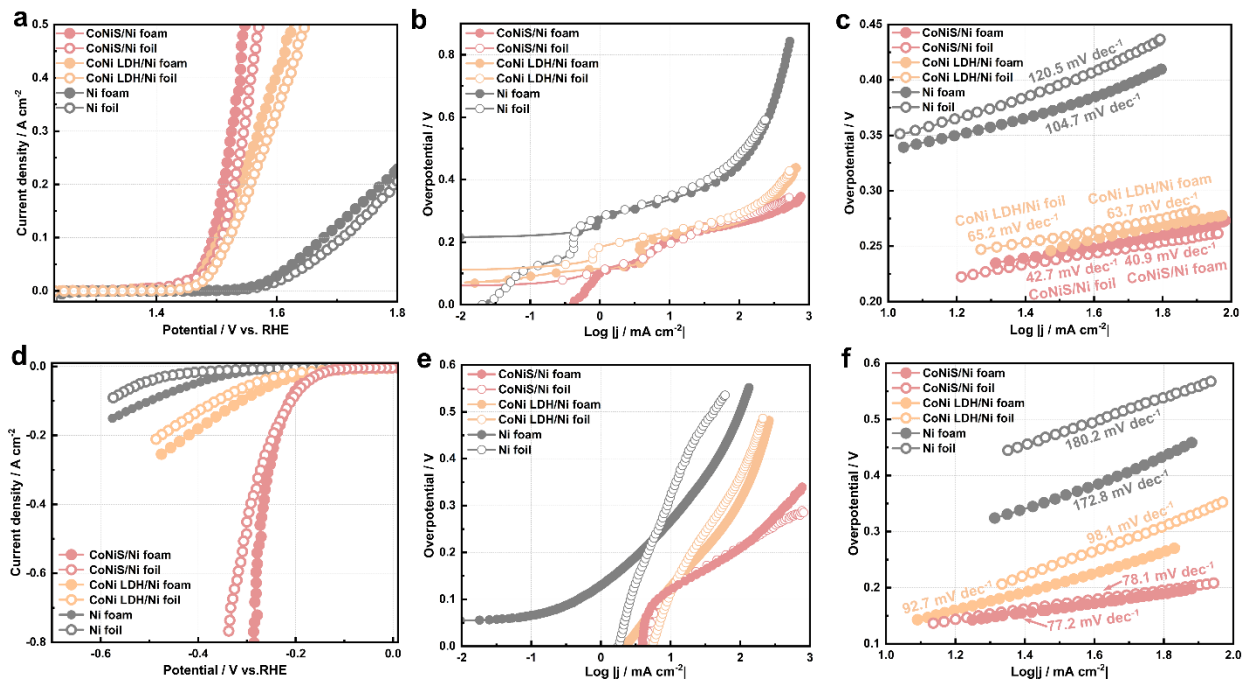

**Supplementary Fig. 25 | Electrocatalytic properties for OER and HER.** (a) OER polarization curves of CoNiS/Ni foam, CoNiS/Ni foil, CoNi LDH/Ni foam, CoNi/Ni foil, Ni foam and Ni foil in 1.0 M KOH at a scan rate of 5 mV s<sup>-1</sup>. (b-c) The corresponding Tafel plots. (d) HER polarization curves of CoNiS/Ni foam, CoNiS/Ni foil, CoNi LDH/Ni foam, CoNi/Ni foil, Ni foam and Ni foil in 1.0 M KOH at a scan rate of 5 mV s<sup>-1</sup>. (e-f) The corresponding Tafel plots.

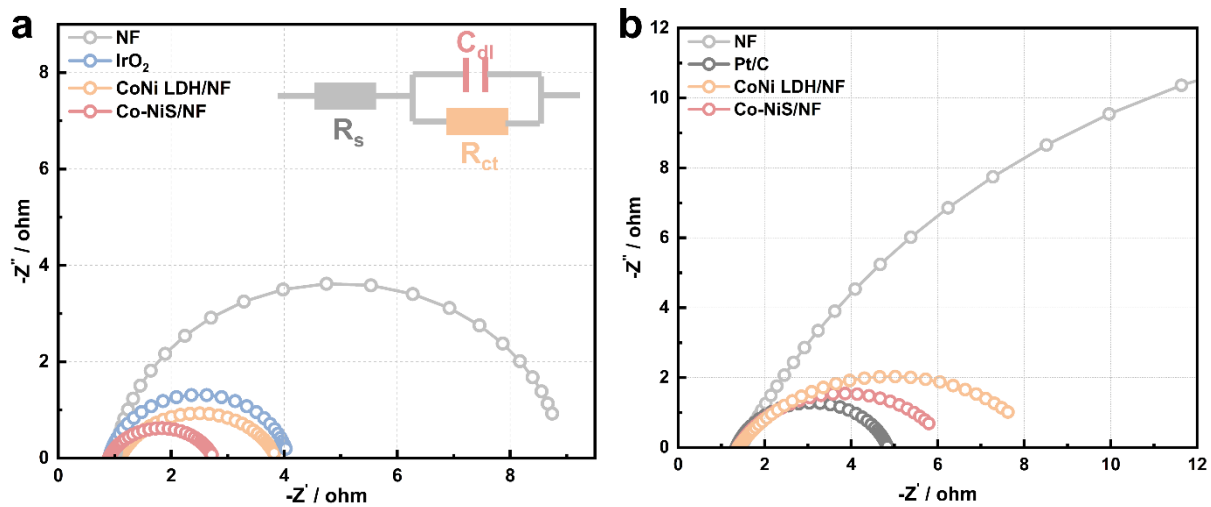

**Supplementary Fig. 26 | EIS analysis of catalysts.** (a) Nyquist plots of Ni foil, commercial IrO<sub>2</sub>/Ni foil, CoNi LDH/Ni foil and CoNiS/Ni foil for OER. (b) Nyquist plots of Ni foil, commercial Pt/C/Ni foil, CoNi LDH/Ni foil and CoNiS/Ni foil for HER.



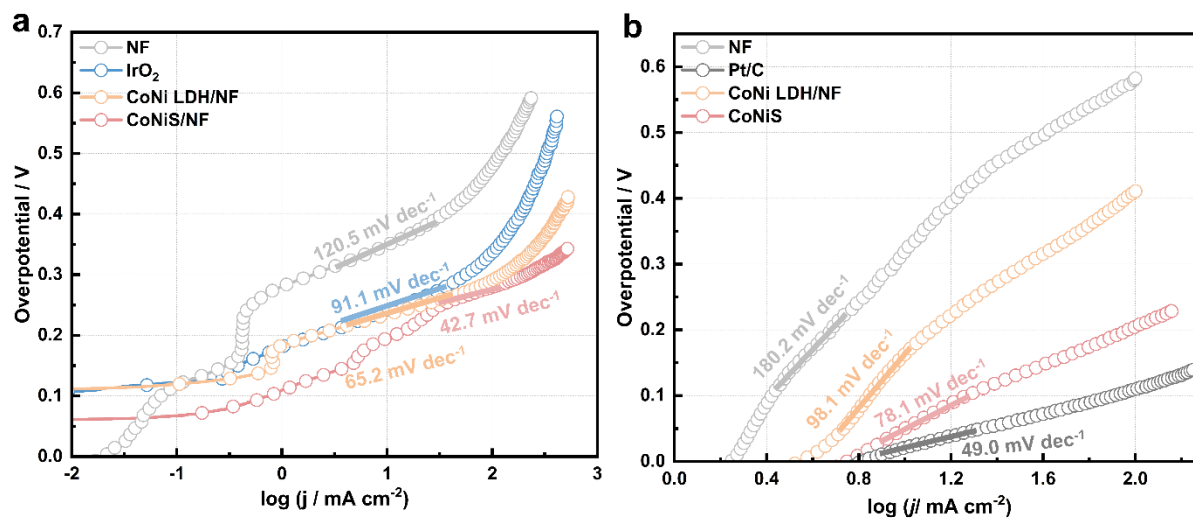

**Supplementary Fig. 27 | Tafel slope analysis of catalysts.** (a) Tafel plots for OER over Ni foil, commercial IrO<sub>2</sub>/Ni foil, CoNi LDH/Ni foil and CoNiS/Ni foil. (b) Tafel plots for HER over Ni foil, commercial Pt/C/Ni foil, CoNi LDH/Ni foil and CoNiS/Ni foil.

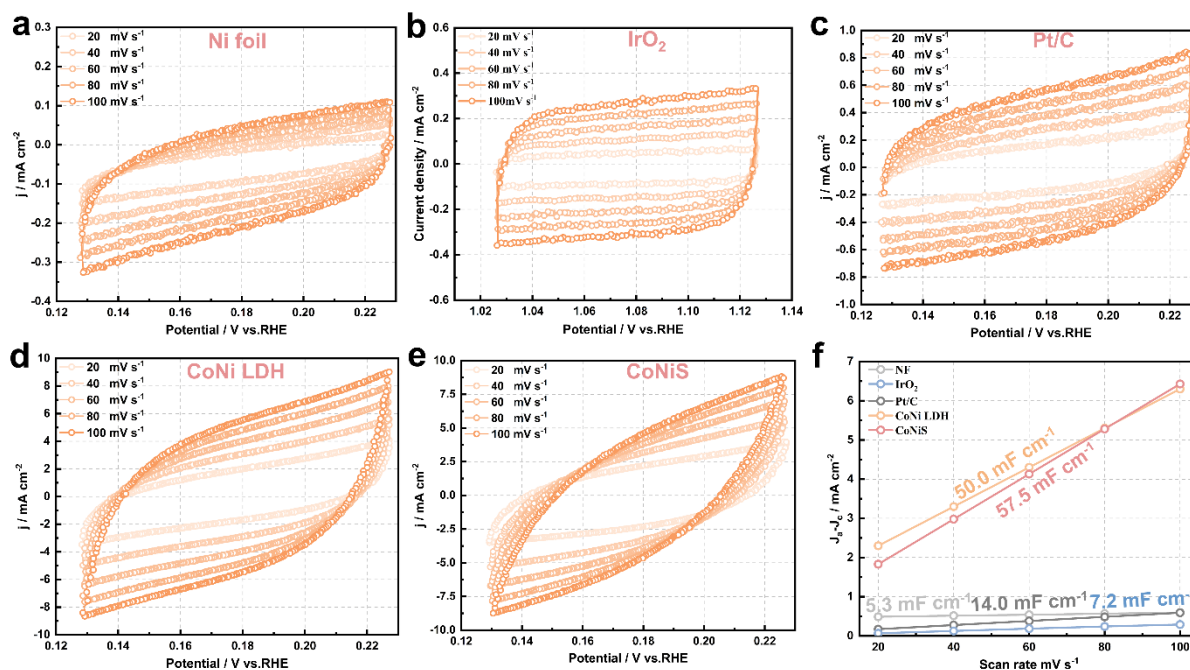

**Supplementary Fig. 28 | Electrochemically active surface area (ECSA) calculation.** Cyclic voltammetry (CV) curves of (a) Ni foil, (b) IrO<sub>2</sub>/Ni foil, (c) Pt/C, (d) CoNi LDH/Ni foil and (e) CoNiS/Ni foil with different scan rates (20–100 mV s<sup>-1</sup>). (f) Contrastive C<sub>dl</sub> of the catalysts obtained from CV curves with different scanning rates.

### Supplementary Note 2

To measure the electrochemical double layer capacitance of the samples, the current-potential curves were tested in a non-Faradaic HER or OER region of the voltammogram at speed rate of 20~100 mV s<sup>-1</sup>. The double layer charging current  $i$ , normalized on the geometric area of the electrode, is directly proportional to the scan rate  $v$  ( $i=vC_{dl}$ ). The double-layer capacitance ( $C_{dl}$ ) was derived as the linear fitted slope by plotting the current against the scan rate. The ECSA of the catalyst layer can be calculated ( $ECSA= C_{dl}/C_s$ ). Here, the specific capacitances ( $C_s$ ) were chosen as  $C_s= 0.04 \text{ mF cm}^{-2}$  based on typical reported values.

Ni foil:

$$A_{ECSA}^{NF} = \frac{5.3 \text{ mF cm}^{-2}}{40 \mu\text{F} \cdot \text{cm}^{-2} \text{ per cm}_{ECSA}^2} = 132.5 \text{ cm}_{ECSA}^2$$

IrO<sub>2</sub>:

$$A_{ECSA}^{IrO_2} = \frac{7.2 \text{ mF cm}^{-2}}{40 \mu\text{F} \cdot \text{cm}^{-2} \text{ per cm}_{ECSA}^2} = 180.0 \text{ cm}_{ECSA}^2$$

Pt/C:

$$A_{ECSA}^{Pt/C} = \frac{14.0 \text{ mF cm}^{-2}}{40 \mu\text{F} \cdot \text{cm}^{-2} \text{ per cm}_{ECSA}^2} = 350.0 \text{ cm}_{ECSA}^2$$

CoNi LDH:

$$A_{ECSA}^{CoNi LDH} = \frac{50.0 \text{ mF cm}^{-2}}{40 \mu\text{F} \cdot \text{cm}^{-2} \text{ per cm}_{ECSA}^2} = 1250.0 \text{ cm}_{ECSA}^2$$

CoNiS:

$$A_{ECSA}^{CoNiS} = \frac{57.5 \text{ mF cm}^{-2}}{40 \mu\text{F} \cdot \text{cm}^{-2} \text{ per cm}_{ECSA}^2} = 1437.5 \text{ cm}_{ECSA}^2$$

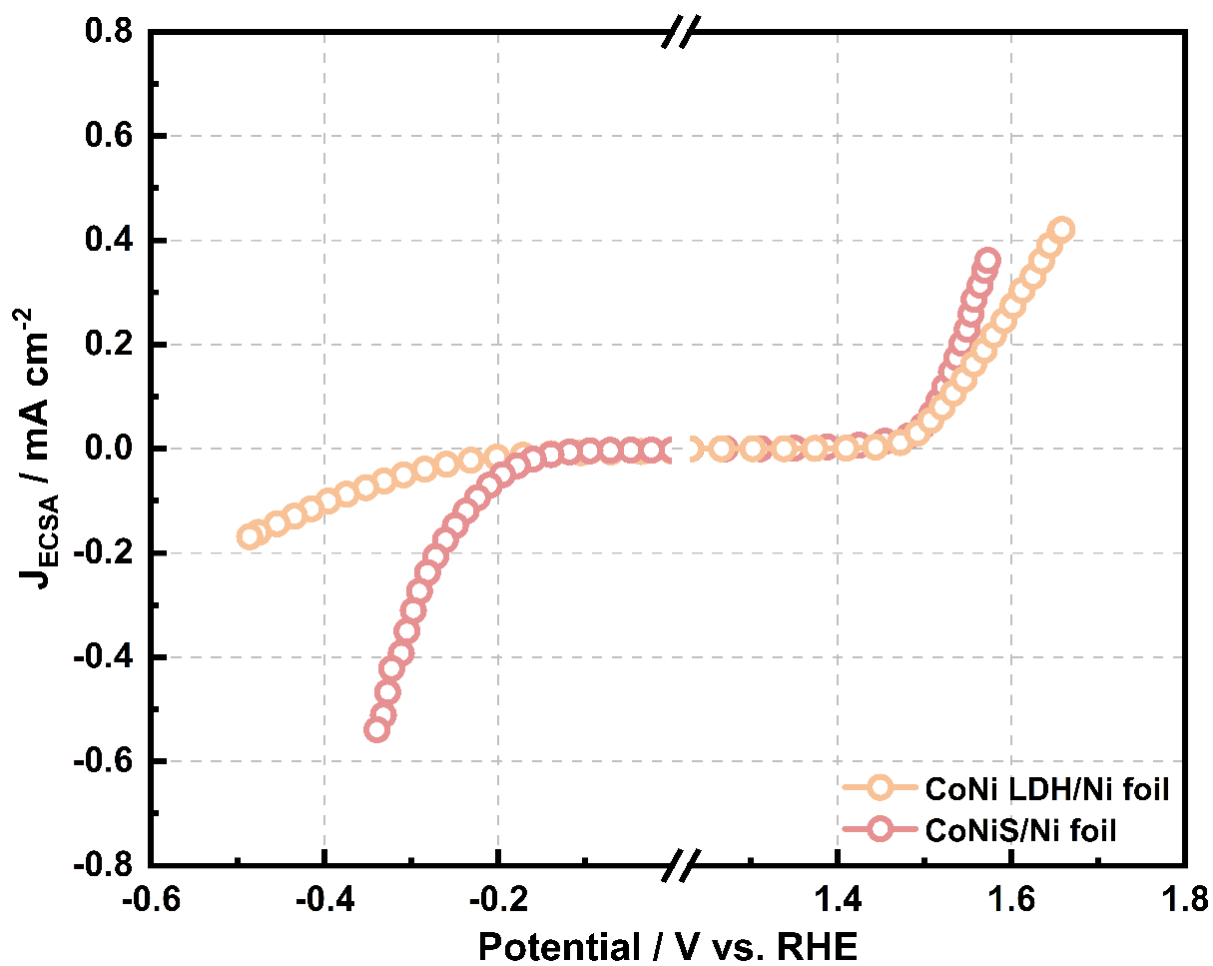

**Supplementary Fig. 29 | Polarization curves normalized by ECSA.** Linear sweep voltammograms (LSV) curves of CoNi LDH/Ni foil and CoNiS/Ni foil for OER and HER.

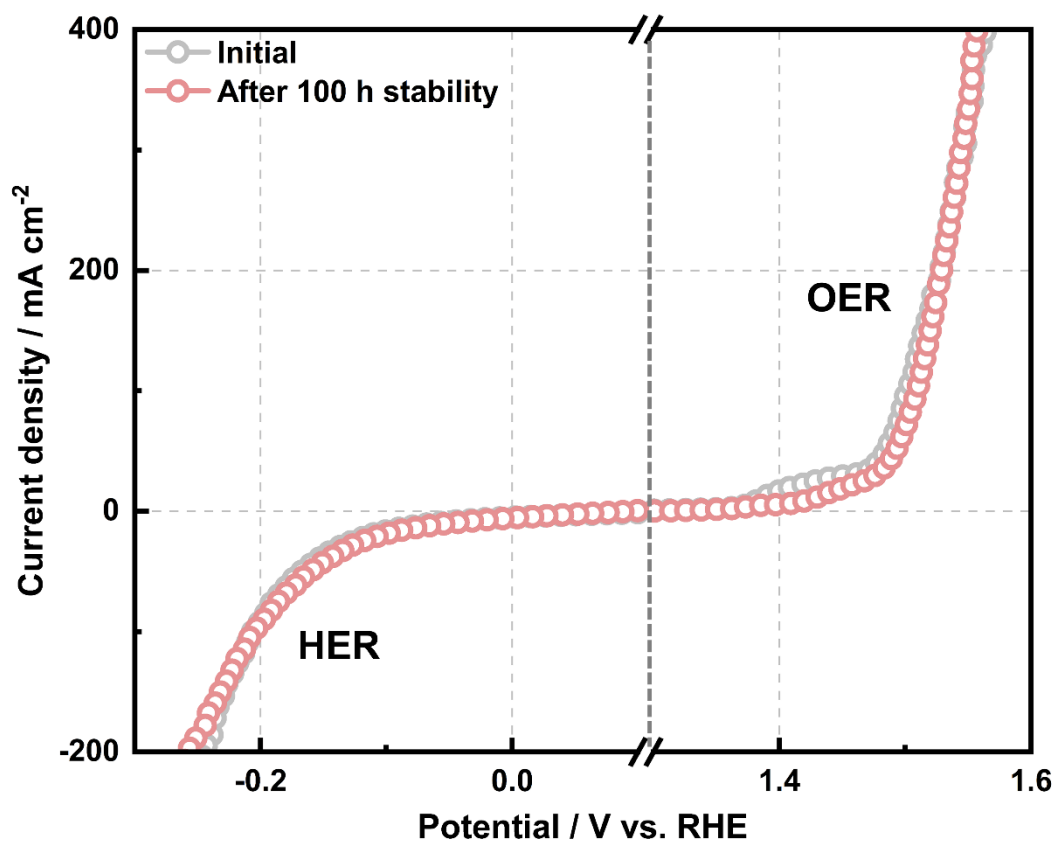

**Supplementary Fig. 30 | The electrocatalytic stability evaluation.** The polarization curve of CoNiS/Ni foil electrode after HER and OER stability testing, respectively.



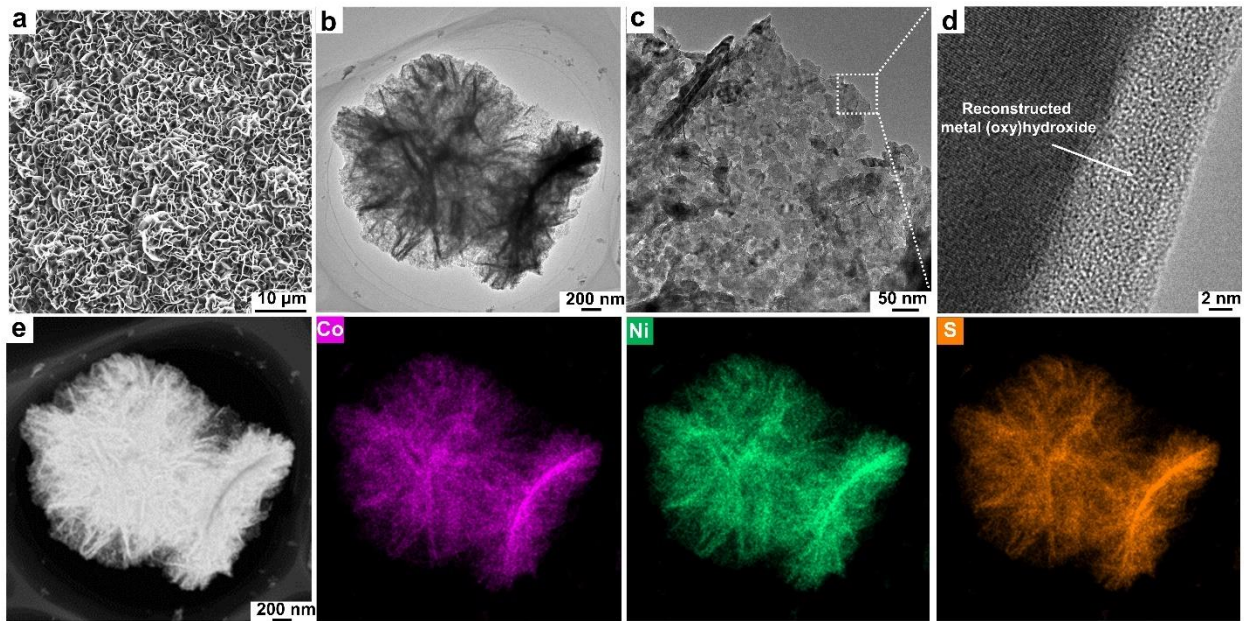

**Supplementary Fig. 31 | The morphology structure characterization of CoNiS nanosheet arrays after OER stability tests.** (a) FESEM image, TEM images with (b-c) low and (d) high magnifications. (e) energy-dispersive spectroscopy elemental mapping images of CoNiS nanosheet.

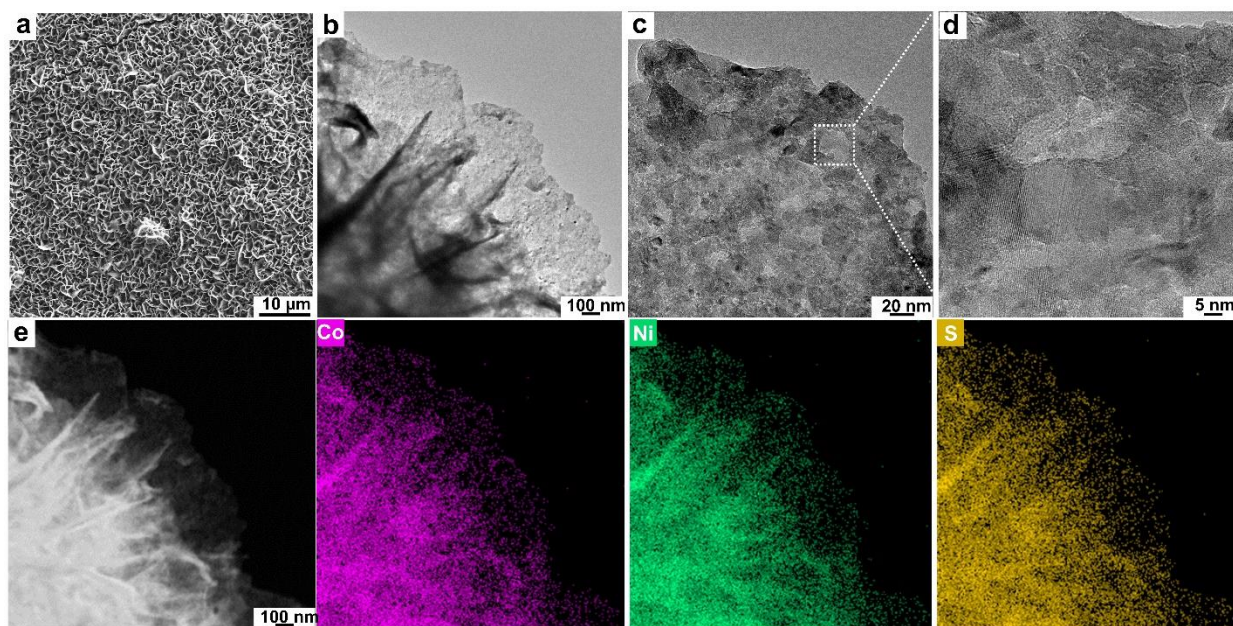

**Supplementary Fig. 32 | The morphology structure characterization of CoNiS nanosheet arrays after HER stability tests. (a) SEM image, TEM images with (b-c) low and (d) high magnifications. (e) energy-dispersive spectroscopy elemental mapping images of CoNiS nanosheet.**

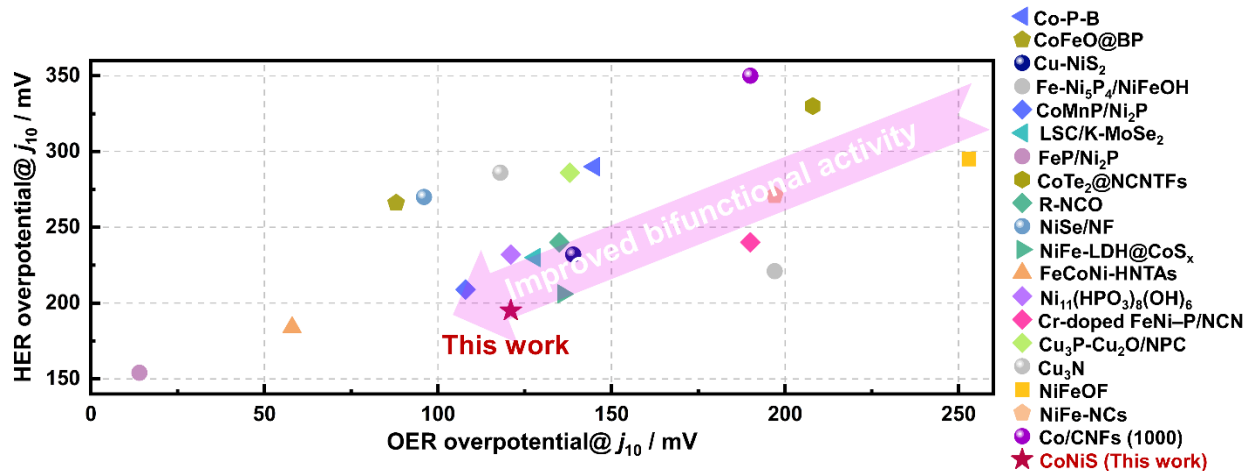

**Supplementary Fig. 33 | The bifunctional activity comparison of CoNiS and reported literatures.**

Comparison of HER and OER overpotentials at 10 mA cm<sup>-2</sup> of this work with the reported bifunctional electrocatalysts, including Ni<sub>11</sub>(HPO<sub>3</sub>)<sub>8</sub>(OH)<sub>6</sub><sup>1</sup>, Co-P-B<sup>2</sup>, CoFeO@BP<sup>3</sup>, Cr-doped FeNi-P/NCN<sup>4</sup>, Cu-NiS<sub>2</sub><sup>5</sup>, Fe-Ni<sub>5</sub>P<sub>4</sub>/NiFeOH<sup>6</sup>, Cu<sub>3</sub>P-Cu<sub>2</sub>O/NPC<sup>7</sup>, CoMnP/Ni<sub>2</sub>P<sup>8</sup>, LSC/K-MoSe<sub>2</sub><sup>9</sup>, FeP/Ni<sub>2</sub>P<sup>10</sup>, Cu<sub>3</sub>N<sup>11</sup>, CoTe<sub>2</sub>@NCNTFs<sup>12</sup>, R-NCO<sup>13</sup>, NiSe/NF<sup>14</sup>, NiFeOF<sup>15</sup>, NiFe-NCs<sup>16</sup>, NiFe-LDH@CoS<sub>x</sub><sup>17</sup>, FeCoNi-HNTAs<sup>18</sup> and Co/CNFs (1000)<sup>19</sup>.

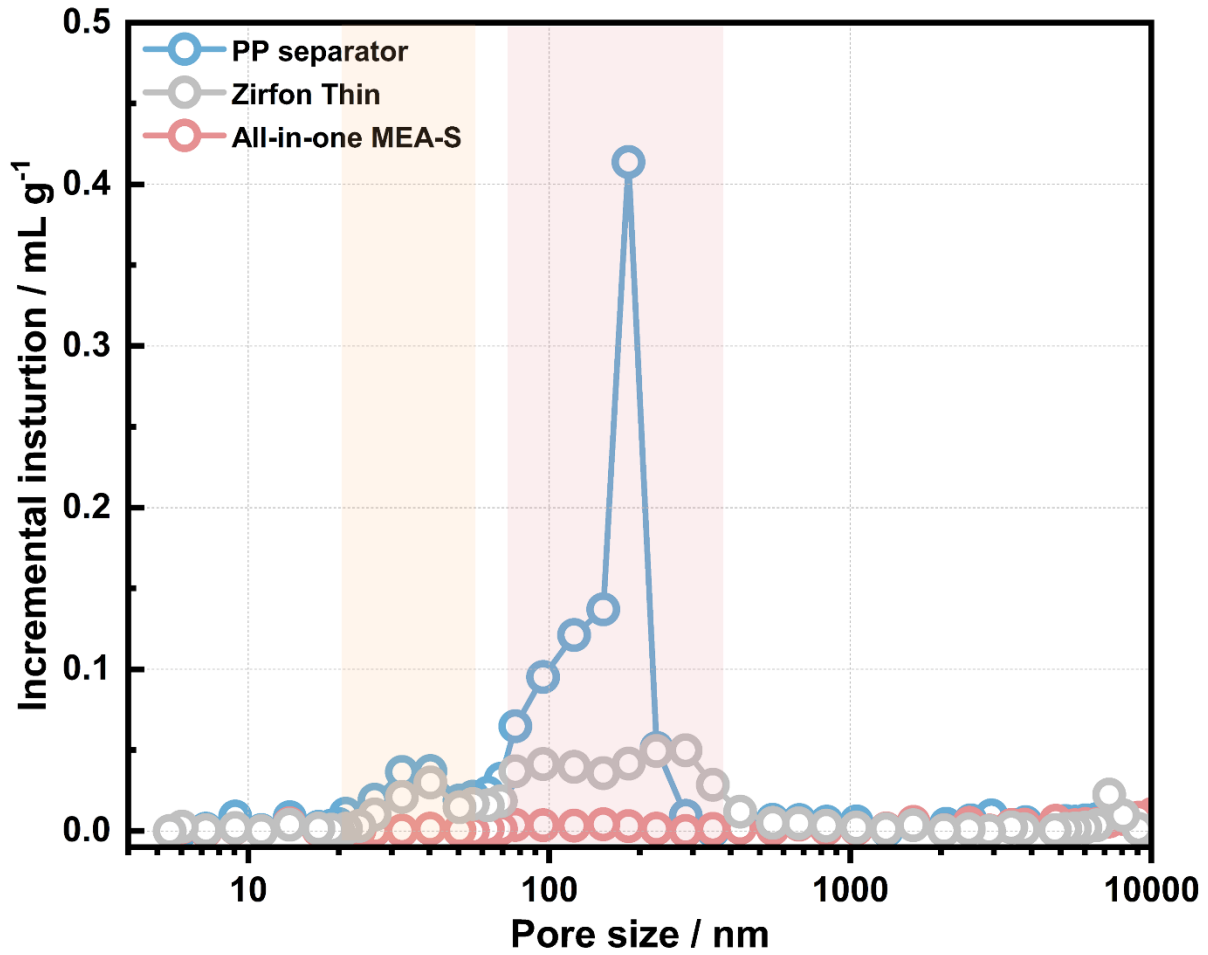

Supplementary Fig. 34 | The pore size distribution of different membranes and all-in-one MEA-S.

The curves of incremental intrusion curves for pristine PP separator, Zirfon Thin and all-in-one MEA-S as a function of pore size diameter by mercury porosimeter.

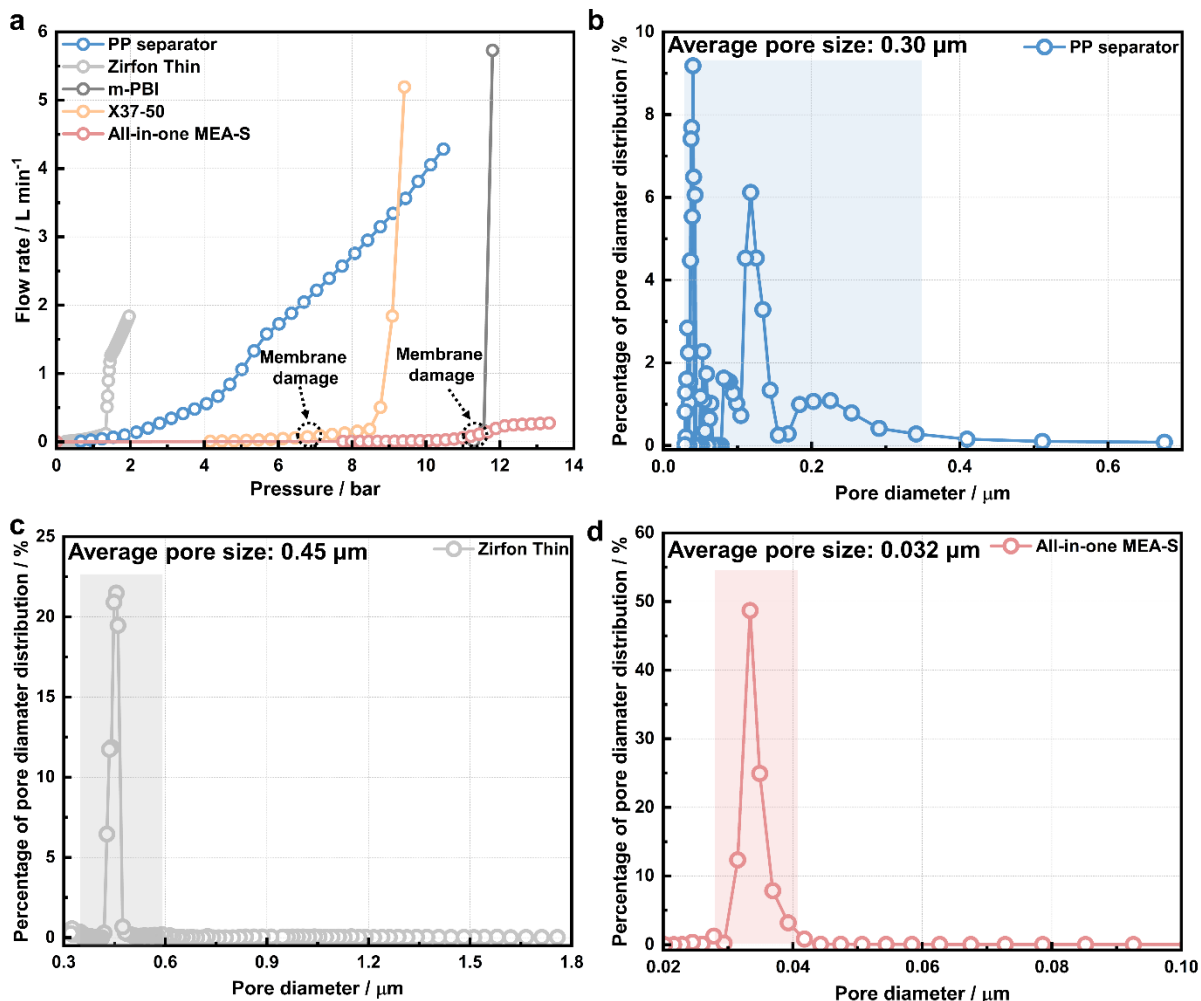

**Supplementary Fig. 35 | The bubble point and pore size distribution of different membranes and all-in-one MEA-S.** (a) Differential pressures and flow rates of PP separator, Zirfon Thin, m-PBI, Sustinion X37-50 and all-in-one MEA-S. (b) The pore diameter distribution of (b) PP separator, (c) Zirfon Thin and (d) all-in-one MEA-S, measured using a capillary flow porometer

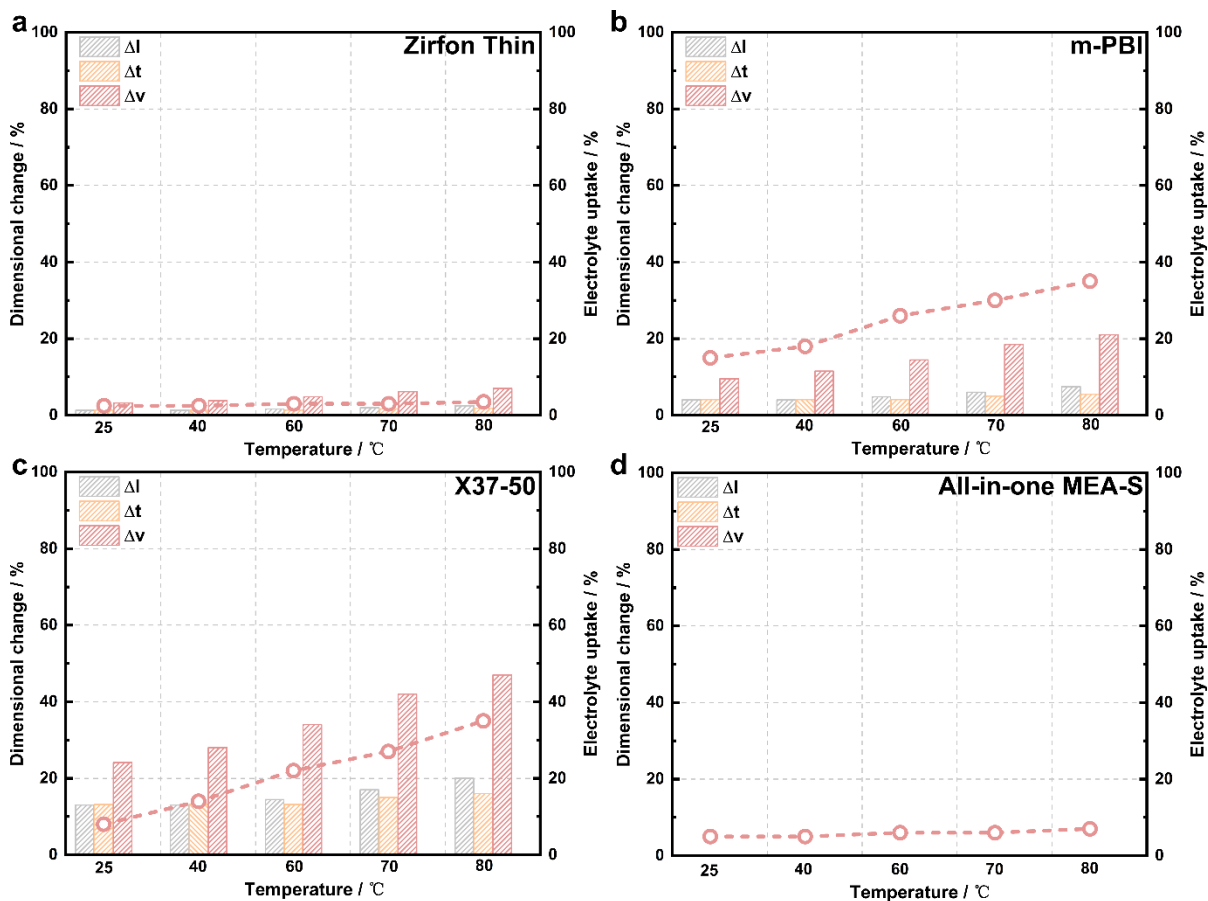

**Supplementary Fig. 36 | Swelling ratio of membranes and all-in-one MEA-S.** Electrolyte absorption behaviour of (a) Zirfon Thin, (b) m-PBI, (c) Sustainion X37-50I and (d) All-in-one MEA-S. The circle symbol depicts the water uptake of membranes. The dimensional variations of both membranes increase gradually with an increase in temperature.



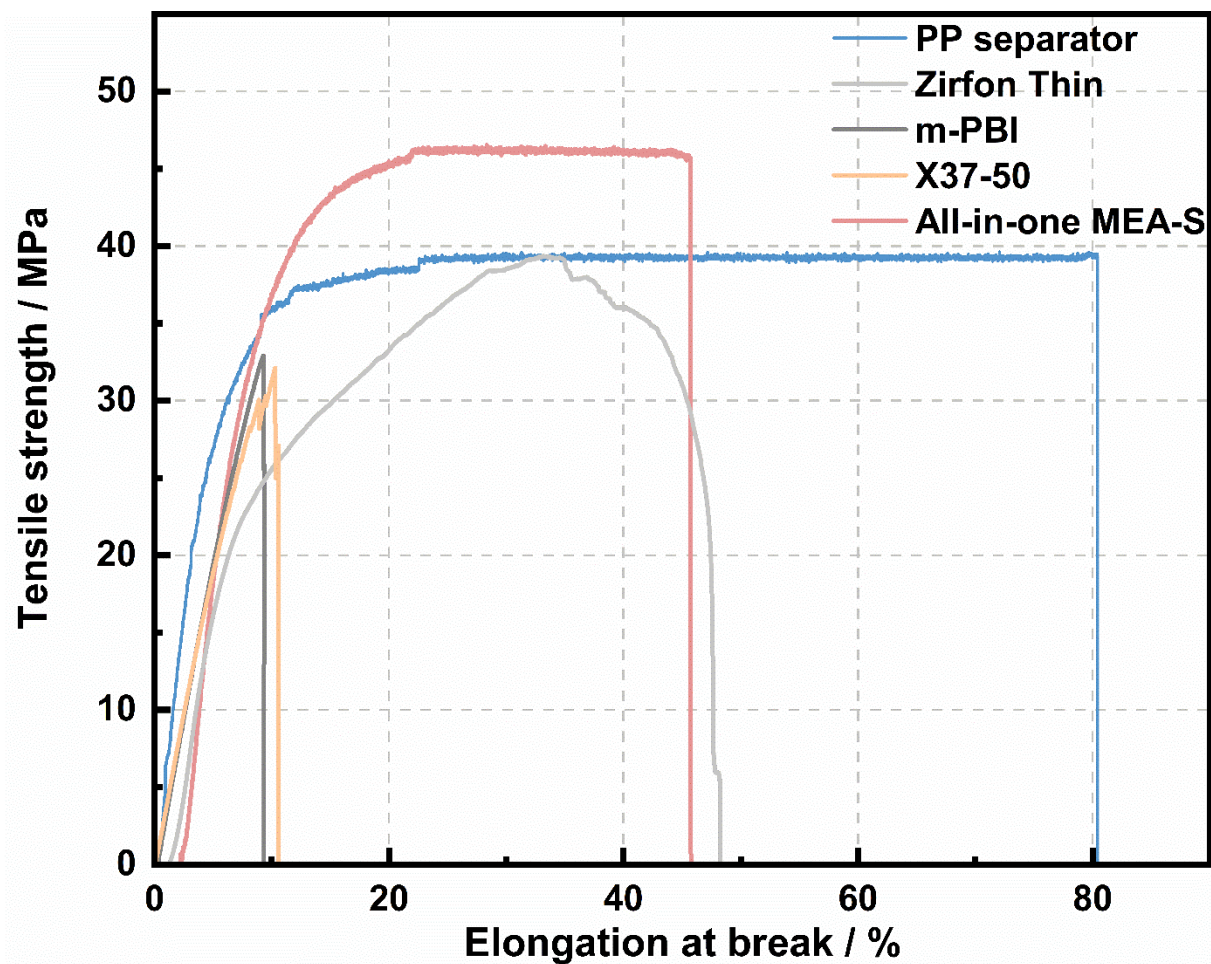

Supplementary Fig. 37 | Mechanical strength of membranes and all-in-one MEA-S. Stress-strain curves of the PP separator, commercial Zirfon Thin, m-PBI, Sustainion X37-50 membranes and all-in-one MEA-S.

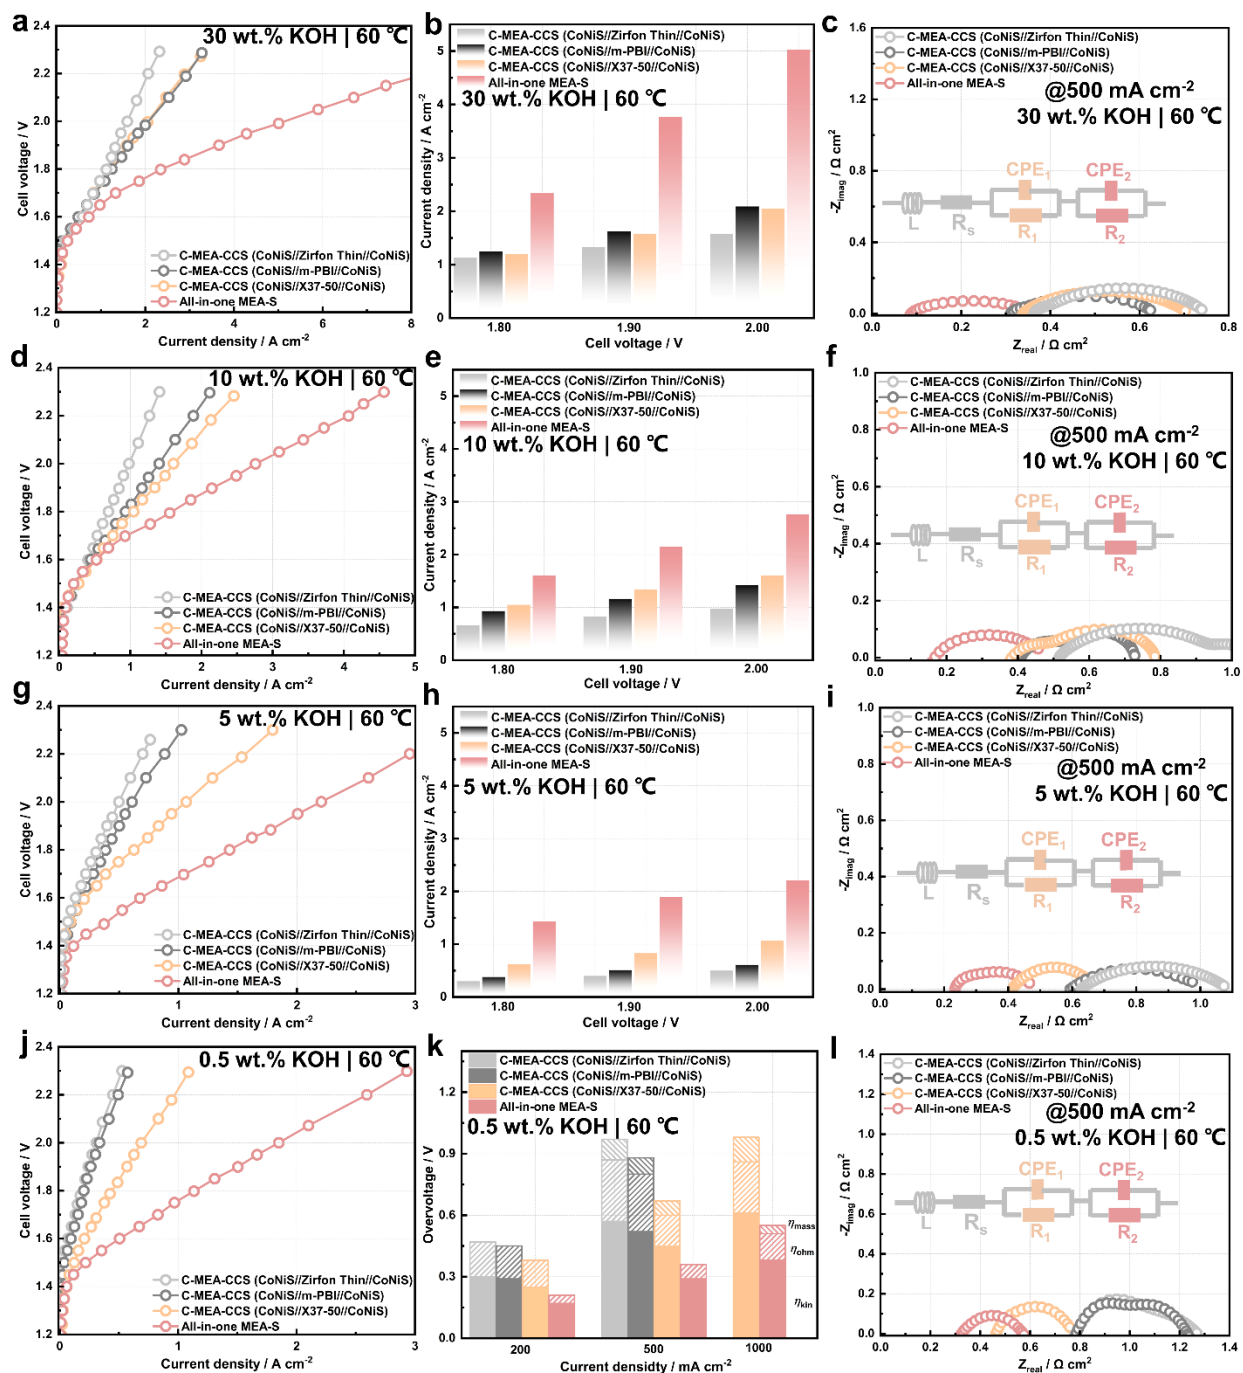

**Supplementary Fig. 38 | Performance of conventional MEA-CCS (C-MEA-CCS) and all-in-one MEA-S.** C-MEA-CCS (CoNiS//Zirfon Thin//CoNiS) uses Zirfon Thin and self-supported CoNiS as membrane and electrodes. C-MEA-CCS (CoNiS//m-PBI//CoNiS) uses m-PBI and self-supported CoNiS as membrane and electrodes. C-MEA-CCS (CoNiS//X37-50//CoNiS) uses Sustainion X37-50 and self-supported CoNiS as membrane and electrodes. Polarization curves of different MEAs in (a) 30 wt% KOH,

(d) 10 wt% KOH, (g) 5 wt% KOH and (j) 0.5 wt% KOH at 60 °C. The cell voltage of different MEAs in (b) 30 wt% KOH, (e) 10 wt% KOH and (h) 5 wt% KOH at various current density. Nyquist plot of different MEAs at 500 mA cm<sup>-2</sup> in (c) 30 wt% KOH, (f) 10 wt% KOH, (i) 5 wt% KOH and (i) 0.5 wt.% KOH at 60 °C. (k) Bar diagram of overvoltage current density (200, 500 and 1000 mA cm<sup>-2</sup>) of different MEAs divided by mass transfer ( $\eta_{\text{mass}}$ ), kinetics ( $\eta_{\text{kin}}$ ) and ohmic ( $\eta_{\text{ohm}}$ ) in 0.5 wt.% KOH at 60 °C.

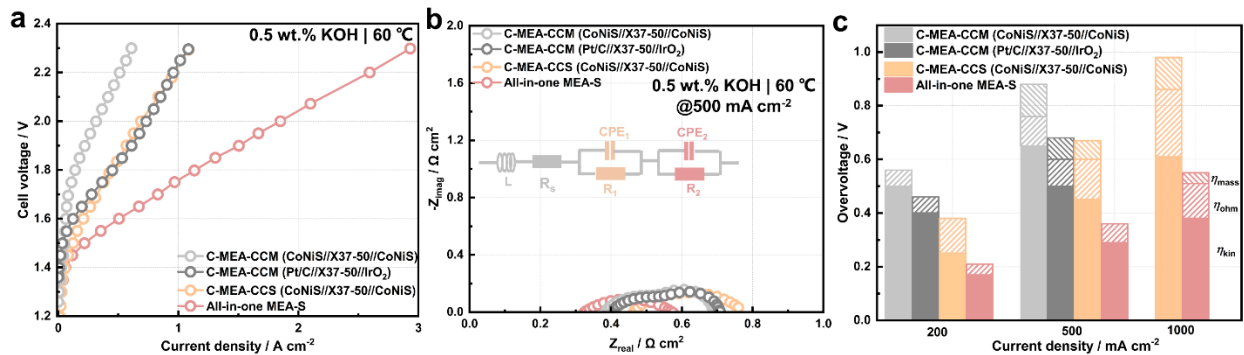

**Supplementary Fig. 39 | Performance of conventional MEAs (C-MEAs) and all-in-one MEA-S.** C-MEA-CCM (CoNiS//X37-50//CoNiS) uses Sustainion X37-50 and powdery CoNiS catalysts as membrane and CLs. C-MEA-CCM (Pt/C//X37-50//IrO<sub>2</sub>) uses Sustainion X37-50, powery Pt/C and IrO<sub>2</sub> catalysts as membrane, cathode and anode CLs, respectively. C-MEA-CCS (CoNiS//X37-50//CoNiS) uses Sustainion X37-50 and self-supported CoNiS as membrane and electrodes. (a) Polarization curves of different MEAs in 0.5 wt.% KOH at 60 °C. (b) Nyquist plot of different MEAs at 0.5 A cm<sup>-2</sup> in 0.5 wt.% KOH at 60 °C. (c) Bar diagram of overvoltage current density (200, 500 and 1000 mA cm<sup>-2</sup>) of different MEAs divided by mass transfer ( $\eta_{\text{mass}}$ ), kinetics ( $\eta_{\text{kin}}$ ) and ohmic ( $\eta_{\text{ohm}}$ ) in 0.5 wt.% KOH at 60 °C.

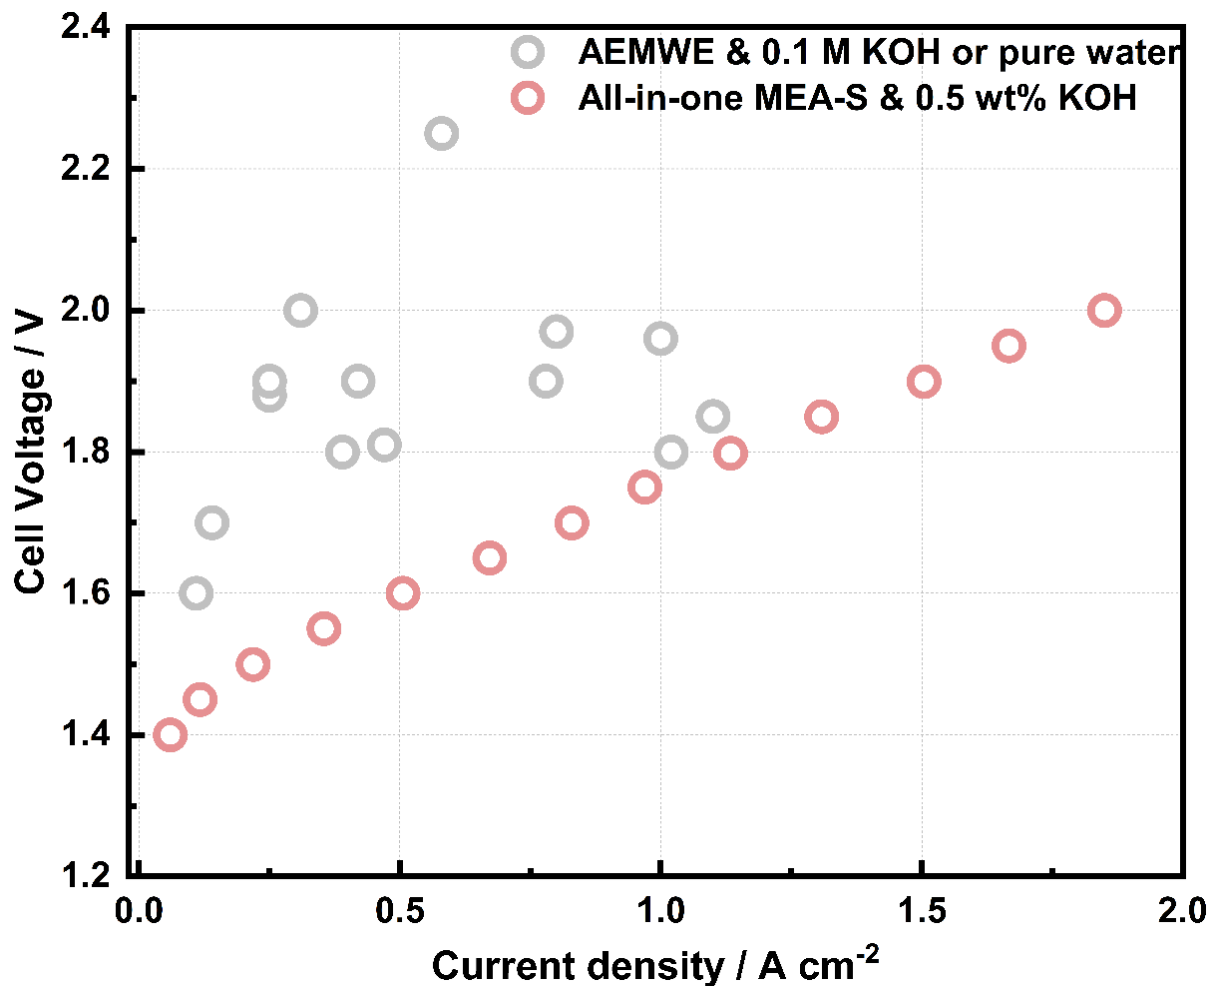

**Supplementary Fig. 40 | The electrolysis performance comparison of all-in-one MEA-S and reported literatures.** Comparison of cell performances of advanced alkaline water electrolysis (AWE) using all-in-one MEA-S in 0.5 wt% KOH in this study and the literatures (AEMWE fed with 0.1 M KOH and pure water).

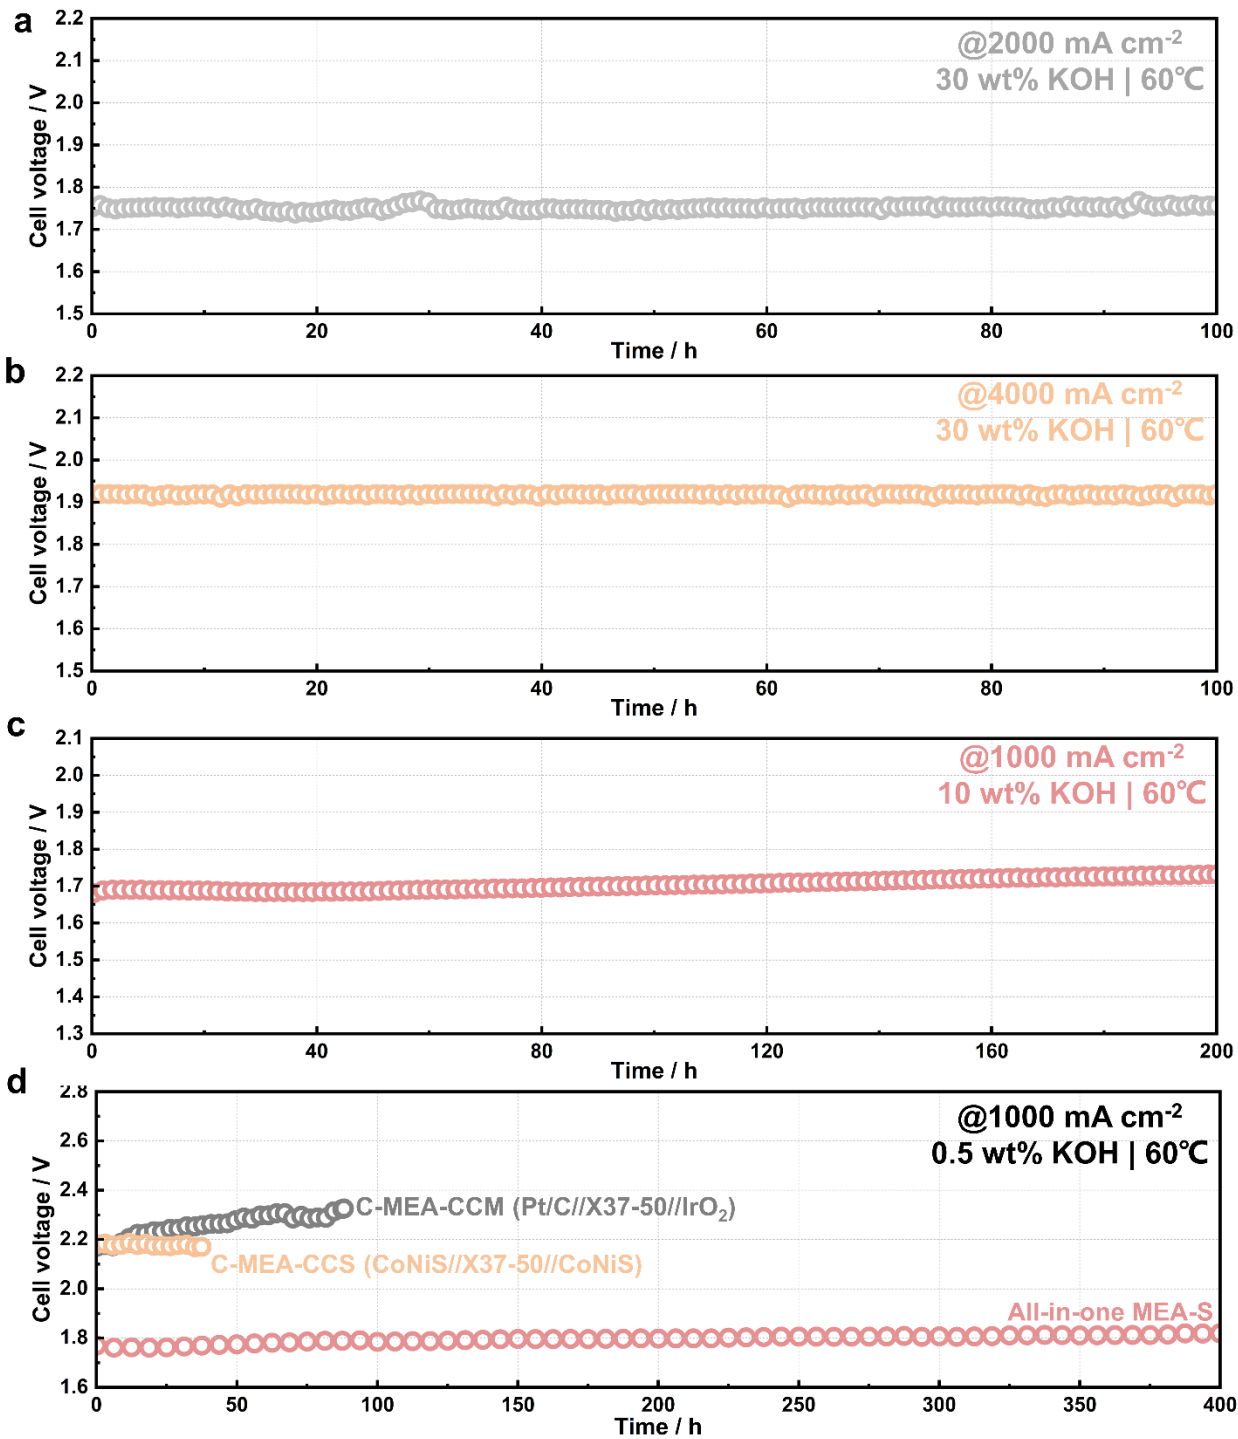

**Supplementary Fig. 41 | Durability tests of the all-in-one MEA-S at different current densities and electrolyte concentration.** (a) Long-term stability performance of all-in-one MEA-S at 2000 mA cm<sup>-2</sup> and 60 °C in 30 wt% KOH electrolyte. (b) Long-term stability performance of all-in-one MEA-S at 4000 mA cm<sup>-2</sup> and 60 °C in 30 wt% KOH electrolyte. (c) Long-term stability performance of all-in-one MEA-S at



1000 mA cm<sup>-2</sup> and 60 °C in 10 wt% KOH electrolyte. (d) Long-term stability performance of C-MEA-CCM (Pt/C//X37-50//IrO<sub>2</sub>), C-MEA-CCS (CoNiS//X37-50//CoNiS) and all-in-one MEA-S at 1000 mA cm<sup>-2</sup> and 60 °C in 0.5 wt% KOH.

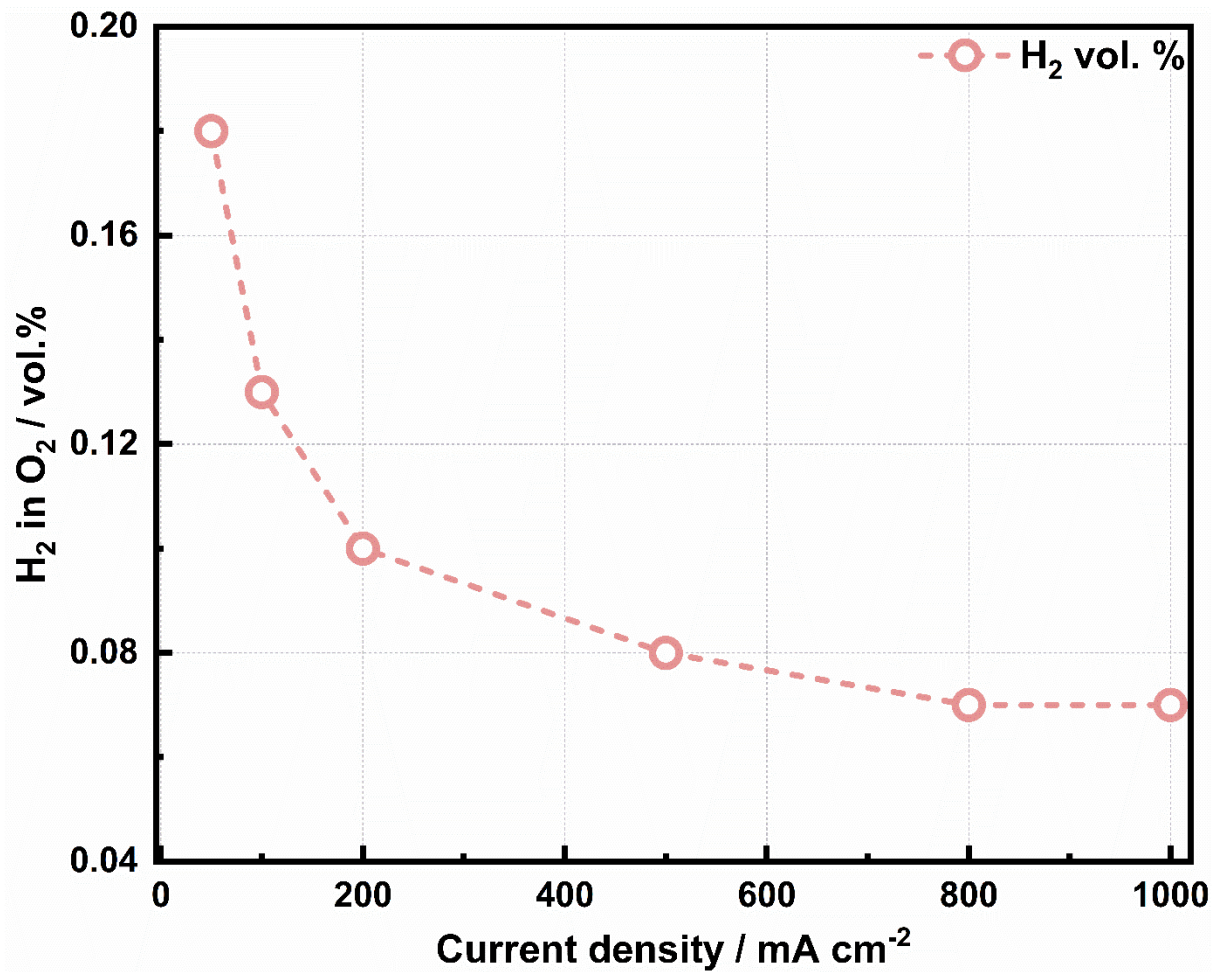

**Supplementary Fig. 42 | Hydrogen crossover.** The data points show the hydrogen crossover into the anodic oxygen stream of the all-in-one MEA-S as a function of current density, at 60 °C and atmospheric pressure in 30 wt% KOH. Each data point was collected after operating the cell for 30 min at the relevant current density.

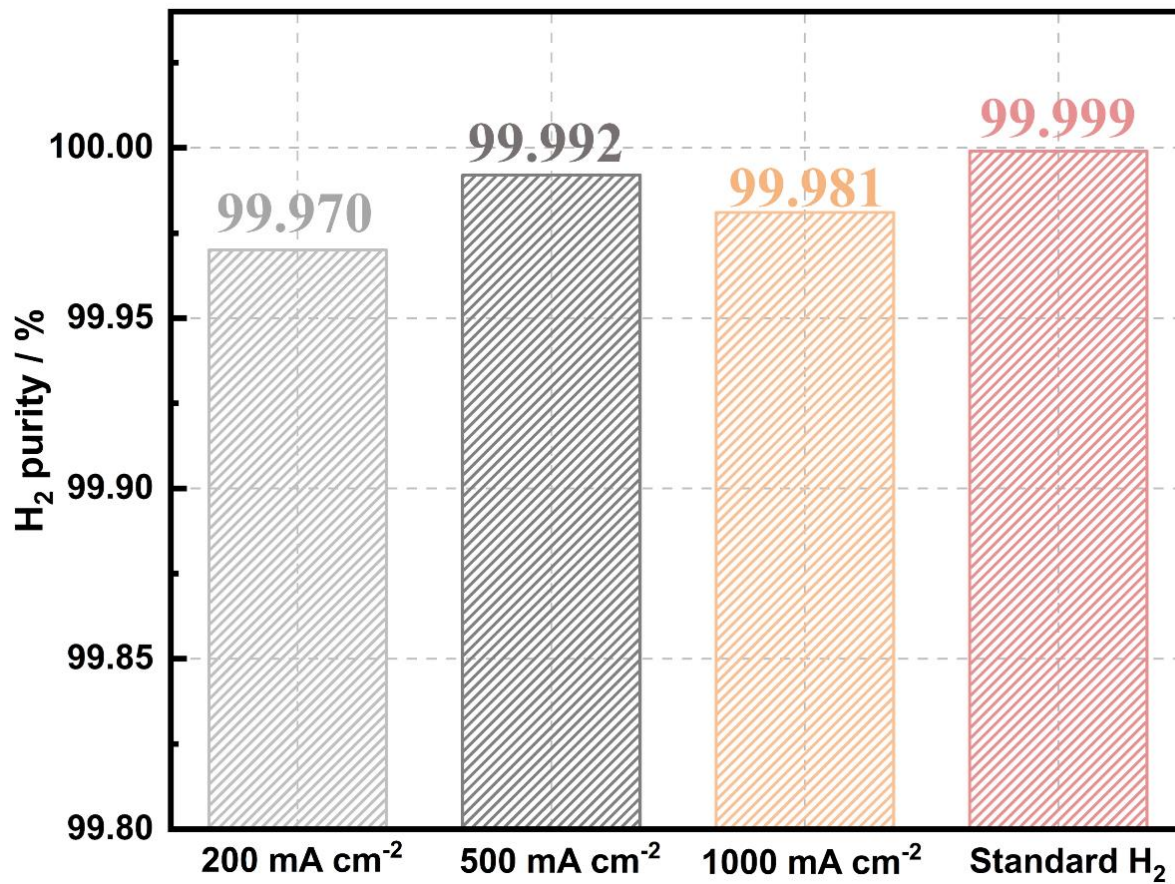

Supplementary Fig. 43 | Hydrogen gas purity generated from alkaline water electrolyzer using all-in-one MEA-S at different current densities of 200, 500 and 1000 mA cm<sup>-2</sup>. Produced H<sub>2</sub> gas was measured by gas-chromatography (GC) and compared with standard H<sub>2</sub> gas (99.999 %).

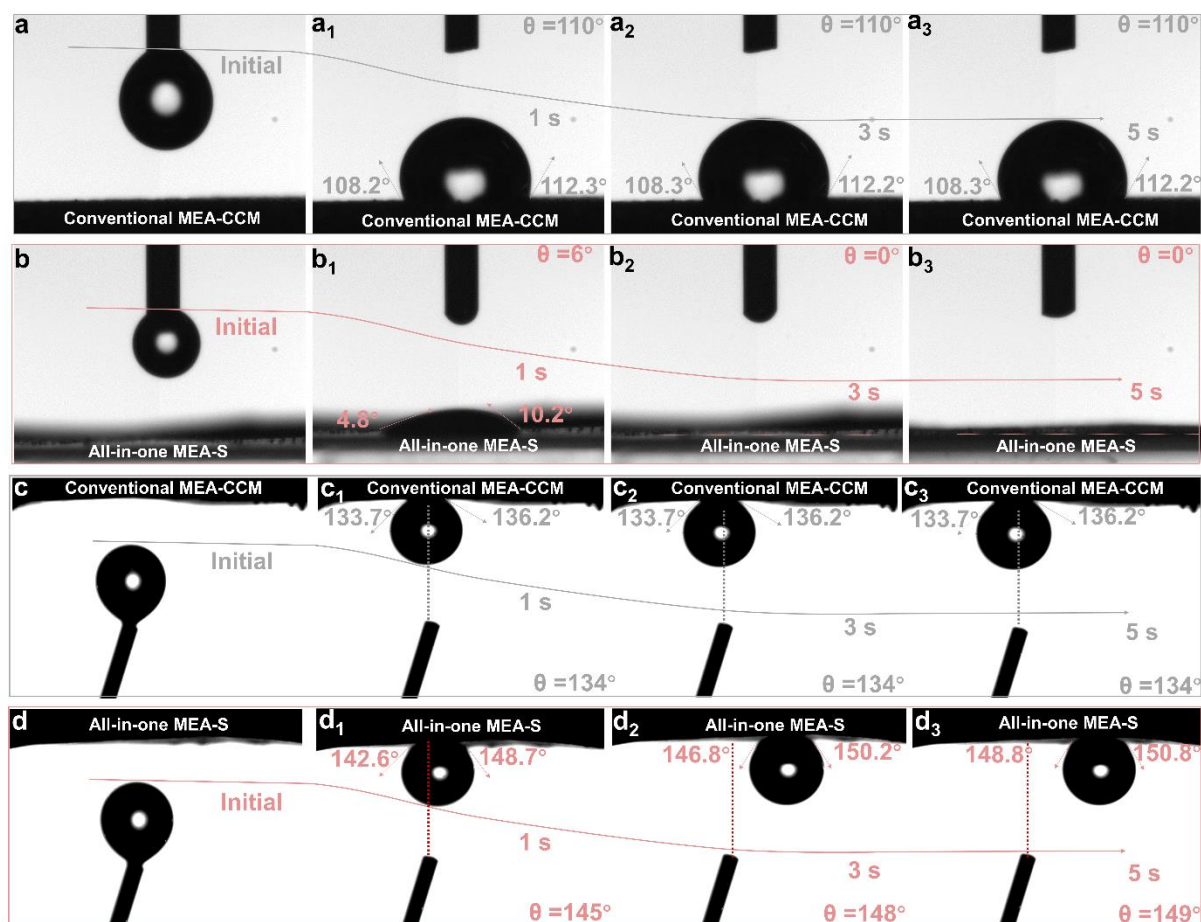

**Supplementary Fig. 44 | Superhydrophilic and aerophobic measurement.** The static droplets contact angles of (a) conventional MEA-CCM and (b) all-in-one MEA-S. The insets  $a_1$ - $a_3$  in a show the static-water-droplet measurement process where the KOH electrolyte droplets could be captured on the conventional MEA-CCM surface with passage of time. The air-bubble contact angles of (c) conventional MEA-CCM and (d) all-in-one MEA-S. The inset  $c_1$ - $c_3$  in a show the air-bubble measurement process where the air-bubble could be capture on the conventional MEA-CCM surface with the passage of time.

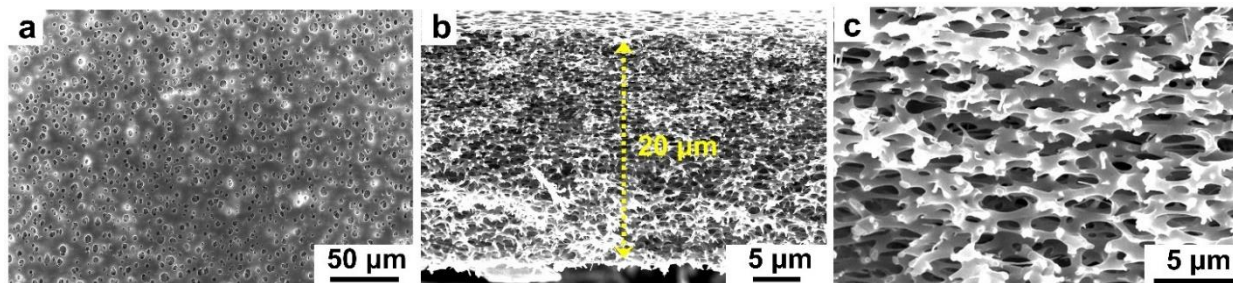

**Supplementary Fig. 45 | Morphological structure characterization of PES porous membrane by SEM.**

(a) The surface morphology of PES porous membrane. (b-c) The cross section morphology of PES porous membrane.



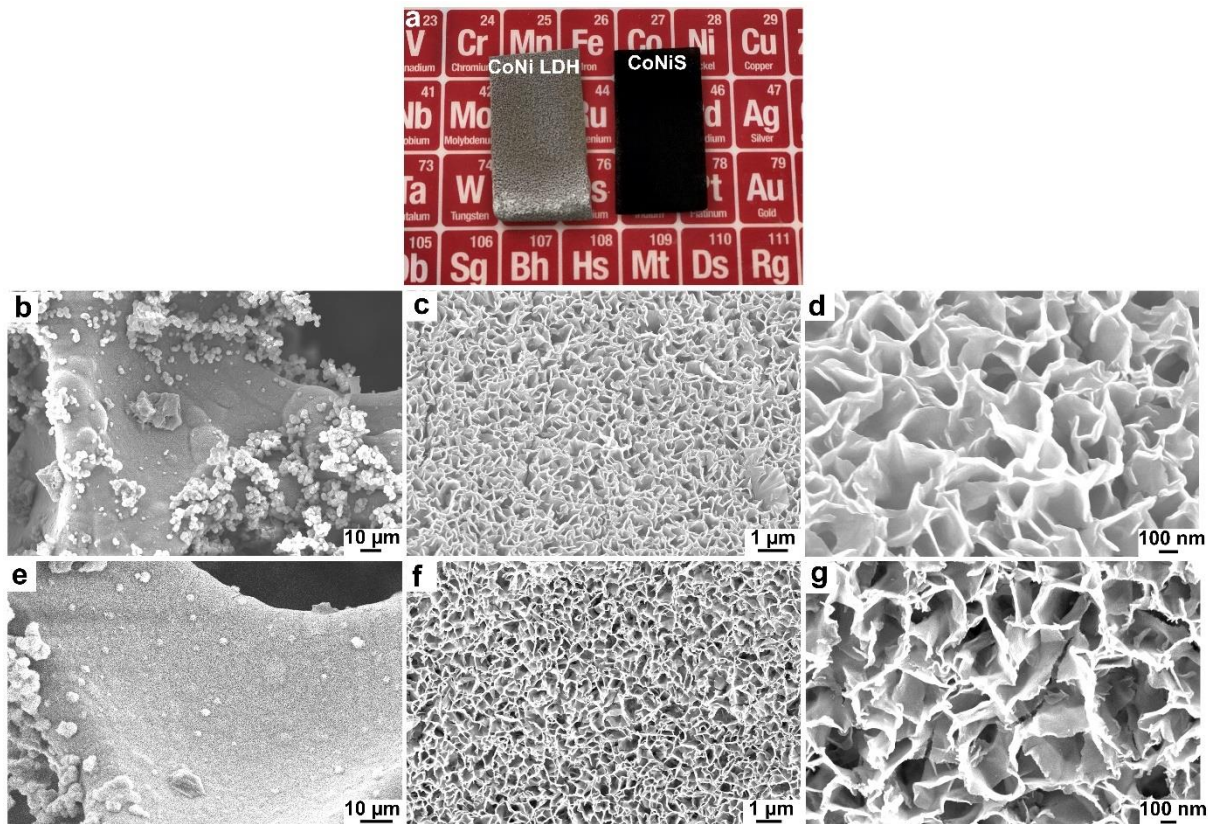

**Supplementary Fig. 46 | Morphological structure characterization of CoNi LDH/Ni foam and CoNiS/Ni foam by SEM.** (a) The optical image of CoNi LDH/Ni foam and CoNiS/Ni foam. The SEM images of CoNi LDH/Ni foam with (b-c) low and (d) high magnifications. The SEM images of CoNiS/Ni foam with (e-f) low and (g) high magnifications.



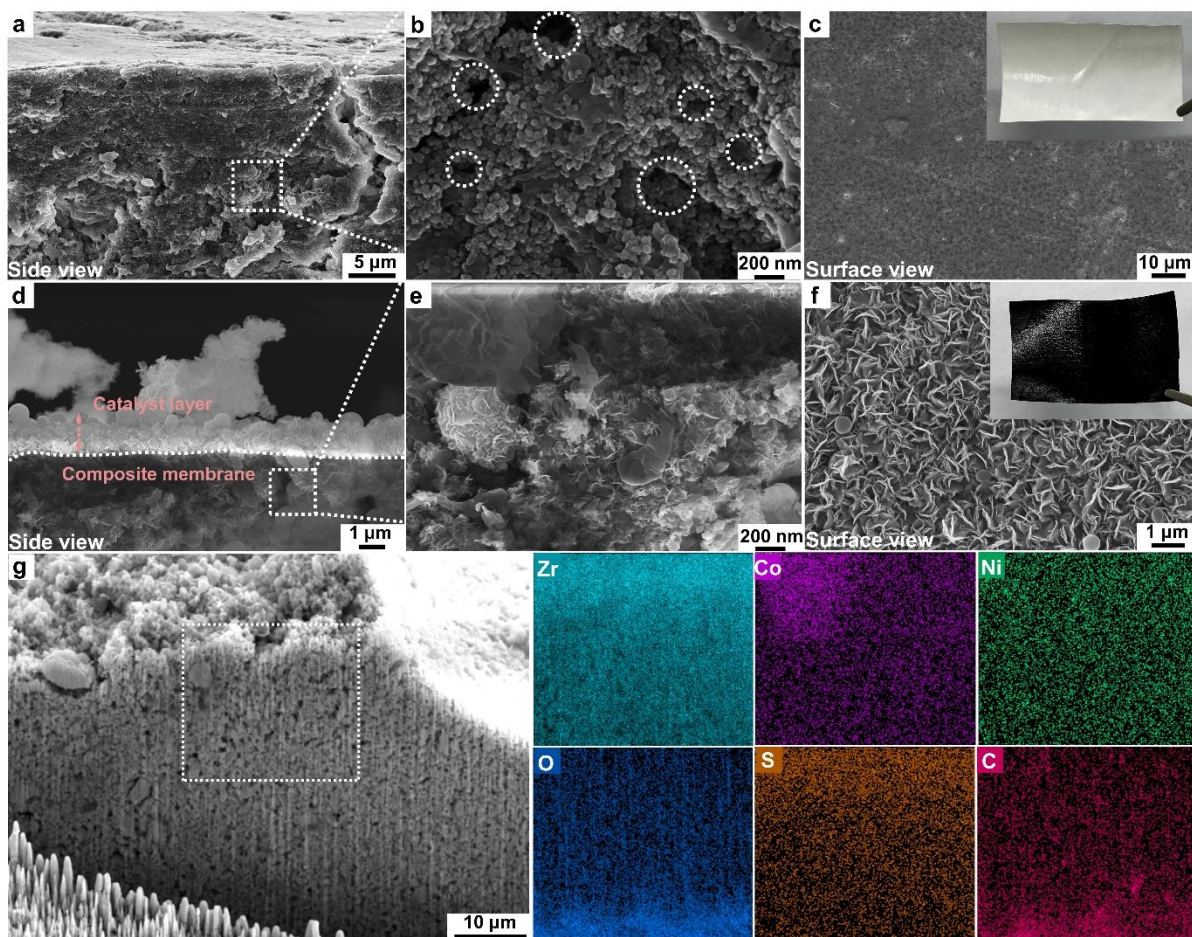

**Supplementary Fig. 47 | Morphological structure characterization of all-in-one MEA prepared using commercial Zirfon Thin membrane.** (a-b) Cross-sectional and (c) surface SEM image of porous Zirfon membrane (inset shows the optical image). (d-e) Cross-sectional and (f) surface SEM image of all-in-one MEA-S based on Zirfon membrane (inset shows the optical image). (g) Cross-sectional SEM image of all-in-one MEA-S based on Zirfon membrane prepared by focused ion beam (FIB) and corresponding EDX mapping.

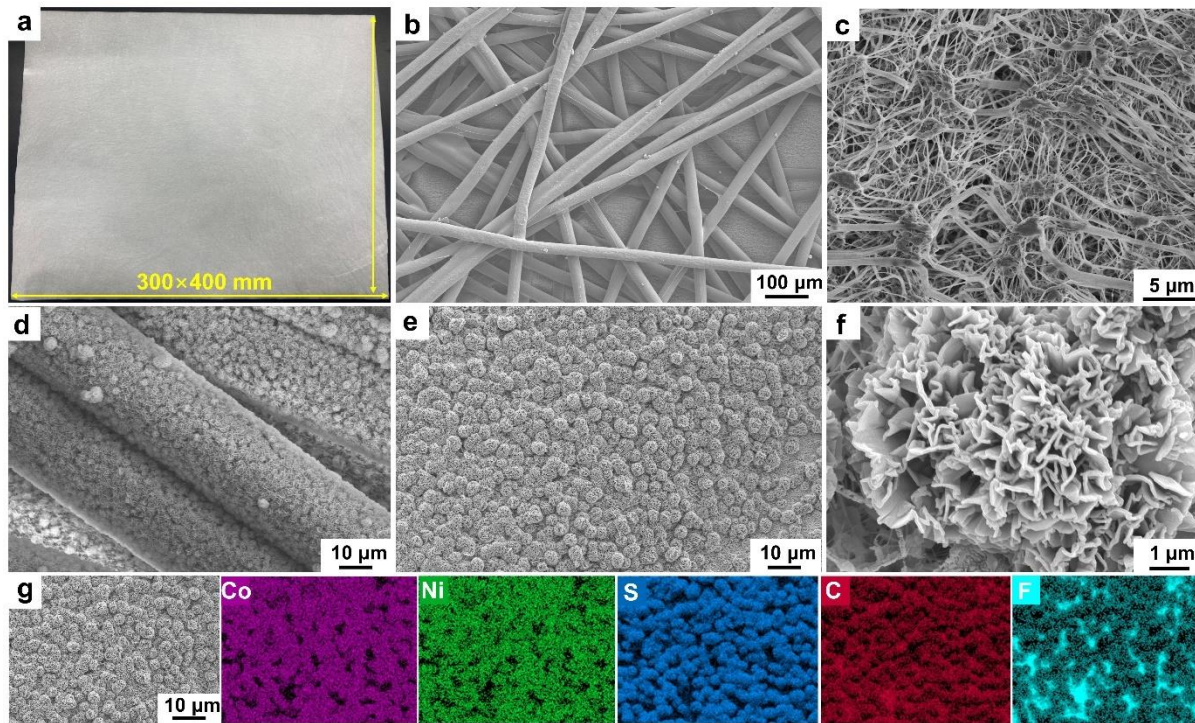

**Supplementary Fig. 48 | Morphological structure characterization of all-in-one MEA-R.** (a) The optical image of reinforced PTFE porous membranes. The surface morphologies of (b) reinforced PP side and (c) PTFE side. The catalyst layer morphologies of all-in-one MEA-R: (d) reinforced PP side and (e-f) PTFE side. (g) EDX mapping images of catalyst layer in all-in-one MEA-R



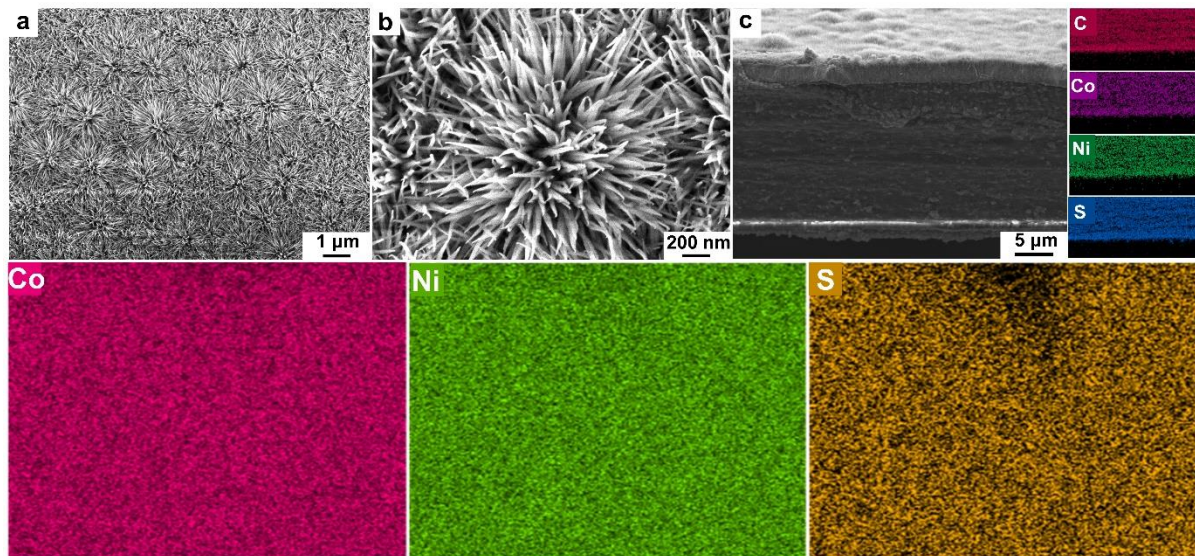

**Supplementary Fig. 49 | Morphological structure characterization of all-in-one MEA-N.** (a-b) The CL surface morphologies of all-in-one MEA (CoNiS NW). (c) The cross section morphologies of all-in-one MEA (CoNiS NW) and corresponding EDX mapping.

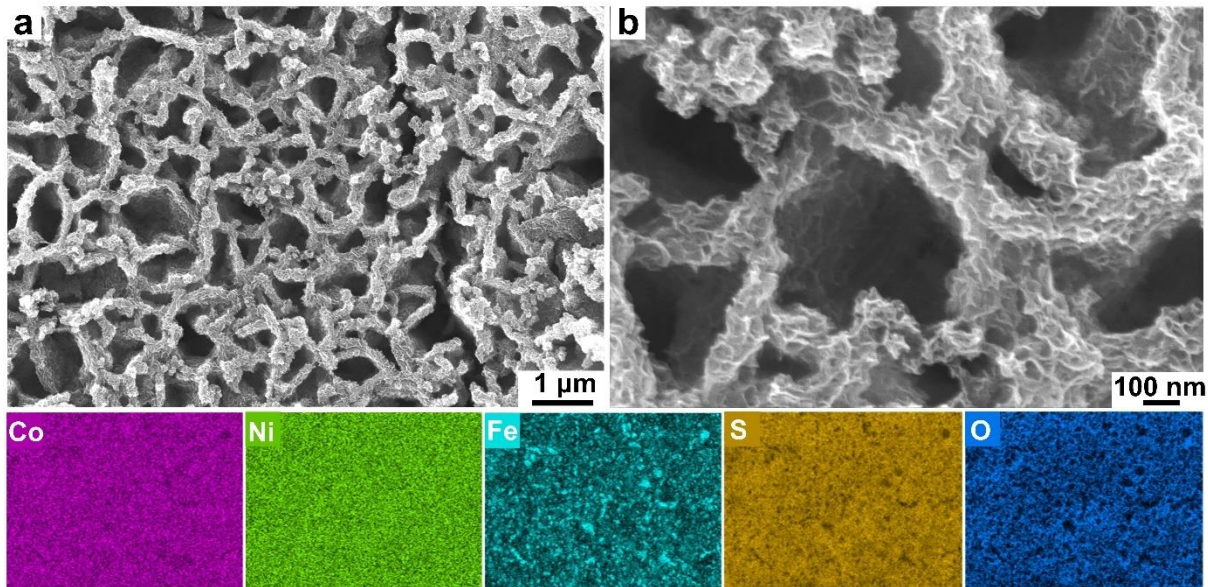

**Supplementary Fig. 50 | Morphological structure characterization of all-in-one MEA (CoNiS@FeNi LDH).** (a-b) The catalyst layer morphologies of all-in-one MEA based on CoNiS@FeNi LDH, and corresponding EDX mapping.

**Supplementary Table 1** | Summary for the porosity and pore size of different membranes and all-in-one MEA-S.

|                  | Porosity / % | BET pore size / $\mu\text{m}$ | MP pore size / $\mu\text{m}$ | CFP pore size / $\mu\text{m}$ |
|------------------|--------------|-------------------------------|------------------------------|-------------------------------|
| Porous PP        | 42           | 0.34                          | 0.36                         | 0.30                          |
| Zirfon Thin      | 52           | 0.42                          | 0.40                         | 0.45                          |
| All-in-one MEA-S | 4            | 0.04                          | 0.05                         | 0.03                          |

**Supplementary Table 2** | Advantages and disadvantages of alkaline water electrolysis using conventional MEAs and all-in-one MEA

| ALWE using MEA-CCS                                              | AEMWE using MEA-CCS                                             | AEMWE using MEA-CCM                                   | Alkaline water electrolysis using all-in-one MEA        |
|-----------------------------------------------------------------|-----------------------------------------------------------------|-------------------------------------------------------|---------------------------------------------------------|
| Commercial Zirfon Thin                                          | Sustainion X37-50                                               | Sustainion X37-50                                     | PP/CoNiS composite membrane                             |
| Self-supported electrodes                                       | Self-supported electrodes                                       | Powdery CLs                                           | 3D-ordered CLs                                          |
| High chemical stability of separator                            | Membrane degradation                                            | Membrane degradation                                  | High chemical stability of composite membrane           |
| OH <sup>-</sup> transport by pore of separator                  | OH <sup>-</sup> transport by tethered cationic groups           | OH <sup>-</sup> transport by tethered cationic groups | OH <sup>-</sup> transport by pore of composite membrane |
| High gas permeation                                             | Low gas permeation                                              | Low gas permeation                                    | Low gas permeation                                      |
| Corrosive liquid electrolyte (30 wt.% KOH)                      | Pure water or low concentrated electrolyte (1 M KOH)            | Pure water or low concentrated electrolyte (1 M KOH)  | Low concentrated electrolytes (0.5~30 wt% KOH)          |
| High interfacial resistance, especially at low concentrated KOH | High interfacial resistance, especially at low concentrated KOH | Low interfacial resistance                            | Low interfacial resistance                              |
| 3D-ordered and porous CLs                                       | 3D-ordered and porous CLs                                       | Inordered and dense CLs                               | 3D-ordered and porous CLs                               |



**Supplementary Table 3** | Comparison of cell performances of advanced alkaline water electrolysis (AWE) using all-in-one MEA-S in 5 wt% and 30 wt% KOH in this study and the literatures (ALWE, AEMWE using precious platinum group metal (PGM) free catalysts and PEMWE).

|                                | Anode                                              | Cathode                             | Membrane       | Electrolyte | Current density / A cm <sup>-2</sup> | Cell voltage / V | Ref. |
|--------------------------------|----------------------------------------------------|-------------------------------------|----------------|-------------|--------------------------------------|------------------|------|
| ALWE                           | IrO <sub>2</sub>                                   | Pt/C                                | NPBI           | 6 M KOH     | 1.50                                 | 1.92             | 20   |
|                                | NiFe LDH                                           | Raney Ni                            | Zirfon-type    | 30 wt% KOH  | 0.60                                 | 1.70             | 21   |
|                                | Ni foam                                            | Ni foam                             | PVA/ABPBI      | 15 wt% KOH  | 0.50                                 | 1.93             | 22   |
|                                | NiFe LDH                                           | Raney Ni                            | Zirfon-type    | 30 wt% KOH  | 1.40                                 | 2.10             | 23   |
|                                | NiFe LDH                                           | Raney Ni                            | cPVA/Zirfon    | 30 wt% KOH  | 1.00                                 | 2.05             | 24   |
|                                | Ni                                                 | Ni                                  | Porous PFSA    | 30 wt% KOH  | 0.20                                 | 2.12             | 25   |
|                                | Ni/MoN/rNS                                         | Ni/MoN/rNS                          | PPS            | 30 wt% KOH  | 0.40                                 | 1.85             | 26   |
| AEMWE using PGM free catalysts | Ni <sub>2</sub> P@FePO <sub>x</sub> H <sub>y</sub> | MoNi <sub>4</sub> /MoO <sub>2</sub> | AEM            | 1 M KOH     | 0.50                                 | 1.75             | 27   |
|                                | NiFe                                               | Ni                                  | FAA-3-50       | 1 M KOH     | 0.40                                 | 2.00             | 28   |
|                                | Ni felt                                            | Ni felt                             | Aemion™        | 1 M KOH     | 0.30                                 | 2.10             | 29   |
|                                | NiFeCo LDH                                         | NiFeCoP                             | X37-50 Grade T | 1 M KOH     | 0.50                                 | 1.72             | 30   |
|                                | NiFe <sub>2</sub> O <sub>4</sub>                   | NiFeCO                              | TPNPiQA        | 1 M KOH     | 0.85                                 | 2.20             | 31   |
|                                | NiFe                                               | NiFe                                | PFTP-13        | 1 M KOH     | 0.92                                 | 1.80             | 32   |
|                                | NiFe LDH                                           | NiMo                                | PVBC-Mpy/PEK   | 1 M KOH     | 0.90                                 | 2.13             | 33   |
|                                | NiCo <sub>2</sub> O <sub>4</sub>                   | NiCo <sub>2</sub> O <sub>4</sub>    | PAni           | 1 M KOH     | 0.37                                 | 2.00             | 34   |
| PEMWE                          | Ir                                                 | Pt/C                                | Nafion 115     | Pure water  | 1.95                                 | 1.95             | 35   |
|                                | IrO <sub>2</sub>                                   | Pt/C                                | Nafion 117     | Pure water  | 1.50                                 | 1.80             | 36   |
|                                | IrO <sub>2</sub>                                   | Pt/C                                | Multiblock PEM | Pure water  | 3.00                                 | 1.87             | 37   |
|                                | IrO <sub>2</sub>                                   | Pt/C                                | Nafion 117     | Pure water  | 2.00                                 | 1.80             | 38   |
|                                | IrO <sub>2</sub>                                   | CuNiMo                              | Nafion 212     | Pure water  | 1.45                                 | 1.90             | 39   |
|                                | IrO <sub>2</sub>                                   | Pt/C                                | Nafion 115     | Pure water  | 3.80                                 | 2.20             | 40   |

**Supplementary Table 4** | Comparison of cell performances of advanced alkaline water electrolysis (AWE) using all-in-one MEA-S in 0.5 wt% KOH in this study and the literatures (AEMWE fed with 0.1 M KOH and pure water).

|       | Anode                                | Cathode                                            | Membrane       | Electrolyte                          | Current density / $\text{A cm}^{-2}$ | Cell voltage / V | Ref. |
|-------|--------------------------------------|----------------------------------------------------|----------------|--------------------------------------|--------------------------------------|------------------|------|
|       | a-NiFeOOH                            | MoNi <sub>4</sub> /MoO <sub>2</sub>                | FAA-3-50       | Pure water                           | 0.25                                 | 1.88             | 41   |
|       | NiFe                                 | Ni                                                 | FAA-3-50       | 0.1 M KOH                            | 0.31                                 | 2.00             | 28   |
|       | Ni-LCO/C                             | Cu <sub>0.5</sub> Co <sub>2.5</sub> O <sub>4</sub> | X37-50 Grade T | 0.1 M KOH                            | 0.78                                 | 1.90             | 42   |
|       | NiFe LDH                             | Pt/C                                               | HWU-AEM        | Pure water                           | 0.25                                 | 1.90             | 43   |
|       | NiCoFeO <sub>x</sub>                 | Pt black                                           | AEM            | Pure water                           | 0.58                                 | 2.25             | 44   |
|       | NiFe-BTC-GNPs                        | MoNi <sub>4</sub> /MoO <sub>2</sub>                | FAA-3-PK-130   | 0.1 M KOH                            | 1.10                                 | 1.85             | 45   |
| AEMWE | NiCoFe-NDA                           | Pt/C                                               | X37-50 Grade T | 0.1 M KOH                            | 0.42                                 | 1.90             | 46   |
|       | IrO <sub>2</sub>                     | Pt/C                                               | PiperION       | Pure water                           | 0.80                                 | 1.97             | 47   |
|       | IrO <sub>2</sub>                     | Pt/C                                               | QPC-TMA        | Pure water                           | 0.14                                 | 1.70             | 48   |
|       | FeNiOOH-F                            | Pt/C                                               | PAP-TP-85      | Pure water                           | 1.02                                 | 1.80             | 49   |
|       | Ir-Ni/Mo <sub>5</sub> N <sub>6</sub> | Ir-Ni/Mo <sub>5</sub> N <sub>6</sub>               | X37-50 Grade T | Pure water                           | 0.11                                 | 1.6              | 50   |
|       | Acta 3030                            | Acta 4030                                          | A201           | 1 wt% K <sub>2</sub> CO <sub>3</sub> | 0.47                                 | 1.81             | 51   |
|       | IrO <sub>2</sub>                     | Pt black                                           | A201           | Pure water                           | 0.39                                 | 1.80             | 52   |
|       | IrO <sub>2</sub>                     | Pt/C                                               | PFOTFPh        | Pure water                           | 1.00                                 | 1.96             | 53   |

**Supplementary Table 5** | Comparison of operating parameters of stacks of 200 of the individual cells at 60 °C

| Cell stack type                                        | Fixed current density / A cm <sup>-2</sup> | Number of cells | Current / A | Cell stack voltage / V | Total power / kW | Electrolyte / KOH wt% |
|--------------------------------------------------------|--------------------------------------------|-----------------|-------------|------------------------|------------------|-----------------------|
| Conventional MEA-CCM (Pt/C//X37-50//IrO <sub>2</sub> ) | 1.0                                        | 200             | 200         | 392                    | 78.4             | 5                     |
| Conventional MEA-CCS (CoNiS//Zirfon Thin//CoNiS)       | 1.0                                        | 200             | 200         | 356                    | 71.2             | 30                    |
| All-in-one MEA-S                                       | 1.0                                        | 200             | 200         | 330                    | 66.0             | 5                     |
| All-in-one MEA (CoNiS@FeNi LDH)                        | 1.0                                        | 200             | 200         | 314                    | 62.8             | 30                    |

**Supplementary Table 6** | Comparison of reported hydrogen crossover with conventional separators.

| Separator           | Electrolyte | Temperature / °C | Pressure / bar | Current density / A cm <sup>-2</sup> | Concentration (H <sub>2</sub> in O <sub>2</sub> ) / vol.% | Reference |
|---------------------|-------------|------------------|----------------|--------------------------------------|-----------------------------------------------------------|-----------|
| All-in-one MEA-S    | 30 wt% KOH  | 60               | 1 atm          | 0.05                                 | 0.18                                                      | This work |
| All-in-one MEA-S    | 30 wt% KOH  | 60               | 1 atm          | 0.20                                 | 0.10                                                      | This work |
| Zirfon PERL UTP 500 | 30 wt% KOH  | 80               | 10             | 0.40                                 | 0.21                                                      | 54        |
| PTFE/LDH            | 1 M KOH     | 80               | 1 atm          | 0.50                                 | 1.30                                                      | 55        |
| Zirfon              | 30 wt% KOH  | 80               | 1 atm          | 0.10                                 | 2.42                                                      | 24        |
| cPVAZ-30            | 30 wt% KOH  | 80               | 1 atm          | 0.10                                 | 0.32                                                      | 24        |
| cPVAZ-30            | 30 wt% KOH  | 80               | 1 atm          | 0.20                                 | 0.27                                                      | 24        |
| Zirfon              | 30 wt% KOH  | 80               | 0.3            | 0.20                                 | 1.59                                                      | 21        |
| Z80_300um           | 30 wt% KOH  | 80               | 0.3            | 0.05                                 | 1.24                                                      | 21        |
| Z80_300um           | 30 wt% KOH  | 80               | 0.3            | 0.20                                 | 0.26                                                      | 21        |
| Z80C5               | 10 wt% KOH  | 80               | 0.1            | 0.05                                 | 0.26                                                      | 56        |
| Z80C5               | 10 wt% KOH  | 80               | 0.1            | 0.20                                 | 0.21                                                      | 56        |
| Z80C5               | 10 wt% KOH  | 80               | 0.3            | 0.05                                 | 0.75                                                      | 56        |
| Nafion 117          | DI water    | 80               | 1 atm          | 0.40                                 | 1.91                                                      | 57        |
| Nafion 212          | DI water    | 80               | 1 atm          | 1.40                                 | 1.91                                                      | 57        |

**Supplementary Table 7** | The comparison of energy efficiency at the current density of 1000 mA cm<sup>-2</sup> for all-in-one MEAs and recently reported alkaline water electrolyzers

| Anode                            | Cathode                        | membrane                    | Voltage@1000<br>mA cm <sup>-2</sup> | Energy<br>efficiency<br>/ % | Reference        |
|----------------------------------|--------------------------------|-----------------------------|-------------------------------------|-----------------------------|------------------|
| NiFe                             | Ni                             | FAA-3-50                    | 2.3                                 | 63.91                       | 28               |
| FeNiPS                           | FeNiPS                         | FAA-3-50                    | 1.75                                | 84.00                       | 58               |
| NiFeO                            | Pt/C                           | X37-50 Grade T              | 1.76                                | 83.52                       | 9                |
| NiAlMo                           | NiAlMo                         | HMT-PBI                     | 1.82                                | 80.77                       | 59               |
| IrO <sub>2</sub>                 | Pt/C                           | PFOTPh-TMA                  | 1.78                                | 82.58                       | 53               |
| NiMoO <sub>2</sub>               | NiCoFe                         | Fumapem-3-PE-30             | 1.96                                | 75.00                       | 60               |
| IrO <sub>2</sub>                 | Pt/C                           | PiperION                    | 1.68                                | 87.50                       | 47               |
| IrO <sub>2</sub>                 | PtRu/C                         | HTMA-DAPP                   | 1.66                                | 88.55                       | 61               |
| NiFe LDH                         | Pt/C                           | X37-50                      | 1.7                                 | 86.47                       | 62               |
| Co                               | PtNi                           | AEM                         | 1.9                                 | 77.37                       | 63               |
| NiCoFeO                          | Pt                             | AEM                         | 2.5                                 | 58.80                       | 44               |
| NiFe LDH                         | Pt/C                           | X37-50 Grade T              | 1.58                                | 93.04                       | 64               |
| NiFeOOH                          | Pt/C                           | FAA-3-50                    | 1.62                                | 90.74                       | 65               |
| CoSb <sub>2</sub> O <sub>6</sub> | Pt/C                           | FAA-3-50                    | 2                                   | 73.50                       | 66               |
| CuCo <sub>2</sub> O <sub>4</sub> | Pt/C                           | X37-50 Grade T              | 1.83                                | 80.32                       | 67               |
| Fe-NiMo                          | NiMo                           | X37-50 Grade T              | 1.57                                | 93.63                       | 68               |
| FeNi LDH                         | CoP                            | PTFE/LDH                    | 1.8                                 | 81.67                       | 55               |
| IrO <sub>2</sub>                 | Ru <sub>2</sub> P              | X37-50                      | 1.87                                | 78.61                       | 69               |
| FeNi LDH                         | Raney Ni                       | Cellulose-blended<br>Zirfon | 1.72                                | 85.47                       | 23               |
| CoFe                             | Pt/C                           | FAA-3-50                    | 1.73                                | 84.97                       | 70               |
| IrO <sub>2</sub>                 | Pt/C                           | FAA-3-50                    | 1.78                                | 82.58                       | 71               |
| CuCoO                            | Co <sub>3</sub> S <sub>4</sub> | X37-50                      | 2.2                                 | 66.82                       | 72               |
| IrO <sub>2</sub>                 | CuCoP                          | X37-50                      | 2.03                                | 72.41                       | 73               |
| FeNi LDH                         | Pt/C                           | HWU-AEM                     | 1.92                                | 76.56                       | 43               |
| Ni                               | Ni                             | PVBC-Mpy/PEK-<br>cardo      | 2.2                                 | 66.82                       | 33               |
| <b>CoNiS@FeNi<br/>LDH</b>        | <b>CoNiS@FeNi<br/>LDH</b>      | <b>All-in-one MEA</b>       | <b>1.57</b>                         | <b>94.00%</b>               | <b>This work</b> |

## Supplementary References

1. Menezes PW, *et al.* A structurally versatile nickel phosphite acting as a robust bifunctional electrocatalyst for overall water splitting. *Energy & Environmental Science* **11**, 1287-1298 (2018).
2. Chunduri A, *et al.* A unique amorphous cobalt-phosphide-boride bifunctional electrocatalyst for enhanced alkaline water-splitting. *Applied Catalysis B: Environmental* **259**, 118051 (2019).
3. Li X, *et al.* Adaptive Bifunctional Electrocatalyst of Amorphous CoFe Oxide @ 2D Black Phosphorus for Overall Water Splitting. *Angew Chem Int Ed Engl* **59**, 21106-21113 (2020).
4. Wu Y, *et al.* Cr-Doped FeNi-P Nanoparticles Encapsulated into N-Doped Carbon Nanotube as a Robust Bifunctional Catalyst for Efficient Overall Water Splitting. *Adv Mater* **31**, e1900178 (2019).
5. Dinh KN, *et al.* Electronic Modulation of Nickel Disulfide toward Efficient Water Electrolysis. *Small* **16**, e1905885 (2020).
6. Li C-F, Zhao J-W, Xie L-J, Wu J-Q, Li G-R. Fe doping and oxygen vacancy modulated Fe-Ni<sub>5</sub>P<sub>4</sub>/NiFeOH nanosheets as bifunctional electrocatalysts for efficient overall water splitting. *Applied Catalysis B: Environmental* **291**, 119987 (2021).
7. Zhu J, *et al.* Gram-Scale production of Cu<sub>3</sub>P-Cu<sub>2</sub>O Janus nanoparticles into nitrogen and phosphorous doped porous carbon framework as bifunctional electrocatalysts for overall water splitting. *Chemical Engineering Journal* **427**, 130946 (2022).
8. Liu M, *et al.* Hierarchical superhydrophilic/superaerophobic CoMnP/Ni<sub>2</sub>P nanosheet-based microplate arrays for enhanced overall water splitting. *Journal of Materials Chemistry A* **9**, 22129-22139 (2021).
9. Lee J, *et al.* Corrosion-engineered bimetallic oxide electrode as anode for high-efficiency anion exchange membrane water electrolyzer. *Chemical Engineering Journal* **420**, (2021).
10. Yu F, *et al.* High-performance bifunctional porous non-noble metal phosphide catalyst for overall water splitting. *Nat Commun* **9**, 2551 (2018).
11. Panda C, Menezes PW, Zheng M, Orthmann S, Driess M. In Situ Formation of Nanostructured Core-Shell Cu<sub>3</sub>N-CuO to Promote Alkaline Water Electrolysis. *ACS Energy Letters* **4**, 747-754 (2019).
12. Wang X, *et al.* Metal-organic framework derived CoTe<sub>2</sub> encapsulated in nitrogen-doped carbon nanotube frameworks: a high-efficiency bifunctional electrocatalyst for overall water splitting. *Journal of Materials Chemistry A* **6**, 3684-3691 (2018).



13. Peng S, *et al.* Necklace-like Multishelled Hollow Spinel Oxides with Oxygen Vacancies for Efficient Water Electrolysis. *J Am Chem Soc* **140**, 13644-13653 (2018).
14. Tang C, Cheng N, Pu Z, Xing W, Sun X. NiSe Nanowire Film Supported on Nickel Foam: An Efficient and Stable 3D Bifunctional Electrode for Full Water Splitting. *Angew Chem Int Ed Engl* **54**, 9351-9355 (2015).
15. Liang K, *et al.* Overall Water Splitting with Room-Temperature Synthesized NiFe Oxyfluoride Nanoporous Films. *ACS Catalysis* **7**, 8406-8412 (2017).
16. Kumar A, Bhattacharyya S. Porous NiFe-Oxide Nanocubes as Bifunctional Electrocatalysts for Efficient Water-Splitting. *ACS Appl Mater Interfaces* **9**, 41906-41915 (2017).
17. Yang Y, *et al.* Self-supported NiFe-LDH@CoSx nanosheet arrays grown on nickel foam as efficient bifunctional electrocatalysts for overall water splitting. *Chemical Engineering Journal* **419**, 129512 (2021).
18. Li H, *et al.* Systematic design of superaerophobic nanotube-array electrode comprised of transition-metal sulfides for overall water splitting. *Nat Commun* **9**, 2452 (2018).
19. Yang Z, *et al.* Trifunctional Self-Supporting Cobalt-Embedded Carbon Nanotube Films for ORR, OER, and HER Triggered by Solid Diffusion from Bulk Metal. *Adv Mater* **31**, e1808043 (2019).
20. Hu B, *et al.* A stable ion-solvating PBI electrolyte enabled by sterically bulky naphthalene for alkaline water electrolysis. *Journal of Membrane Science* **643**, (2022).
21. Lee HI, *et al.* Advanced Zirfon-type porous separator for a high-rate alkaline electrolyser operating in a dynamic mode. *Journal of Membrane Science* **616**, (2020).
22. Diaz LA, Coppola RE, Abuin GC, Escudero-Cid R, Herranz D, Ocón P. Alkali-doped polyvinyl alcohol – Polybenzimidazole membranes for alkaline water electrolysis. *Journal of Membrane Science* **535**, 45-55 (2017).
23. Hu C, *et al.* Robust and durable poly(aryl-co-aryl piperidinium) reinforced membranes for alkaline membrane fuel cells. *Journal of Materials Chemistry A* **10**, 6587-6595 (2022).
24. Kim S, *et al.* Highly selective porous separator with thin skin layer for alkaline water electrolysis. *Journal of Power Sources* **524**, (2022).
25. Aili D, *et al.* Porous poly(perfluorosulfonic acid) membranes for alkaline water electrolysis. *Journal of Membrane Science* **493**, 589-598 (2015).

26. Chen Y, *et al.* Underfocus Laser Induced Ni Nanoparticles Embedded Metallic MoN Microrods as Patterned Electrode for Efficient Overall Water Splitting. *Adv Sci (Weinh)* **9**, e2105869 (2022).
27. Meena A, *et al.* Crystalline-amorphous interface of mesoporous Ni<sub>2</sub>P @ FePO<sub>x</sub>Hy for oxygen evolution at high current density in alkaline-anion-exchange-membrane water-electrolyzer. *Applied Catalysis B: Environmental* **306**, (2022).
28. López-Fernández E, *et al.* Ionomer-Free Nickel-Iron bimetallic electrodes for efficient anion exchange membrane water electrolysis. *Chemical Engineering Journal* **433**, 133774 (2022).
29. Khataee A, Shirole A, Jannasch P, Krüger A, Cornell A. Anion exchange membrane water electrolysis using Aemion™ membranes and nickel electrodes. *Journal of Materials Chemistry A* **10**, 16061-16070 (2022).
30. Lee J, *et al.* Chemical transformation approach for high-performance ternary NiFeCo metal compound-based water splitting electrodes. *Applied Catalysis B: Environmental* **294**, (2021).
31. Wang X, Lammertink RGH. Dimensionally stable multication-crosslinked poly(arylene piperidinium) membranes for water electrolysis. *Journal of Materials Chemistry A* **10**, 8401-8412 (2022).
32. Chen N, Paek SY, Lee JY, Park JH, Lee SY, Lee YM. High-performance anion exchange membrane water electrolyzers with a current density of 7.68 A cm<sup>-2</sup> and a durability of 1000 hours. *Energy & Environmental Science* **14**, 6338-6348 (2021).
33. Li H, Kraglund MR, Reumert AK, Ren X, Aili D, Yang J. Poly(vinyl benzyl methylpyrrolidinium) hydroxide derived anion exchange membranes for water electrolysis. *Journal of Materials Chemistry A* **7**, 17914-17922 (2019).
34. Bhushan M, Mani M, Singh AK, Panda AB, Shahi VK. Self-standing polyaniline membrane containing quaternary ammonium groups loaded with hollow spherical NiCo<sub>2</sub>O<sub>4</sub> electrocatalyst for alkaline water electrolyser. *Journal of Materials Chemistry A* **8**, 17089-17097 (2020).
35. Stiber S, *et al.* A high-performance, durable and low-cost proton exchange membrane electrolyser with stainless steel components. *Energy & Environmental Science* **15**, 109-122 (2022).
36. Kang Z, Chen Y, Wang H, Alia SM, Pivovar BS, Bender G. Discovering and Demonstrating a Novel High-Performing 2D-Patterned Electrode for Proton-Exchange Membrane Water Electrolysis Devices. *ACS Appl Mater Interfaces* **14**, 2335-2342 (2022).

37. Chae JE, *et al.* High-performance multiblock PEMs containing a highly acidic fluorinated-hydrophilic domain for water electrolysis. *Journal of Membrane Science* **638**, (2021).
38. Peng X, *et al.* Insights into Interfacial and Bulk Transport Phenomena Affecting Proton Exchange Membrane Water Electrolyzer Performance at Ultra-Low Iridium Loadings. *Adv Sci (Weinh)* **8**, e2102950 (2021).
39. Choi KJ, Kim H, Kim S-K. Multicomponent nonprecious hydrogen evolution catalysts for high performance and durable proton exchange membrane water electrolyzer. *Journal of Power Sources* **506**, (2021).
40. Stiber S, *et al.* Porous Transport Layers for Proton Exchange Membrane Electrolysis Under Extreme Conditions of Current Density, Temperature, and Pressure. *Advanced Energy Materials* **11**, (2021).
41. Thangavel P, Kim G, Kim KS. Electrochemical integration of amorphous NiFe (oxy)hydroxides on surface-activated carbon fibers for high-efficiency oxygen evolution in alkaline anion exchange membrane water electrolysis. *Journal of Materials Chemistry A* **9**, 14043-14051 (2021).
42. Jang MJ, *et al.* Promotion Effect of Modified Ni/C by La–Ce Oxide for Durable Hydrogen Evolution Reaction. *ACS Sustainable Chemistry & Engineering* **9**, 12508-12513 (2021).
43. Xu Z, Wan L, Liao Y, Wang P, Liu K, Wang B. Anisotropic anion exchange membranes with extremely high water uptake for water electrolysis and fuel cells. *Journal of Materials Chemistry A* **9**, 23485-23496 (2021).
44. Xu D, *et al.* Earth-Abundant Oxygen Electrocatalysts for Alkaline Anion-Exchange-Membrane Water Electrolysis: Effects of Catalyst Conductivity and Comparison with Performance in Three-Electrode Cells. *ACS Catalysis* **9**, 7-15 (2018).
45. Thangavel P, *et al.* Graphene-nanoplatelets-supported NiFe-MOF: high-efficiency and ultra-stable oxygen electrodes for sustained alkaline anion exchange membrane water electrolysis. *Energy & Environmental Science* **13**, 3447-3458 (2020).
46. Yue K, *et al.* In situ ion-exchange preparation and topological transformation of trimetal–organic frameworks for efficient electrocatalytic water oxidation. *Energy & Environmental Science* **14**, 6546-6553 (2021).
47. Lindquist GA, *et al.* Performance and Durability of Pure-Water-Fed Anion Exchange Membrane Electrolyzers Using Baseline Materials and Operation. *ACS Appl Mater Interfaces*, (2021).
48. Cha MS, *et al.* Poly(carbazole)-based anion-conducting materials with high performance and durability for energy conversion devices. *Energy & Environmental Science* **13**, 3633-3645 (2020).

49. Xiao J, *et al.* Water-Fed Hydroxide Exchange Membrane Electrolyzer Enabled by a Fluoride-Incorporated Nickel–Iron Oxyhydroxide Oxygen Evolution Electrode. *ACS Catalysis* **11**, 264-270 (2020).
50. Wang H, Tong Y, Li K, Chen P. Heterostructure engineering of iridium species on nickel/molybdenum nitride for highly-efficient anion exchange membrane water electrolyzer. *J Colloid Interface Sci* **628**, 306-314 (2022).
51. Pavel CC, *et al.* Highly efficient platinum group metal free based membrane-electrode assembly for anion exchange membrane water electrolysis. *Angew Chem Int Ed Engl* **53**, 1378-1381 (2014).
52. Leng Y, Chen G, Mendoza AJ, Tighe TB, Hickner MA, Wang CY. Solid-state water electrolysis with an alkaline membrane. *J Am Chem Soc* **134**, 9054-9057 (2012).
53. Soni R, Miyanishi S, Kuroki H, Yamaguchi T. Pure Water Solid Alkaline Water Electrolyzer Using Fully Aromatic and High-Molecular-Weight Poly(fluorene-alt-tetrafluorophenylene)-trimethyl Ammonium Anion Exchange Membranes and Ionomers. *ACS Applied Energy Materials* **4**, 1053-1058 (2020).
54. Otero J, *et al.* Sulphonated polyether ether ketone diaphragms used in commercial scale alkaline water electrolysis. *Journal of Power Sources* **247**, 967-974 (2014).
55. Wan L, Xu Z, Wang B. Green preparation of highly alkali-resistant PTFE composite membranes for advanced alkaline water electrolysis. *Chemical Engineering Journal* **426**, 131340 (2021).
56. Lee JW, *et al.* Cellulose nanocrystals–blended zirconia/polysulfone composite separator for alkaline electrolyzer at low electrolyte contents. *Chemical Engineering Journal* **428**, 131149 (2022).
57. Schalenbach M, Tjarks G, Carmo M, Lueke W, Mueller M, Stolten D. Acidic or Alkaline? Towards a New Perspective on the Efficiency of Water Electrolysis. *Journal of The Electrochemical Society* **163**, F3197-F3208 (2016).
58. Wan L, Xu Z, Wang P, Liu P-F, Xu Q, Wang B. Dual regulation both intrinsic activity and mass transport for self-supported electrodes using in anion exchange membrane water electrolysis. *Chemical Engineering Journal* **431**, 133942 (2022).
59. Wang L, *et al.* High Performance Anion Exchange Membrane Electrolysis Using Plasma-Sprayed, Non-Precious-Metal Electrodes. *ACS Applied Energy Materials* **2**, 7903-7912 (2019).

60. Faid AY, Barnett AO, Seland F, Sunde S. Tuning Ni-MoO<sub>2</sub> Catalyst-Ionomer and Electrolyte Interaction for Water Electrolyzers with Anion Exchange Membranes. *ACS Appl Energy Mater* **4**, 3327-3340 (2021).
61. Li K, *et al.* Engineered Thin Diffusion Layers for Anion-Exchange Membrane Electrolyzer Cells with Outstanding Performance. *ACS Appl Mater Interfaces* **13**, 50957-50964 (2021).
62. Jeon SS, Lim J, Kang PW, Lee JW, Kang G, Lee H. Design Principles of NiFe-Layered Double Hydroxide Anode Catalysts for Anion Exchange Membrane Water Electrolyzers. *ACS Appl Mater Interfaces* **13**, 37179-37186 (2021).
63. Alia SM, Ha M-A, Ngo C, Anderson GC, Ghoshal S, Pylypenko S. Platinum–Nickel Nanowires with Improved Hydrogen Evolution Performance in Anion Exchange Membrane-Based Electrolysis. *ACS Catalysis* **10**, 9953-9966 (2020).
64. Koshikawa H, *et al.* Single Nanometer-Sized NiFe-Layered Double Hydroxides as Anode Catalyst in Anion Exchange Membrane Water Electrolysis Cell with Energy Conversion Efficiency of 74.7% at 1.0 A cm<sup>-2</sup>. *ACS Catalysis* **10**, 1886-1893 (2020).
65. Chen N, *et al.* Poly(Alkyl-Terphenyl Piperidinium) Ionomers and Membranes with an Outstanding Alkaline-Membrane Fuel-Cell Performance of 2.58 W cm<sup>-2</sup>. *Angew Chem Int Ed Engl* **60**, 7710-7718 (2021).
66. Ham K, Hong S, Kang S, Cho K, Lee J. Extensive Active-Site Formation in Trirutile CoSb<sub>2</sub>O<sub>6</sub> by Oxygen Vacancy for Oxygen Evolution Reaction in Anion Exchange Membrane Water Splitting. *ACS Energy Letters* **6**, 364-370 (2021).
67. Park YS, *et al.* Hierarchical Chestnut-Burr Like Structure of Copper Cobalt Oxide Electrocatalyst Directly Grown on Ni Foam for Anion Exchange Membrane Water Electrolysis. *ACS Sustainable Chemistry & Engineering* **8**, 2344-2349 (2020).
68. Chen P, Hu X. High - Efficiency Anion Exchange Membrane Water Electrolysis Employing Non - Noble Metal Catalysts. *Advanced Energy Materials* **10**, (2020).
69. Kim J-C, Kim J, Park JC, Ahn SH, Kim D-W. Ru<sub>2</sub>P nanofibers for high-performance anion exchange membrane water electrolyzer. *Chemical Engineering Journal* **420**, (2021).
70. Kang S, Ham K, Lee J. Moderate oxophilic CoFe in carbon nanofiber for the oxygen evolution reaction in anion exchange membrane water electrolysis. *Electrochimica Acta* **353**, (2020).
71. Park JE, *et al.* High-performance anion-exchange membrane water electrolysis. *Electrochimica Acta* **295**, 99-106 (2019).

72. Park YS, *et al.* Co<sub>3</sub>S<sub>4</sub> nanosheets on Ni foam via electrodeposition with sulfurization as highly active electrocatalysts for anion exchange membrane electrolyzer. *International Journal of Hydrogen Energy* **45**, 36-45 (2020).
73. Guo W, Kim J, Kim H, Ahn SH. Cu–Co–P electrodeposited on carbon paper as an efficient electrocatalyst for hydrogen evolution reaction in anion exchange membrane water electrolyzers. *International Journal of Hydrogen Energy* **46**, 19789-19801 (2021).
